# Supplementary material for: The role of fear, disgust, and relevant experience in the assessment of stimuli associated with blood-injury-injection phobia
Source: PubMed Central journal article supplement — Heliyon. 2022 Nov 26;8(12):e11839. doi: 10.1016/j.heliyon.2022.e11839 (PMC9718979; doi:10.1016/j.heliyon.2022.e11839), 2022-11-26
Supplement: mmc1.pdf [file mmc1.pdf]

# MF rating images

Hi!

Thank you for taking part in this survey!

Please fill in a few short questionnaires and then rate the images presented. When evaluating the images, we want to know how people rate the images presented in the

- Valencia (how pleasant or positive)
  - Arousal (how intense)
  - Threat (how threatening or dangerous)
  - Disgust (how disgusting)
- dimensions.

We would like to draw your attention to the fact that the images to be evaluated present disturbing content (injuries, blood, sharp objects). Please start filling in the questionnaire with this in mind.

It should take approximately 20-25 minutes to complete the questionnaire and assess the images. Participation in the survey is voluntary. By taking part, you agree that the data you provide will be anonymised and aggregated for research purposes. The identity of the respondent cannot be traced in any way.

There are no right or wrong answers to the questions!

Thank you for helping us to carry out our research by completing this form.

Research leaders:

Dr. András Zsidó (Assistant Professor, Institute of Psychology, PTE BTK), e-mail:

[zsido.andras@pte.hu](mailto:zsido.andras@pte.hu)

Katalin Orsolya Burghardt

Khalil Suhad

László Botond Kiss

Léna Zilahi

---

## \*Kötelező

1. By completing the questionnaire, I confirm that I am over 18 years of age and that I agree to participate in the study and to the use of my answers and the data I provide for research purposes. \*

*Soronként csak egy oválist jelöljön be.*

Yes

No *Ugrás a következő szakaszra: 51 (End of the questionnaire)*

2. I acknowledge that I will continue to see images of disturbing content. \*

*Soroként csak egy oválist jelöljön be.*

Yes

No *Ugrás a következő szakaszra: 51 (End of the questionnaire)*

### Demographic questions

Please answer a few questions and fill in a few short questionnaires before you rate the pictures!

3. Age \*

---

4. Gender \*

*Soroként csak egy oválist jelöljön be.*

Female

Male

Else or Prefer not to say

5. Your highest qualification: \*

*Soroként csak egy oválist jelöljön be.*

Primary (completed eight grades of general school or less)

Secondary (vocational school, technical school, upper secondary school)

Tertiary level (higher vocational education, college, university)

## 6. Place of residence \*

*Soronként csak egy oválist jelöljön be.*

- Village
- Town
- City
- Metropolis, county seat
- Capital

## 7. Have you ever had to give first aid to someone? \*

*Soronként csak egy oválist jelöljön be.*

- Yes
- No

## 8. Have you studied first aid? \*

*Soronként csak egy oválist jelöljön be.*

- Yes
- No

## 9. If yes, when?

*Soronként csak egy oválist jelöljön be.*

- In one year
- 1-5 years
- more than 5 years ago

10. Have you worked in the last 12 months in a place where medical/healthcare knowledge was required? \*

*Soronként csak egy oválist jelöljön be.*

Yes

No

11. Do you have any medical/healthcare qualifications? \*

*Soronként csak egy oválist jelöljön be.*

Yes

No

12. How often do you go to various health examinations and screenings? \*

*Soronként csak egy oválist jelöljön be.*

Never

Every few years

Once a year

every half a year

Monthly

Weekly

13. How often do you see more serious injuries on TV, in movies, or in pictures? \*

*Soronként csak egy oválist jelöljön be.*

Never

Once a year

every half a year

Monthly

Weekly

Daily

14. How often do you see more serious injuries in person? \*

*Soronként csak egy oválist jelöljön be.*

- Never
- Once a year
- every half a year
- Monthly
- Weekly
- Daily

15. How often do you see blood on TV, in movies, or in pictures? \*

*Soronként csak egy oválist jelöljön be.*

- Never
- Once a year
- every half a year
- Monthly
- Weekly
- Daily

16. How often do you see blood in person? \*

*Soronként csak egy oválist jelöljön be.*

- Never
- Once a year
- every half a year
- Monthly
- Weekly
- Daily

17. Have you ever had a blood test? \*

*Soronként csak egy oválist jelöljön be.*

Yes

No

18. If yes, how often?

*Soronként csak egy oválist jelöljön be.*

Never

Every few years

Once a year

Every half a year

Quarterly

Monthly

19. Do you donate blood or plasma?

*Soronként csak egy oválist jelöljön be.*

Yes

No

20. If yes, how often?

*Soronként csak egy oválist jelöljön be.*

Never

Every few years

Once a year

Every half a year

Quarterly

Monthly

21. Have you ever get an injection before? \*

*Soronként csak egy oválist jelöljön be.*

Yes

No

22. If yes, how often?

*Soronként csak egy oválist jelöljön be.*

Never

Every few years

Once a year

Every half a year

Quarterly

Monthly

23. Have you ever seen or felt something so repulsive, disgusting (e.g., smell) that you felt sick? \*

*Soronként csak egy oválist jelöljön be.*

Never

Once

Several times

24. Has it ever happened that you have seen or experienced something so scary that you have fainted? \*

*Soronként csak egy oválist jelöljön be.*

Never

Once

Several times

25. Has it ever happened that you have seen or experienced something so scary \*  
that you felt sick?

*Soronként csak egy oválist jelöljön be.*

- Never  
 Once  
 Several times

26. Have you ever seen or felt something so repulsive, disgusting (e.g., smell) \*  
that you fainted?

*Soronként csak egy oválist jelöljön be.*

- Never  
 Once  
 Several times

DS-R

Please indicate for each statement whether it is true or false to you.

27. 1: Seeing a cockroach in someone else's house doesn't bother me. \*

*Soronként csak egy oválist jelöljön be.*

- True  
 False

28. 2: It bothers me to hear someone clear a throat full of mucous. \*

*Soronként csak egy oválist jelöljön be.*

- True  
 False



29. 3: it would bother me to be in a science class, and to see a human hand preserved in a jar. \*

*Soronként csak egy oválist jelöljön be.*

- True  
 False

30. 4: I would go out of my way to avoid walking through a graveyard. \*

*Soronként csak egy oválist jelöljön be.*

- True  
 False

31. 5: I never let any part of my body touch the toilet seat in public restrooms. \*

*Soronként csak egy oválist jelöljön be.*

- True  
 False

32. 6: Even if I was hungry, I would not drink a bowl of my favorite soup if it had been stirred by a used but thoroughly washed flyswatter. \*

*Soronként csak egy oválist jelöljön be.*

- True  
 False

33. 7: I might be willing to try eating monkey meat, under some circumstances. \*

*Soronként csak egy oválist jelöljön be.*

- True  
 False

34. 8: It would bother me to see a rat run across my path in a park. \*

*Soronként csak egy oválist jelöljön be.*

- True  
 False

35. 9: If I see someone vomit, it makes me sick to my stomach. \*

*Soronként csak egy oválist jelöljön be.*

- True  
 False

36. 10: It would not upset me at all to watch a person with a glass eye take the eye out of the socket. \*

*Soronként csak egy oválist jelöljön be.*

- True  
 False

37. 11: It would bother me tremendously to touch a dead body. \*

*Soronként csak egy oválist jelöljön be.*

- True  
 False

38. 12: I probably would not go to my favorite restaurant if I found out that the cook had a cold. \*

*Soronként csak egy oválist jelöljön be.*

- True  
 False

39. 13: It would bother me to sleep in a nice hotel room if I knew that a man had died of a heart attack in that room the night before. \*

*Soronként csak egy oválist jelöljön be.*

- True  
 False

**Please rate how disgusting you would find the following experiences.**

40. 14: You see someone put ketchup on vanilla ice cream, and eat it. \*

*Soronként csak egy oválist jelöljön be.*

- Not disgusting at all  
 Slightly disgusting  
 Very disgusting

41. 15: You see maggots on a piece of meat in an outdoor garbage pail. \*

*Soronként csak egy oválist jelöljön be.*

- Not disgusting at all  
 Slightly disgusting  
 Very disgusting

42. 16: While you are walking through a tunnel under a railroad track, you smell urine. \*

*Soronként csak egy oválist jelöljön be.*

- Not disgusting at all  
 Slightly disgusting  
 Very disgusting

43. 17: Your friend's pet cat dies, and you have to pick up the dead body with your bare hands. \*

*Soronként csak egy oválist jelöljön be.*

- Not disgusting at all
- Slightly disgusting
- Very disgusting

44. 18: You take a sip of soda, and then realize that you drank from the glass that an acquaintance of yours had been drinking from. \*

*Soronként csak egy oválist jelöljön be.*

- Not disgusting at all
- Slightly disgusting
- Very disgusting

45. 19: A friend offers you a piece of chocolate shaped like dog-doo. \*

*Soronként csak egy oválist jelöljön be.*

- Not disgusting at all
- Slightly disgusting
- Very disgusting

46. 20: You are about to drink a glass of milk when you smell that it is spoiled \*

*Soronként csak egy oválist jelöljön be.*

- Not disgusting at all
- Slightly disgusting
- Very disgusting

47. 21: You are walking barefoot on concrete, and you step on an earthworm. \*

*Soronként csak egy oválist jelöljön be.*

- Not disgusting at all  
 Slightly disgusting  
 Very disgusting

48. 22: You see a man with his intestines exposed after an accident. \*

*Soronként csak egy oválist jelöljön be.*

- Not disgusting at all  
 Slightly disgusting  
 Very disgusting

49. 23: You accidentally touch the ashes of a person who has been cremated. \*

*Soronként csak egy oválist jelöljön be.*

- Not disgusting at all  
 Slightly disgusting  
 Very disgusting

50. 24: You discover that a friend of yours changes underwear only once a week. \*

*Soronként csak egy oválist jelöljön be.*

- Not disgusting at all  
 Slightly disgusting  
 Very disgusting

51. 25: As part of a sex education class, you are required to inflate a new unlubricated condom, using your mouth. \*

*Soronként csak egy oválist jelöljön be.*

- Not disgusting at all
- Slightly disgusting
- Very disgusting

MFS

The following situations are known to cause some people to experience fear and apprehension. Please rate for each situation listed, how much fear or tension you would experience if you were exposed to that situation at this time. Use the following scale to evaluate each situation and place a mark (X) in the space corresponding to how much fear or tension you would experience in the listed situation.

0 = No fear or concern at all, 1 = Mild fear, 2 = Considerable fear, 3 = Intense fear

### How Much Fear or Discomfort Would You Experience From:

52. Cutting with a hunting knife \*

*Soronként csak egy oválist jelöljön be.*

|                           | 0                     | 1                     | 2                     | 3                     |              |
|---------------------------|-----------------------|-----------------------|-----------------------|-----------------------|--------------|
| No fear or concern at all | <input type="radio"/> | <input type="radio"/> | <input type="radio"/> | <input type="radio"/> | Intense fear |

53. Seeing a small vial of your own blood \*

*Soronként csak egy oválist jelöljön be.*

|                           | 0                     | 1                     | 2                     | 3                     |              |
|---------------------------|-----------------------|-----------------------|-----------------------|-----------------------|--------------|
| No fear or concern at all | <input type="radio"/> | <input type="radio"/> | <input type="radio"/> | <input type="radio"/> | Intense fear |

## 54. Observing someone chop with an axe \*

Soronként csak egy oválist jelöljön be.

|                           |                       |                       |                       |                       |              |
|---------------------------|-----------------------|-----------------------|-----------------------|-----------------------|--------------|
|                           | 0                     | 1                     | 2                     | 3                     |              |
| No fear or concern at all | <input type="radio"/> | <input type="radio"/> | <input type="radio"/> | <input type="radio"/> | Intense fear |

## 55. Feeling you will faint \*

Soronként csak egy oválist jelöljön be.

|                           |                       |                       |                       |                       |              |
|---------------------------|-----------------------|-----------------------|-----------------------|-----------------------|--------------|
|                           | 0                     | 1                     | 2                     | 3                     |              |
| No fear or concern at all | <input type="radio"/> | <input type="radio"/> | <input type="radio"/> | <input type="radio"/> | Intense fear |

## 56. Seeing a small test tube of animal blood \*

Soronként csak egy oválist jelöljön be.

|                           |                       |                       |                       |                       |              |
|---------------------------|-----------------------|-----------------------|-----------------------|-----------------------|--------------|
|                           | 0                     | 1                     | 2                     | 3                     |              |
| No fear or concern at all | <input type="radio"/> | <input type="radio"/> | <input type="radio"/> | <input type="radio"/> | Intense fear |

## 57. Feeling pains in your chest \*

Soronként csak egy oválist jelöljön be.

|                           |                       |                       |                       |                       |              |
|---------------------------|-----------------------|-----------------------|-----------------------|-----------------------|--------------|
|                           | 0                     | 1                     | 2                     | 3                     |              |
| No fear or concern at all | <input type="radio"/> | <input type="radio"/> | <input type="radio"/> | <input type="radio"/> | Intense fear |

## 58. Observing a surgical amputation \*

Soronként csak egy oválist jelöljön be.

|                           |                       |                       |                       |                       |              |
|---------------------------|-----------------------|-----------------------|-----------------------|-----------------------|--------------|
|                           | 0                     | 1                     | 2                     | 3                     |              |
| No fear or concern at all | <input type="radio"/> | <input type="radio"/> | <input type="radio"/> | <input type="radio"/> | Intense fear |

59. Receiving a hypodermic injection in the arm \*

*Soronként csak egy oválist jelöljön be.*

|                           | 0                     | 1                     | 2                     | 3                     |              |
|---------------------------|-----------------------|-----------------------|-----------------------|-----------------------|--------------|
| No fear or concern at all | <input type="radio"/> | <input type="radio"/> | <input type="radio"/> | <input type="radio"/> | Intense fear |

60. Having a severe headache \*

*Soronként csak egy oválist jelöljön be.*

|                           | 0                     | 1                     | 2                     | 3                     |              |
|---------------------------|-----------------------|-----------------------|-----------------------|-----------------------|--------------|
| No fear or concern at all | <input type="radio"/> | <input type="radio"/> | <input type="radio"/> | <input type="radio"/> | Intense fear |

61. Seeing mutilated body on TV \*

*Soronként csak egy oválist jelöljön be.*

|                           | 0                     | 1                     | 2                     | 3                     |              |
|---------------------------|-----------------------|-----------------------|-----------------------|-----------------------|--------------|
| No fear or concern at all | <input type="radio"/> | <input type="radio"/> | <input type="radio"/> | <input type="radio"/> | Intense fear |

62. Seeing a small bottle of human blood on TV \*

*Soronként csak egy oválist jelöljön be.*

|                           | 0                     | 1                     | 2                     | 3                     |              |
|---------------------------|-----------------------|-----------------------|-----------------------|-----------------------|--------------|
| No fear or concern at all | <input type="radio"/> | <input type="radio"/> | <input type="radio"/> | <input type="radio"/> | Intense fear |

63. Having blood drawn from your arm \*

*Soronként csak egy oválist jelöljön be.*

|                           | 0                     | 1                     | 2                     | 3                     |              |
|---------------------------|-----------------------|-----------------------|-----------------------|-----------------------|--------------|
| No fear or concern at all | <input type="radio"/> | <input type="radio"/> | <input type="radio"/> | <input type="radio"/> | Intense fear |



## 64. Observing someone operate a power saw \*

Soronként csak egy oválist jelöljön be.

|                           | 0                     | 1                     | 2                     | 3                     |              |
|---------------------------|-----------------------|-----------------------|-----------------------|-----------------------|--------------|
| No fear or concern at all | <input type="radio"/> | <input type="radio"/> | <input type="radio"/> | <input type="radio"/> | Intense fear |

## 65. Seeing a large bottle of your own blood \*

Soronként csak egy oválist jelöljön be.

|                           | 0                     | 1                     | 2                     | 3                     |              |
|---------------------------|-----------------------|-----------------------|-----------------------|-----------------------|--------------|
| No fear or concern at all | <input type="radio"/> | <input type="radio"/> | <input type="radio"/> | <input type="radio"/> | Intense fear |

## 66. Handling a butcher knife \*

Soronként csak egy oválist jelöljön be.

|                           | 0                     | 1                     | 2                     | 3                     |              |
|---------------------------|-----------------------|-----------------------|-----------------------|-----------------------|--------------|
| No fear or concern at all | <input type="radio"/> | <input type="radio"/> | <input type="radio"/> | <input type="radio"/> | Intense fear |

## 67. Having a blood sample drawn from your finger tip \*

Soronként csak egy oválist jelöljön be.

|                           | 0                     | 1                     | 2                     | 3                     |              |
|---------------------------|-----------------------|-----------------------|-----------------------|-----------------------|--------------|
| No fear or concern at all | <input type="radio"/> | <input type="radio"/> | <input type="radio"/> | <input type="radio"/> | Intense fear |

## 68. Handling an open pocket knife \*

Soronként csak egy oválist jelöljön be.

|                           | 0                     | 1                     | 2                     | 3                     |              |
|---------------------------|-----------------------|-----------------------|-----------------------|-----------------------|--------------|
| No fear or concern at all | <input type="radio"/> | <input type="radio"/> | <input type="radio"/> | <input type="radio"/> | Intense fear |

69. Seeing someone receiving an injection in the arm \*

*Soronként csak egy oválist jelöljön be.*

|                           |                       |                       |                       |                       |              |
|---------------------------|-----------------------|-----------------------|-----------------------|-----------------------|--------------|
| 0                         | 1                     | 2                     | 3                     |                       |              |
| No fear or concern at all | <input type="radio"/> | <input type="radio"/> | <input type="radio"/> | <input type="radio"/> | Intense fear |

70. Seeing a bleeding wound to a person's eye \*

*Soronként csak egy oválist jelöljön be.*

|                           |                       |                       |                       |                       |              |
|---------------------------|-----------------------|-----------------------|-----------------------|-----------------------|--------------|
| 0                         | 1                     | 2                     | 3                     |                       |              |
| No fear or concern at all | <input type="radio"/> | <input type="radio"/> | <input type="radio"/> | <input type="radio"/> | Intense fear |

71. Feeling your heart race for no obvious reason \*

*Soronként csak egy oválist jelöljön be.*

|                           |                       |                       |                       |                       |              |
|---------------------------|-----------------------|-----------------------|-----------------------|-----------------------|--------------|
| 0                         | 1                     | 2                     | 3                     |                       |              |
| No fear or concern at all | <input type="radio"/> | <input type="radio"/> | <input type="radio"/> | <input type="radio"/> | Intense fear |

72. Seeing the mutilated body of a dog that had been run over by a car \*

*Soronként csak egy oválist jelöljön be.*

|                           |                       |                       |                       |                       |              |
|---------------------------|-----------------------|-----------------------|-----------------------|-----------------------|--------------|
| 0                         | 1                     | 2                     | 3                     |                       |              |
| No fear or concern at all | <input type="radio"/> | <input type="radio"/> | <input type="radio"/> | <input type="radio"/> | Intense fear |

73. Feeling odd tingling in your arm \*

*Soronként csak egy oválist jelöljön be.*

|                           |                       |                       |                       |                       |              |
|---------------------------|-----------------------|-----------------------|-----------------------|-----------------------|--------------|
| 0                         | 1                     | 2                     | 3                     |                       |              |
| No fear or concern at all | <input type="radio"/> | <input type="radio"/> | <input type="radio"/> | <input type="radio"/> | Intense fear |

## 74. Seeing photos of wounded soldiers from war \*

*Soronként csak egy oválist jelöljön be.*

|                           |                       |                       |                       |                       |              |
|---------------------------|-----------------------|-----------------------|-----------------------|-----------------------|--------------|
| 0                         | 1                     | 2                     | 3                     |                       |              |
| No fear or concern at all | <input type="radio"/> | <input type="radio"/> | <input type="radio"/> | <input type="radio"/> | Intense fear |

## 75. Feeling nauseated \*

*Soronként csak egy oválist jelöljön be.*

|                           |                       |                       |                       |                       |              |
|---------------------------|-----------------------|-----------------------|-----------------------|-----------------------|--------------|
| 0                         | 1                     | 2                     | 3                     |                       |              |
| No fear or concern at all | <input type="radio"/> | <input type="radio"/> | <input type="radio"/> | <input type="radio"/> | Intense fear |

## 76. Seeing a small vial of human blood \*

*Soronként csak egy oválist jelöljön be.*

|                           |                       |                       |                       |                       |              |
|---------------------------|-----------------------|-----------------------|-----------------------|-----------------------|--------------|
| 0                         | 1                     | 2                     | 3                     |                       |              |
| No fear or concern at all | <input type="radio"/> | <input type="radio"/> | <input type="radio"/> | <input type="radio"/> | Intense fear |

STAI-  
5

Below are some of the statements people use to describe themselves. Please read some of them carefully and tick the appropriate one, depending on HOW YOU FEEL ABOUT YOURSELF.

- 1 = Not at all typical
- 2 = Somewhat typical
- 3 = Fairly typical
- 4 = Absolutely typical

## 77. I feel that I have so many unresolved problems that I can't control them. \*

*Soronként csak egy oválist jelöljön be.*

|                    |                       |                       |                       |                       |                    |
|--------------------|-----------------------|-----------------------|-----------------------|-----------------------|--------------------|
| 1                  | 2                     | 3                     | 4                     |                       |                    |
| Not at all typical | <input type="radio"/> | <input type="radio"/> | <input type="radio"/> | <input type="radio"/> | Absolutely typical |

78. I often take the small things to heart. \*

*Soronként csak egy oválist jelöljön be.*

1 2 3 4

Not at all typical     Absolutely typical

79. Even trivial things take up a lot of my time and keep me busy. \*

*Soronként csak egy oválist jelöljön be.*

1 2 3 4

Not at all typical     Absolutely typical

80. Disappointments get to me so much that I can't get them out of my head. \*

*Soronként csak egy oválist jelöljön be.*

1 2 3 4

Not at all typical     Absolutely typical

81. I get in a tense state of mind and get excited when I think about the troubles and troubles of the last period. \*

*Soronként csak egy oválist jelöljön be.*

1 2 3 4

Not at all typical     Absolutely typical

Rate the  
picture  
below!

Please rate the images presented in the questionnaire on a nine-point scale along the following dimensions:

- valence (how pleasant or unpleasant the picture is)
- arousal (how intensely emotional the image evokes)
- threat (how threatening you find the image)
- disgust (how disgusting you find the image)

where:

Valence:

1=disgust/negative

5=neutral

9=pleasant/positive

Arousal:

1=calm/peaceful

5=neutral

9=excited/excited

Threat:

1=unthreatening

9=threatening

Disgust

1 = not disgusting

9 = disgusting

## 82. Picture 1 \*

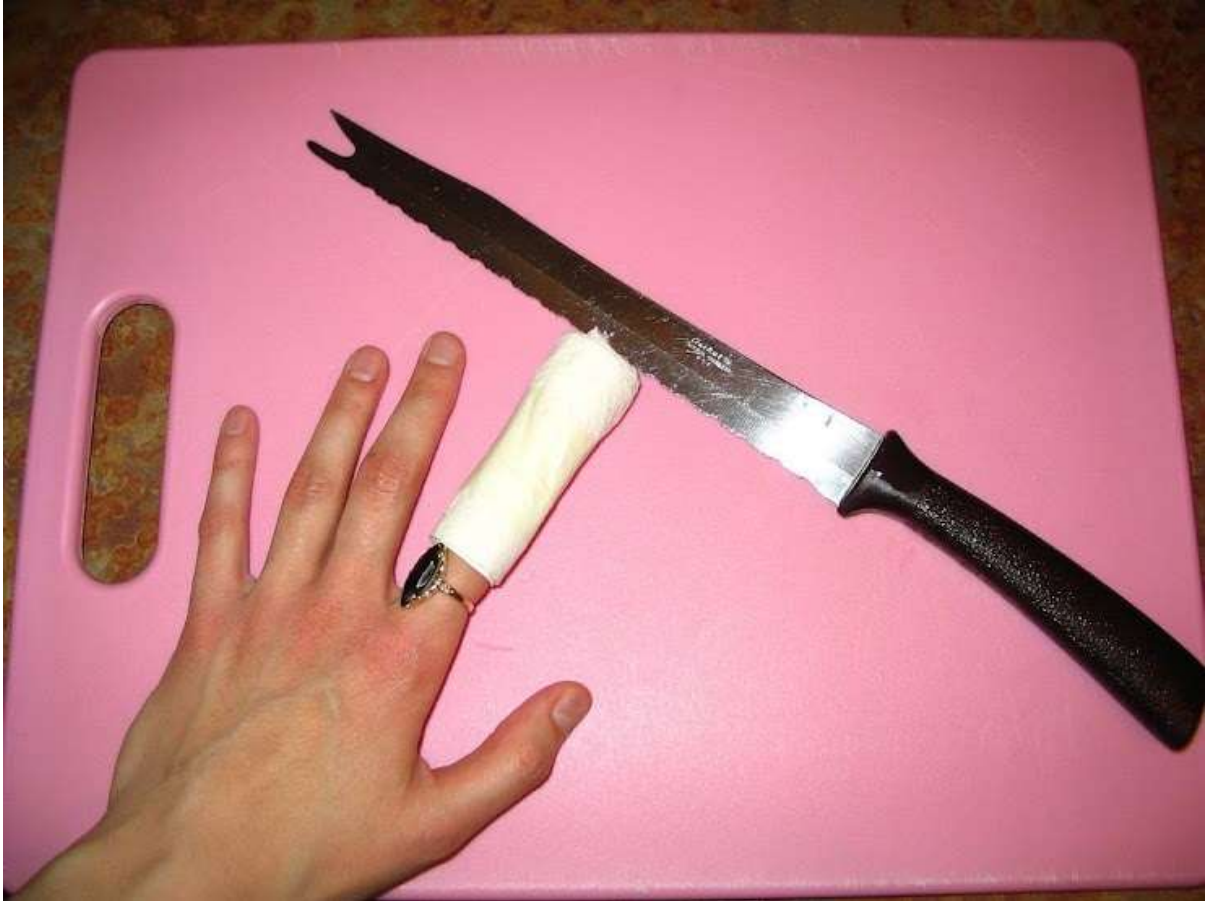

Soronként csak egy oválist jelöljön be.

|                                                          | 1                     | 2                     | 3                     | 4                     | 5                     | 6                     | 7                     | 8                     |
|----------------------------------------------------------|-----------------------|-----------------------|-----------------------|-----------------------|-----------------------|-----------------------|-----------------------|-----------------------|
| - valence<br>(how pleasant or unpleasant the picture is) | <input type="radio"/> |
| - arousal<br>(how intensely emotional the image evokes)  | <input type="radio"/> |
| - threat<br>(how threatening you find the image)         | <input type="radio"/> |
| - disgust<br>(how disgusting)                            | <input type="radio"/> |

**you find  
the image)**

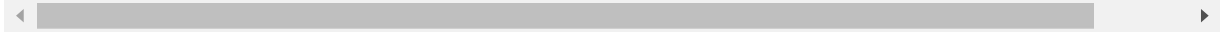

**Rate the  
picture  
below!**

Please rate the images presented in the questionnaire on a nine-point scale along the following dimensions:

- valence (how pleasant or unpleasant the picture is)
- arousal (how intensely emotional the image evokes)
- threat (how threatening you find the image)
- disgust (how disgusting you find the image)

where:

Valence:

1=disgust/negative

5=neutral

9=pleasant/positive

Arousal:

1=calm/peaceful

5=neutral

9=excited/excited

Threat:

1=unthreatening

9=threatening

Disgust

1 = not disgusting

9 = disgusting

## 83. Picture 2 \*

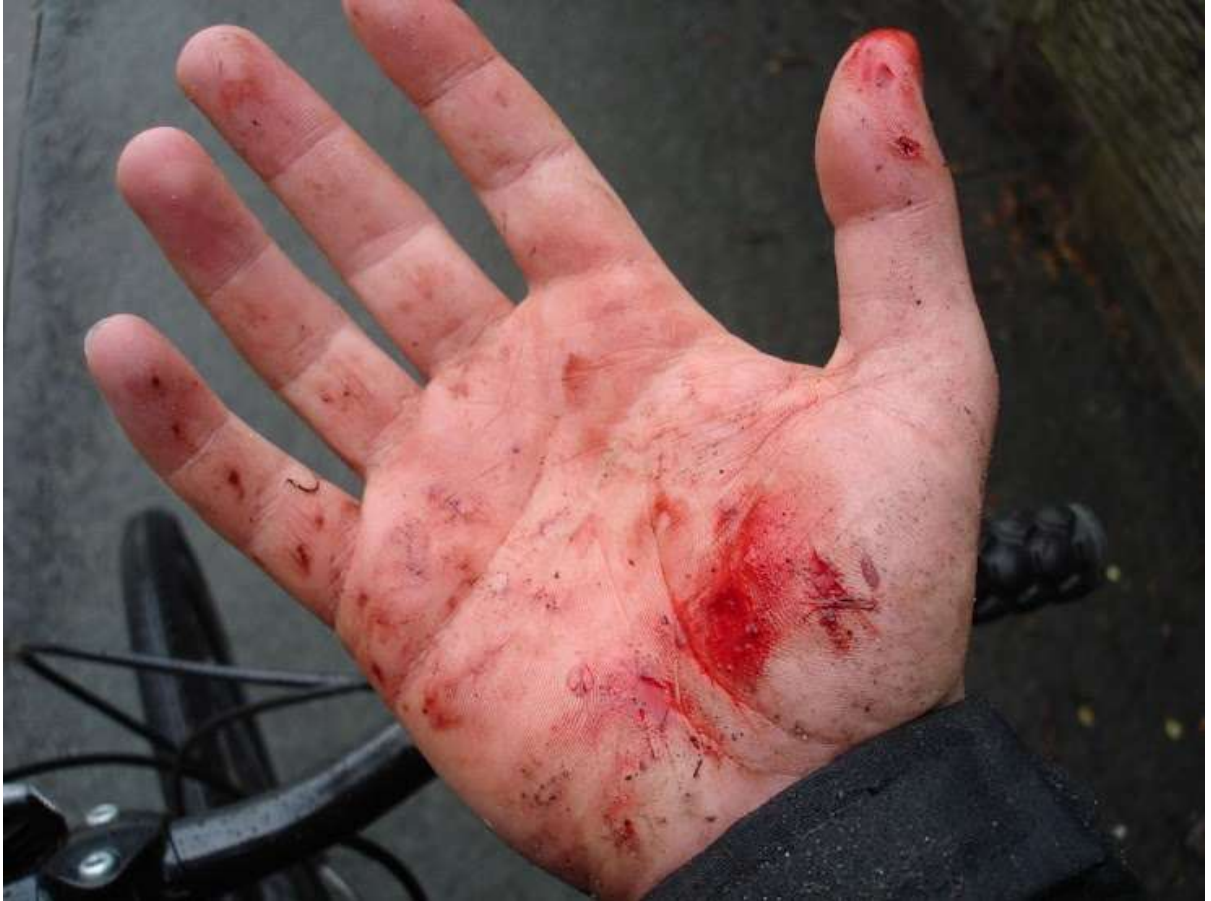

Soronként csak egy oválist jelöljön be.

|                                                          | 1                     | 2                     | 3                     | 4                     | 5                     | 6                     | 7                     | 8                     |
|----------------------------------------------------------|-----------------------|-----------------------|-----------------------|-----------------------|-----------------------|-----------------------|-----------------------|-----------------------|
| - valence<br>(how pleasant or unpleasant the picture is) | <input type="radio"/> |
| - arousal<br>(how intensely emotional the image evokes)  | <input type="radio"/> |
| - threat<br>(how threatening you find the image)         | <input type="radio"/> |
| - disgust<br>(how disgusting)                            | <input type="radio"/> |



**you find  
the image)**



**Rate the  
picture  
below!**

Please rate the images presented in the questionnaire on a nine-point scale along the following dimensions:

- valence (how pleasant or unpleasant the picture is)
- arousal (how intensely emotional the image evokes)
- threat (how threatening you find the image)
- disgust (how disgusting you find the image)

where:

Valence:

1=disgust/negative

5=neutral

9=pleasant/positive

Arousal:

1=calm/peaceful

5=neutral

9=excited/excited

Threat:

1=unthreatening

9=threatening

Disgust

1 = not disgusting

9 = disgusting

## 84. Picture 3 \*

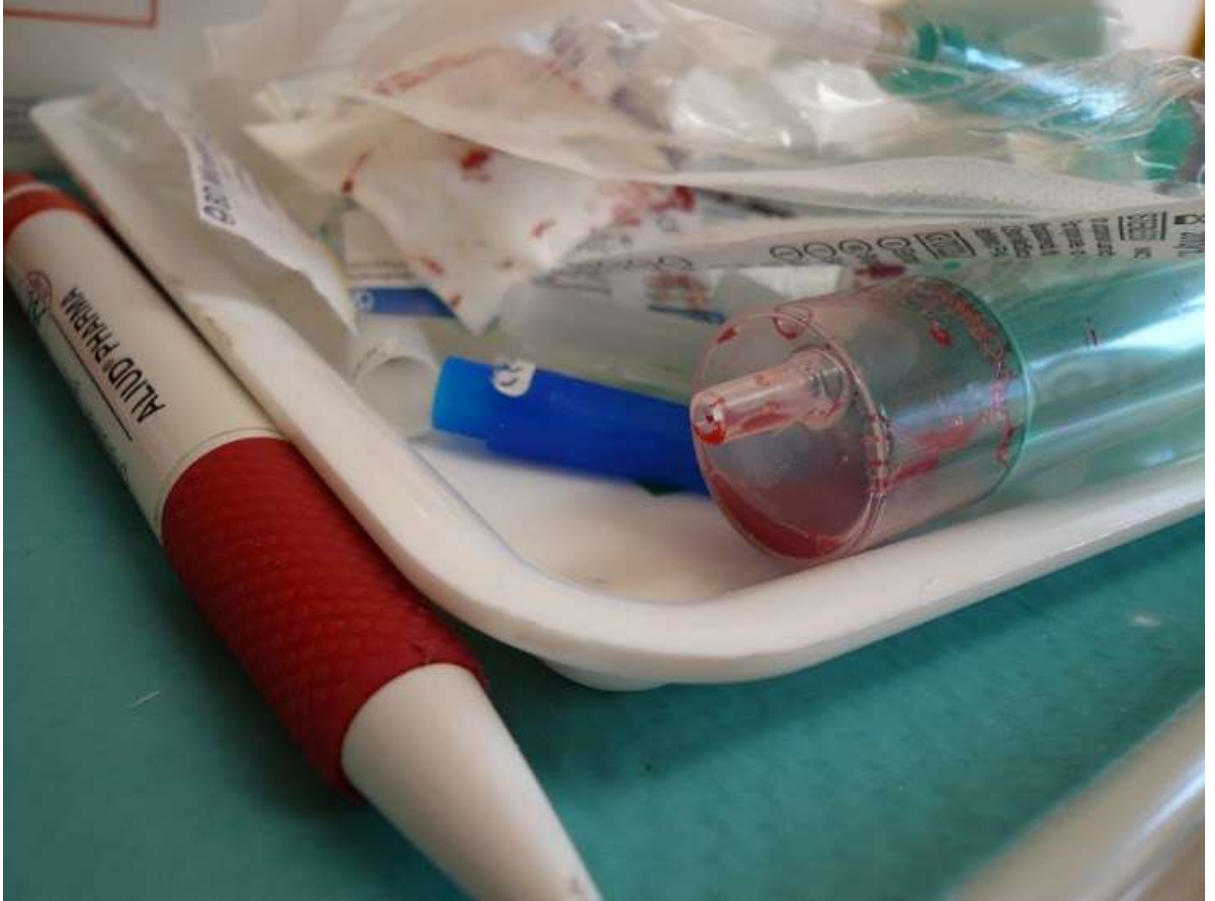

Soronként csak egy oválist jelöljön be.

|                                                          | 1                     | 2                     | 3                     | 4                     | 5                     | 6                     | 7                     | 8                     |
|----------------------------------------------------------|-----------------------|-----------------------|-----------------------|-----------------------|-----------------------|-----------------------|-----------------------|-----------------------|
| - valence<br>(how pleasant or unpleasant the picture is) | <input type="radio"/> |
| - arousal<br>(how intensely emotional the image evokes)  | <input type="radio"/> |
| - threat<br>(how threatening you find the image)         | <input type="radio"/> |
| - disgust<br>(how disgusting)                            | <input type="radio"/> |

**you find  
the image)**



**Rate the  
picture  
below!**

Please rate the images presented in the questionnaire on a nine-point scale along the following dimensions:

- valence (how pleasant or unpleasant the picture is)
- arousal (how intensely emotional the image evokes)
- threat (how threatening you find the image)
- disgust (how disgusting you find the image)

where:

Valence:

1=disgust/negative

5=neutral

9=pleasant/positive

Arousal:

1=calm/peaceful

5=neutral

9=excited/excited

Threat:

1=unthreatening

9=threatening

Disgust

1 = not disgusting

9 = disgusting

## 85. Picture 4 \*

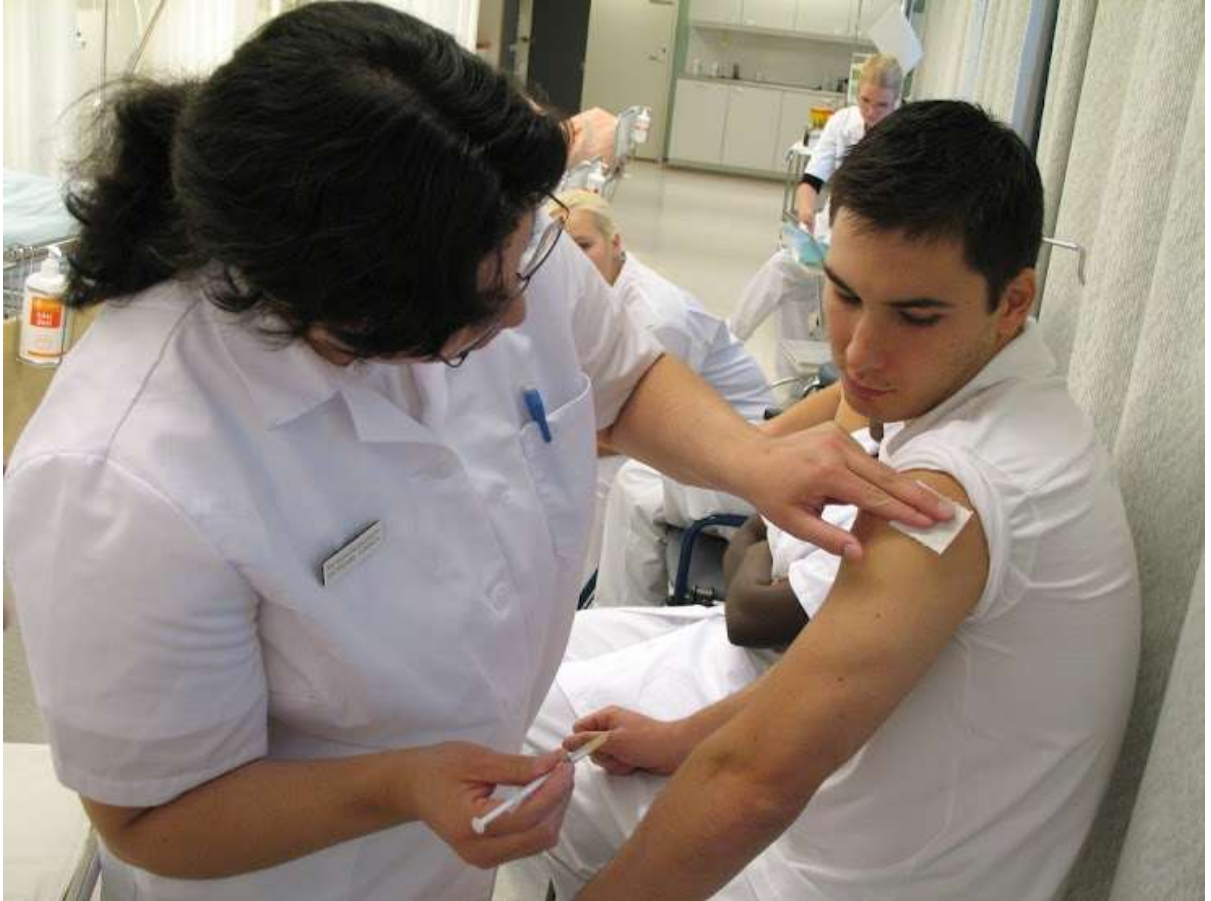

Soronként csak egy oválist jelöljön be.

|                                                          | 1                     | 2                     | 3                     | 4                     | 5                     | 6                     | 7                     | 8                     |
|----------------------------------------------------------|-----------------------|-----------------------|-----------------------|-----------------------|-----------------------|-----------------------|-----------------------|-----------------------|
| - valence<br>(how pleasant or unpleasant the picture is) | <input type="radio"/> |
| - arousal<br>(how intensely emotional the image evokes)  | <input type="radio"/> |
| - threat<br>(how threatening you find the image)         | <input type="radio"/> |
| - disgust<br>(how disgusting)                            | <input type="radio"/> |

**you find  
the image)**

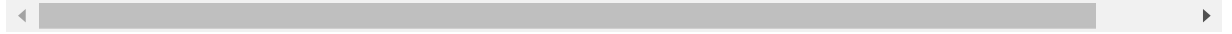

**Rate the  
picture  
below!**

Please rate the images presented in the questionnaire on a nine-point scale along the following dimensions:

- valence (how pleasant or unpleasant the picture is)
- arousal (how intensely emotional the image evokes)
- threat (how threatening you find the image)
- disgust (how disgusting you find the image)

where:

Valence:

1=disgust/negative

5=neutral

9=pleasant/positive

Arousal:

1=calm/peaceful

5=neutral

9=excited/excited

Threat:

1=unthreatening

9=threatening

Disgust

1 = not disgusting

9 = disgusting

## 86. Picture 5 \*

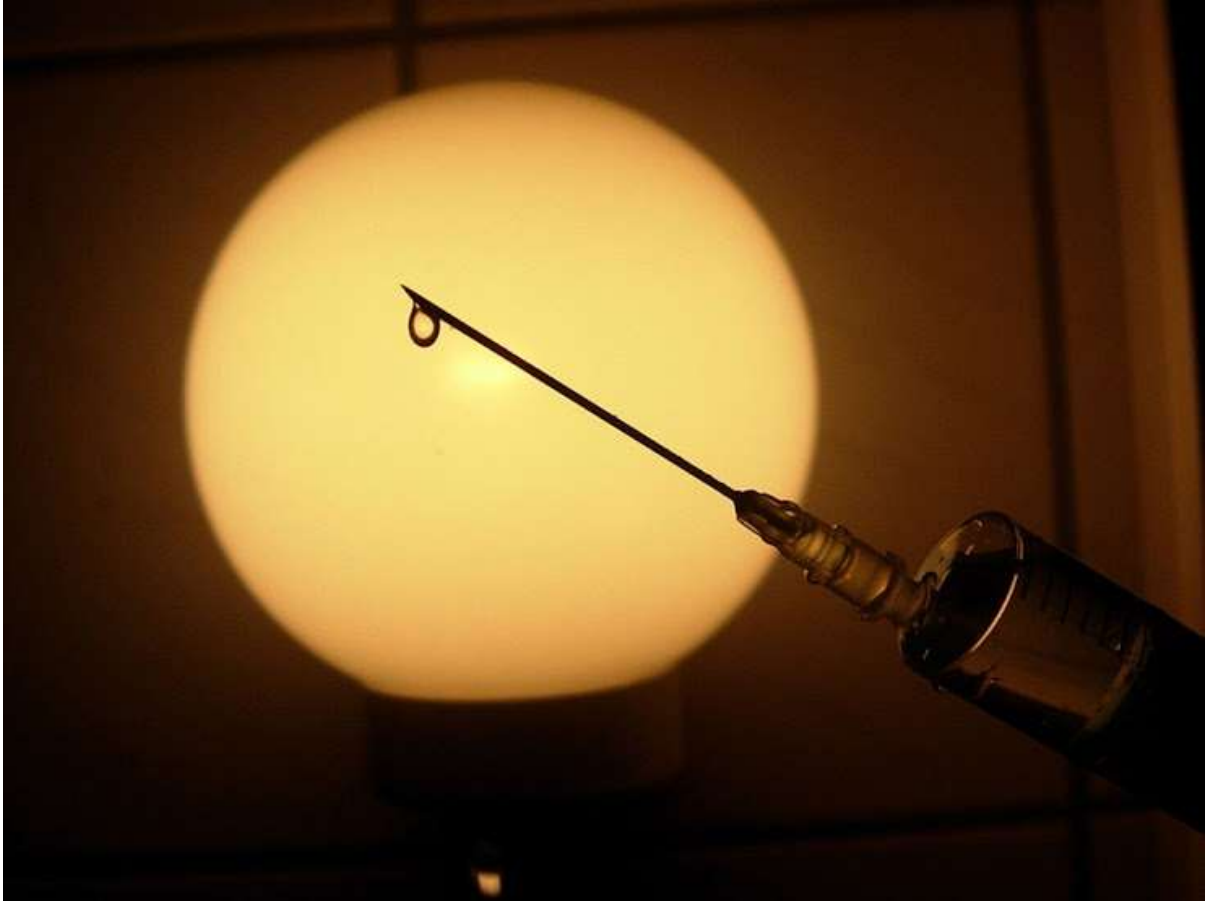

Soronként csak egy oválist jelöljön be.

|                                                          | 1                     | 2                     | 3                     | 4                     | 5                     | 6                     | 7                     | 8                     |
|----------------------------------------------------------|-----------------------|-----------------------|-----------------------|-----------------------|-----------------------|-----------------------|-----------------------|-----------------------|
| - valence<br>(how pleasant or unpleasant the picture is) | <input type="radio"/> |
| - arousal<br>(how intensely emotional the image evokes)  | <input type="radio"/> |
| - threat<br>(how threatening you find the image)         | <input type="radio"/> |
| - disgust<br>(how disgusting)                            | <input type="radio"/> |

**you find  
the image)**



**Rate the  
picture  
below!**

Please rate the images presented in the questionnaire on a nine-point scale along the following dimensions:

- valence (how pleasant or unpleasant the picture is)
- arousal (how intensely emotional the image evokes)
- threat (how threatening you find the image)
- disgust (how disgusting you find the image)

where:

Valence:

1=disgust/negative

5=neutral

9=pleasant/positive

Arousal:

1=calm/peaceful

5=neutral

9=excited/excited

Threat:

1=unthreatening

9=threatening

Disgust

1 = not disgusting

9 = disgusting

## 87. Picture 6 \*

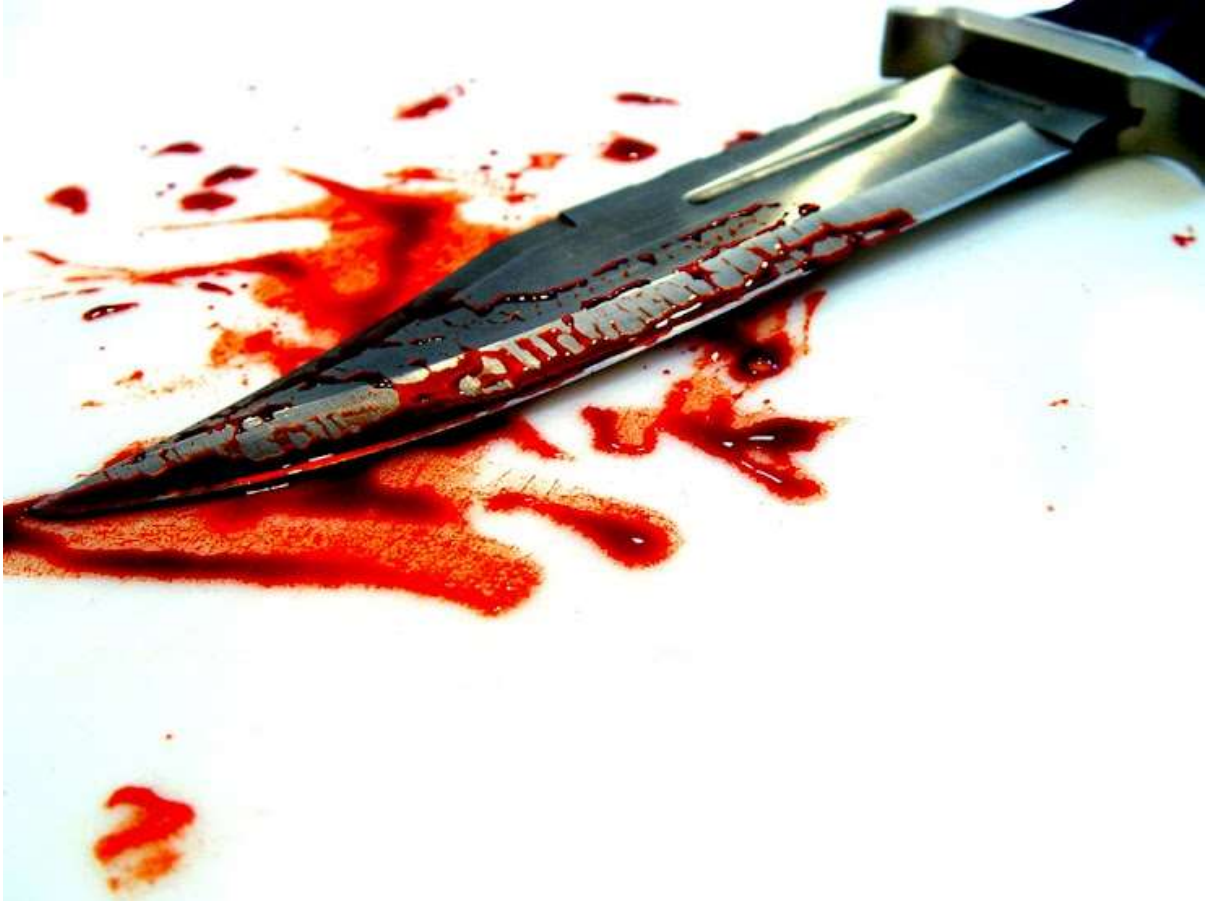

Soronként csak egy oválist jelöljön be.

|                                                          | 1                     | 2                     | 3                     | 4                     | 5                     | 6                     | 7                     | 8                     |
|----------------------------------------------------------|-----------------------|-----------------------|-----------------------|-----------------------|-----------------------|-----------------------|-----------------------|-----------------------|
| - valence<br>(how pleasant or unpleasant the picture is) | <input type="radio"/> |
| - arousal<br>(how intensely emotional the image evokes)  | <input type="radio"/> |
| - threat<br>(how threatening you find the image)         | <input type="radio"/> |
| - disgust<br>(how disgusting)                            | <input type="radio"/> |



**you find  
the image)**



**Rate the  
picture  
below!**

Please rate the images presented in the questionnaire on a nine-point scale along the following dimensions:

- valence (how pleasant or unpleasant the picture is)
- arousal (how intensely emotional the image evokes)
- threat (how threatening you find the image)
- disgust (how disgusting you find the image)

where:

Valence:

1=disgust/negative

5=neutral

9=pleasant/positive

Arousal:

1=calm/peaceful

5=neutral

9=excited/excited

Threat:

1=unthreatening

9=threatening

Disgust

1 = not disgusting

9 = disgusting

## 88. Picture 7 \*

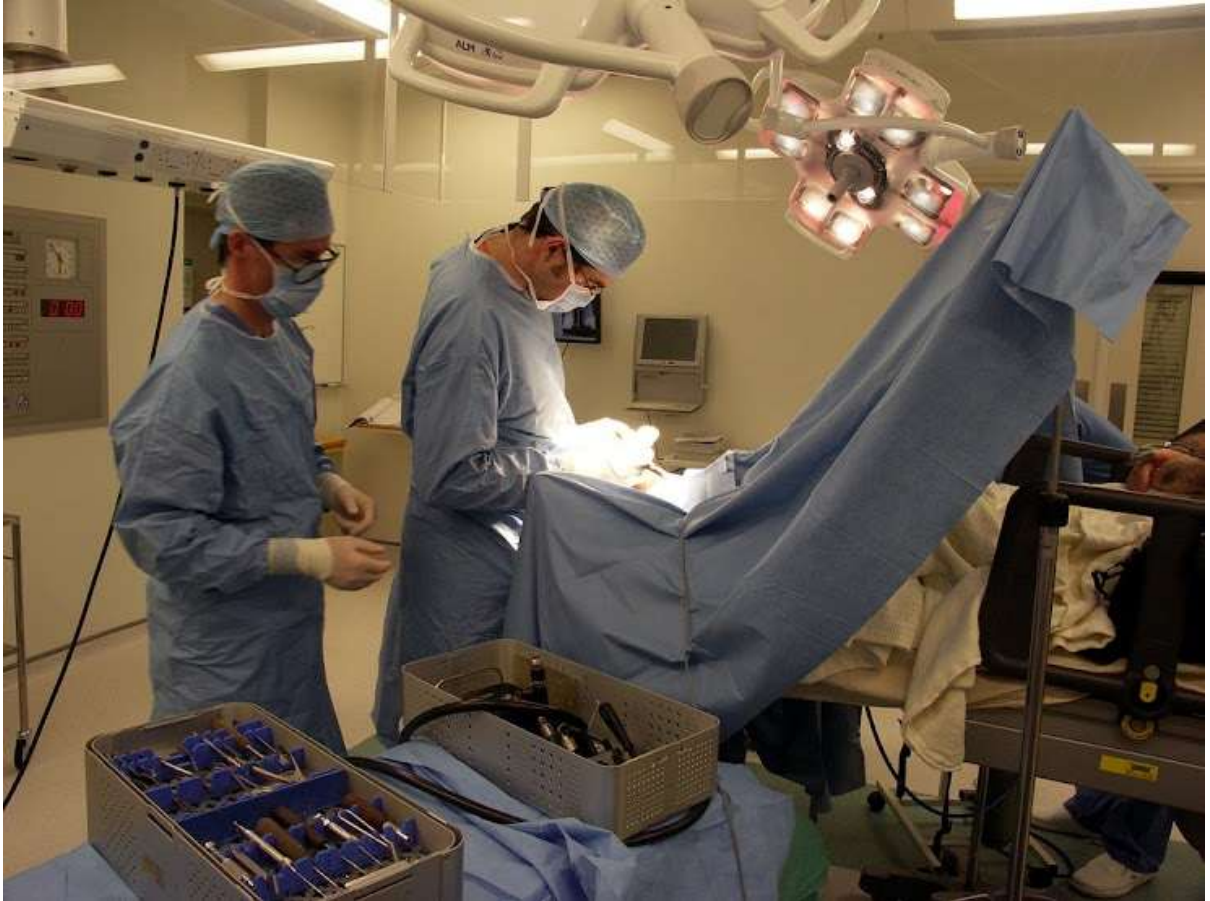

Soronként csak egy oválist jelöljön be.

|                                                          | 1                     | 2                     | 3                     | 4                     | 5                     | 6                     | 7                     | 8                     |
|----------------------------------------------------------|-----------------------|-----------------------|-----------------------|-----------------------|-----------------------|-----------------------|-----------------------|-----------------------|
| - valence<br>(how pleasant or unpleasant the picture is) | <input type="radio"/> |
| - arousal<br>(how intensely emotional the image evokes)  | <input type="radio"/> |
| - threat<br>(how threatening you find the image)         | <input type="radio"/> |
| - disgust<br>(how disgusting)                            | <input type="radio"/> |

**you find  
the image)**



**Rate the  
picture  
below!**

Please rate the images presented in the questionnaire on a nine-point scale along the following dimensions:

- valence (how pleasant or unpleasant the picture is)
- arousal (how intensely emotional the image evokes)
- threat (how threatening you find the image)
- disgust (how disgusting you find the image)

where:

Valence:

1=disgust/negative

5=neutral

9=pleasant/positive

Arousal:

1=calm/peaceful

5=neutral

9=excited/excited

Threat:

1=unthreatening

9=threatening

Disgust

1 = not disgusting

9 = disgusting

## 89. Picture 8 \*

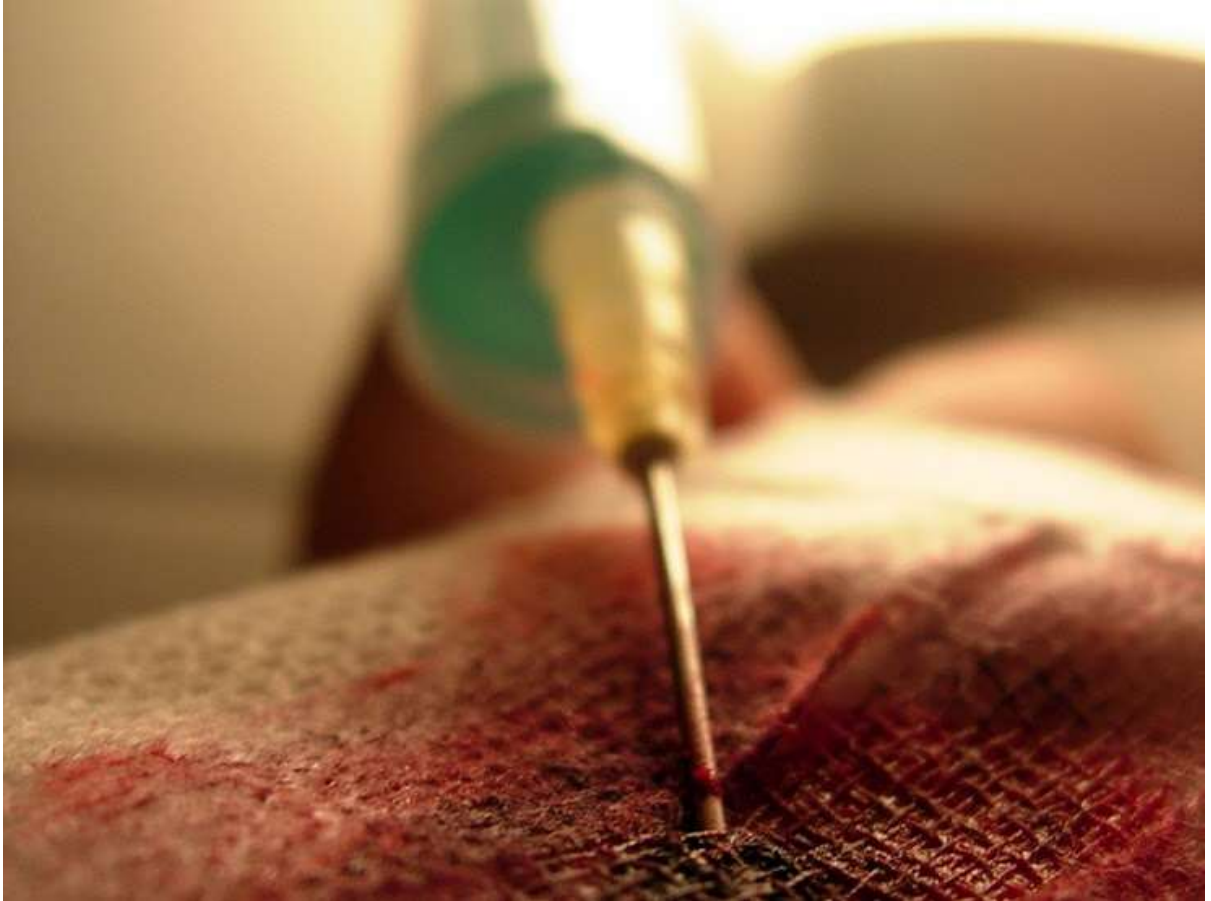

Soronként csak egy oválist jelöljön be.

|                                                          | 1                     | 2                     | 3                     | 4                     | 5                     | 6                     | 7                     | 8                     |
|----------------------------------------------------------|-----------------------|-----------------------|-----------------------|-----------------------|-----------------------|-----------------------|-----------------------|-----------------------|
| - valence<br>(how pleasant or unpleasant the picture is) | <input type="radio"/> |
| - arousal<br>(how intensely emotional the image evokes)  | <input type="radio"/> |
| - threat<br>(how threatening you find the image)         | <input type="radio"/> |
| - disgust<br>(how disgusting)                            | <input type="radio"/> |

**you find  
the image)**



**Rate the  
picture  
below!**

Please rate the images presented in the questionnaire on a nine-point scale along the following dimensions:

- valence (how pleasant or unpleasant the picture is)
- arousal (how intensely emotional the image evokes)
- threat (how threatening you find the image)
- disgust (how disgusting you find the image)

where:

Valence:

1=disgust/negative

5=neutral

9=pleasant/positive

Arousal:

1=calm/peaceful

5=neutral

9=excited/excited

Threat:

1=unthreatening

9=threatening

Disgust

1 = not disgusting

9 = disgusting

90. Picture 9 \*

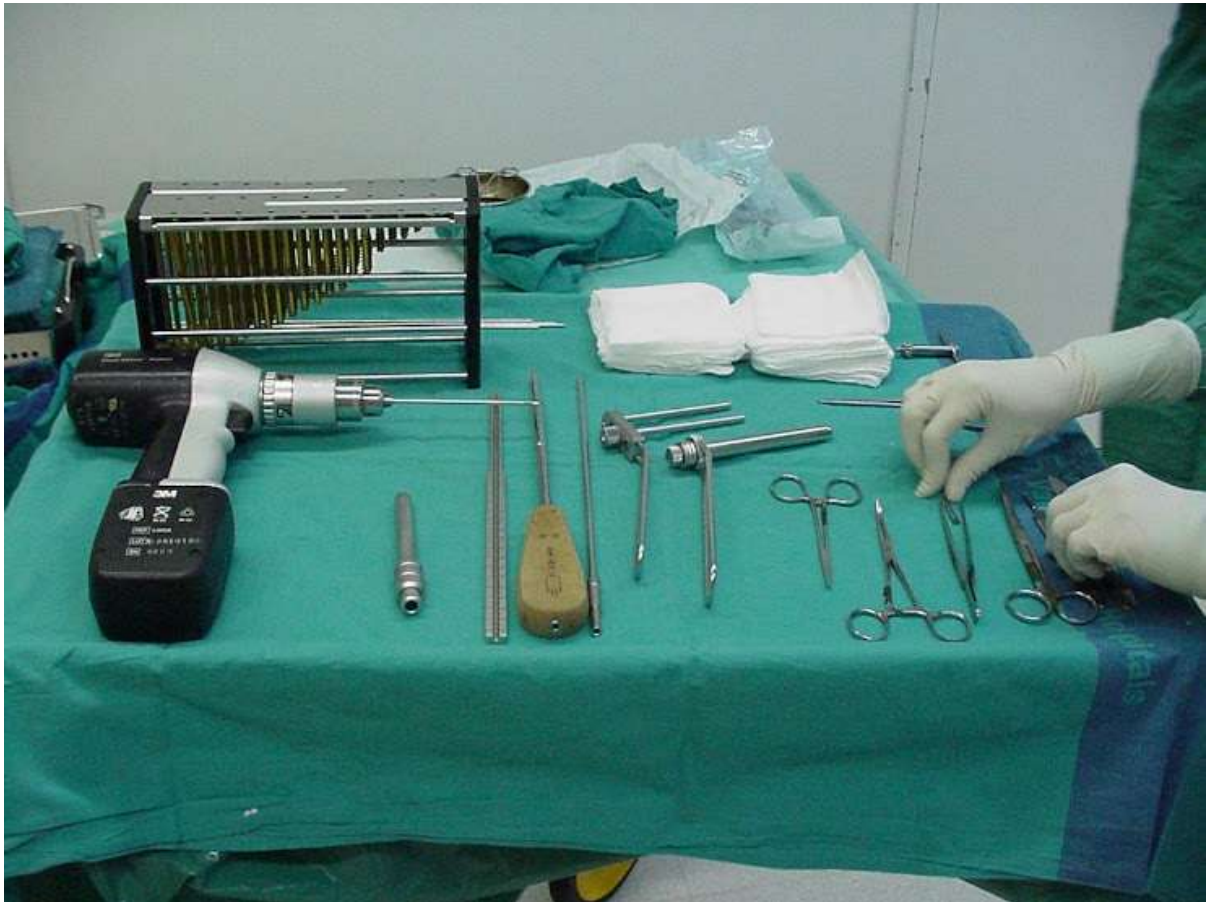

Soronként csak egy oválist jelöljön be.

|                                                          | 1                     | 2                     | 3                     | 4                     | 5                     | 6                     | 7                     | 8                     |
|----------------------------------------------------------|-----------------------|-----------------------|-----------------------|-----------------------|-----------------------|-----------------------|-----------------------|-----------------------|
| - valence<br>(how pleasant or unpleasant the picture is) | <input type="radio"/> |
| - arousal<br>(how intensely emotional the image evokes)  | <input type="radio"/> |
| - threat<br>(how threatening you find the image)         | <input type="radio"/> |
| - disgust<br>(how disgusting)                            | <input type="radio"/> |

**you find  
the image)**



**Rate the  
picture  
below!**

Please rate the images presented in the questionnaire on a nine-point scale along the following dimensions:

- valence (how pleasant or unpleasant the picture is)
- arousal (how intensely emotional the image evokes)
- threat (how threatening you find the image)
- disgust (how disgusting you find the image)

where:

Valence:

1=disgust/negative

5=neutral

9=pleasant/positive

Arousal:

1=calm/peaceful

5=neutral

9=excited/excited

Threat:

1=unthreatening

9=threatening

Disgust

1 = not disgusting

9 = disgusting

## 91. Picture 10 \*

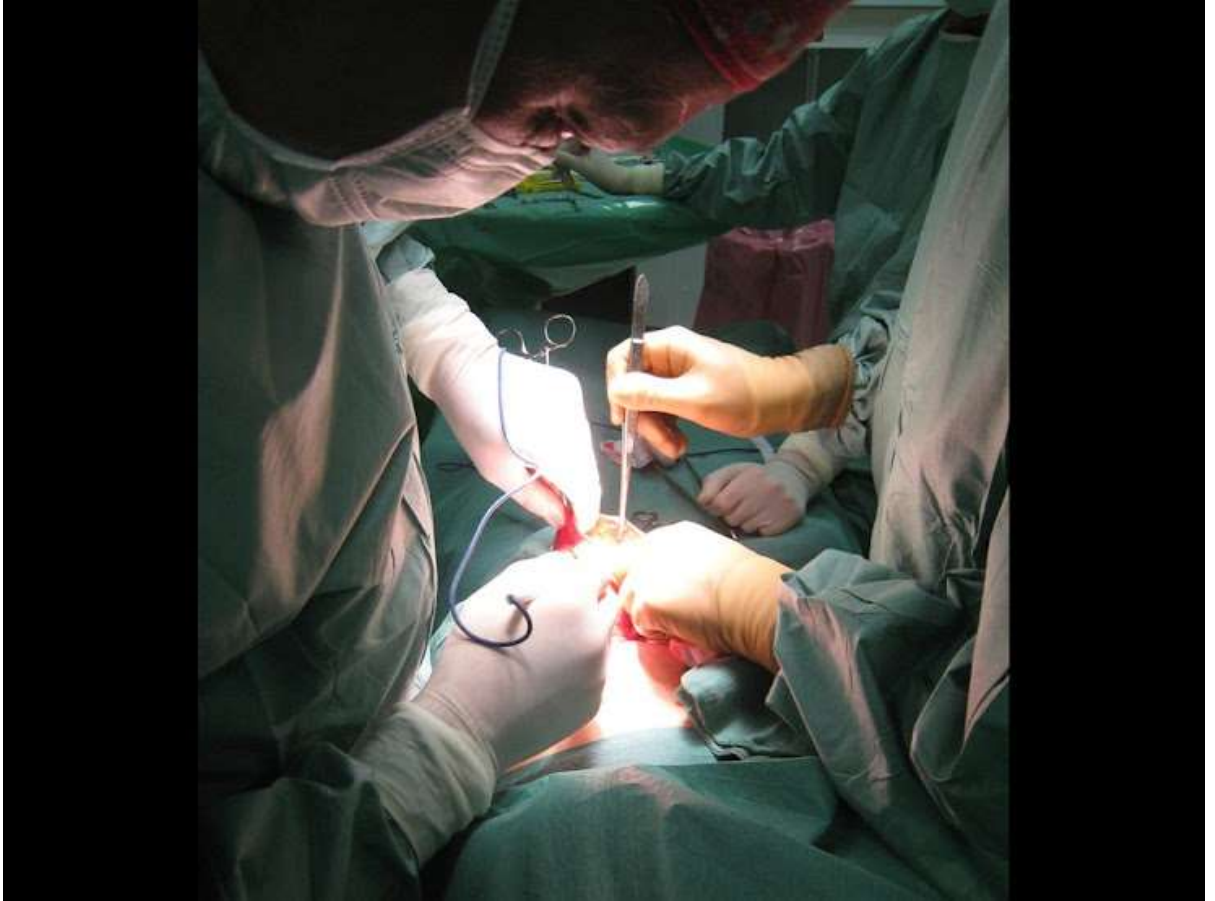

Soronként csak egy oválist jelöljön be.

|                                                          | 1                     | 2                     | 3                     | 4                     | 5                     | 6                     | 7                     | 8                     |
|----------------------------------------------------------|-----------------------|-----------------------|-----------------------|-----------------------|-----------------------|-----------------------|-----------------------|-----------------------|
| - valence<br>(how pleasant or unpleasant the picture is) | <input type="radio"/> |
| - arousal<br>(how intensely emotional the image evokes)  | <input type="radio"/> |
| - threat<br>(how threatening you find the image)         | <input type="radio"/> |
| - disgust<br>(how disgusting)                            | <input type="radio"/> |



**you find  
the image)**



**Rate the  
picture  
below!**

Please rate the images presented in the questionnaire on a nine-point scale along the following dimensions:

- valence (how pleasant or unpleasant the picture is)
- arousal (how intensely emotional the image evokes)
- threat (how threatening you find the image)
- disgust (how disgusting you find the image)

where:

Valence:

1=disgust/negative

5=neutral

9=pleasant/positive

Arousal:

1=calm/peaceful

5=neutral

9=excited/excited

Threat:

1=unthreatening

9=threatening

Disgust

1 = not disgusting

9 = disgusting

## 92. Picture 11 \*

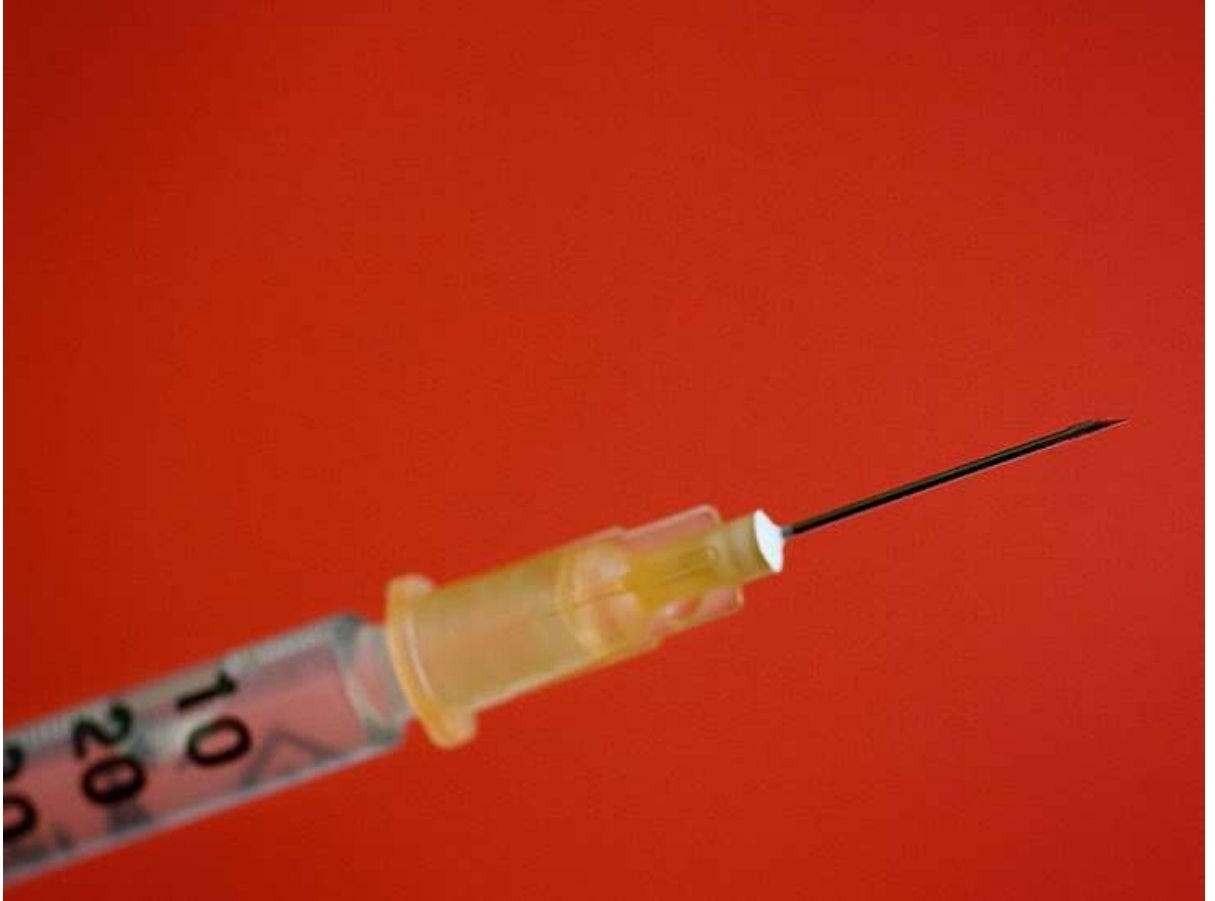

Soronként csak egy oválist jelöljön be.

|                                                          | 1                     | 2                     | 3                     | 4                     | 5                     | 6                     | 7                     | 8                     |
|----------------------------------------------------------|-----------------------|-----------------------|-----------------------|-----------------------|-----------------------|-----------------------|-----------------------|-----------------------|
| - valence<br>(how pleasant or unpleasant the picture is) | <input type="radio"/> |
| - arousal<br>(how intensely emotional the image evokes)  | <input type="radio"/> |
| - threat<br>(how threatening you find the image)         | <input type="radio"/> |
| - disgust<br>(how disgusting)                            | <input type="radio"/> |

**you find  
the image)**



**Rate the  
picture  
below!**

Please rate the images presented in the questionnaire on a nine-point scale along the following dimensions:

- valence (how pleasant or unpleasant the picture is)
- arousal (how intensely emotional the image evokes)
- threat (how threatening you find the image)
- disgust (how disgusting you find the image)

where:

Valence:

1=disgust/negative

5=neutral

9=pleasant/positive

Arousal:

1=calm/peaceful

5=neutral

9=excited/excited

Threat:

1=unthreatening

9=threatening

Disgust

1 = not disgusting

9 = disgusting

## 93. Picture 12 \*

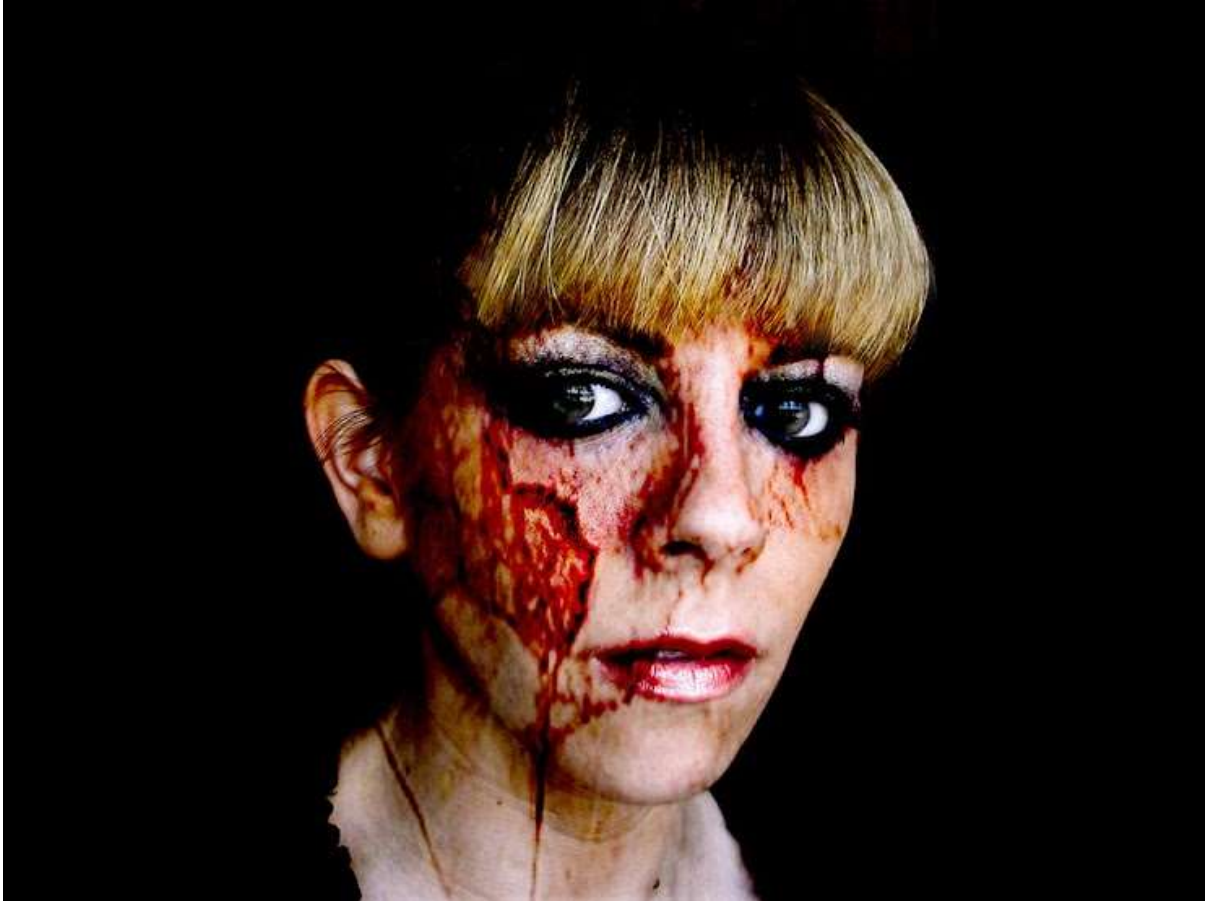

Soronként csak egy oválist jelöljön be.

|                                                          | 1                     | 2                     | 3                     | 4                     | 5                     | 6                     | 7                     | 8                     |
|----------------------------------------------------------|-----------------------|-----------------------|-----------------------|-----------------------|-----------------------|-----------------------|-----------------------|-----------------------|
| - valence<br>(how pleasant or unpleasant the picture is) | <input type="radio"/> |
| - arousal<br>(how intensely emotional the image evokes)  | <input type="radio"/> |
| - threat<br>(how threatening you find the image)         | <input type="radio"/> |
| - disgust<br>(how disgusting)                            | <input type="radio"/> |

**you find  
the image)**



**Rate the  
picture  
below!**

Please rate the images presented in the questionnaire on a nine-point scale along the following dimensions:

- valence (how pleasant or unpleasant the picture is)
- arousal (how intensely emotional the image evokes)
- threat (how threatening you find the image)
- disgust (how disgusting you find the image)

where:

Valence:

1=disgust/negative

5=neutral

9=pleasant/positive

Arousal:

1=calm/peaceful

5=neutral

9=excited/excited

Threat:

1=unthreatening

9=threatening

Disgust

1 = not disgusting

9 = disgusting

## 94. Picture 13 \*

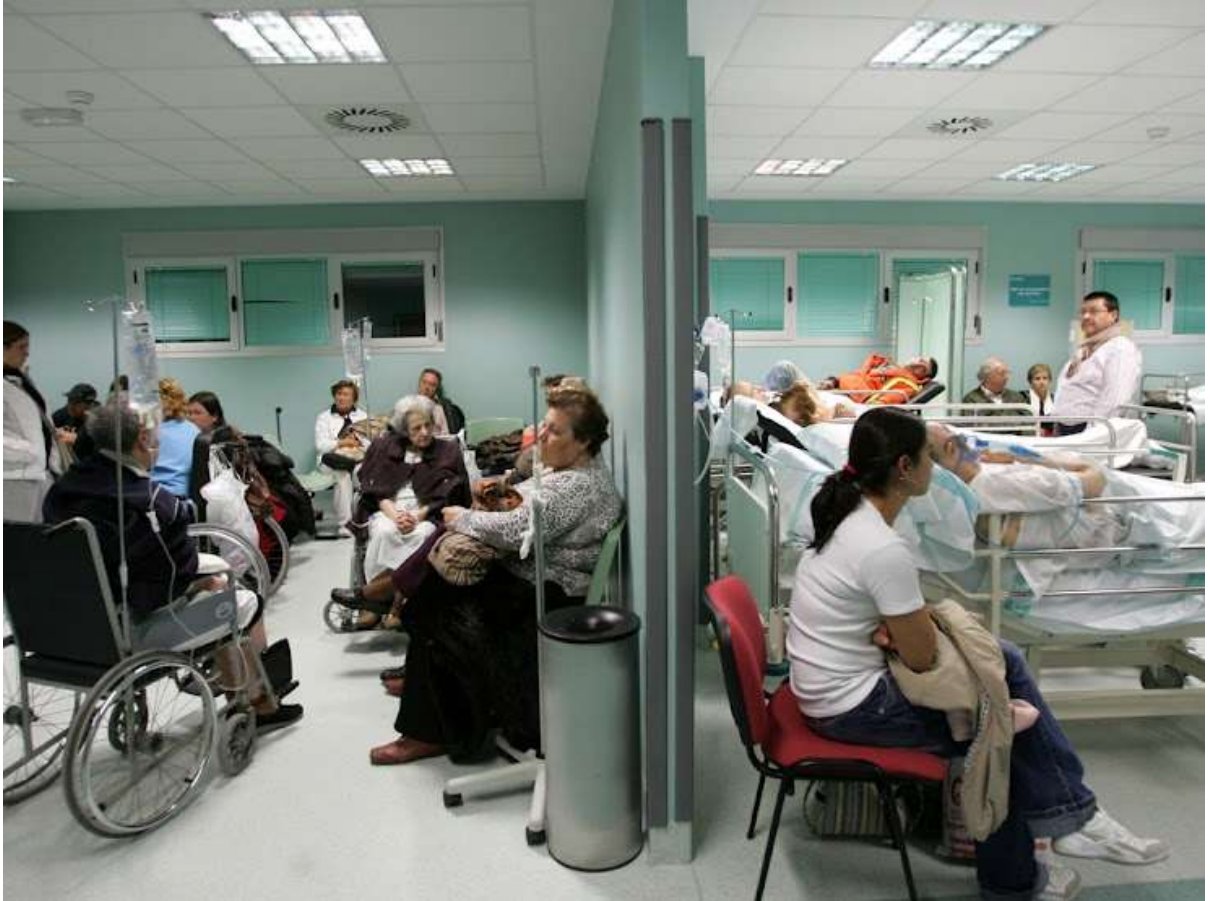

Soronként csak egy oválist jelöljön be.

|                                                          | 1                     | 2                     | 3                     | 4                     | 5                     | 6                     | 7                     | 8                     |
|----------------------------------------------------------|-----------------------|-----------------------|-----------------------|-----------------------|-----------------------|-----------------------|-----------------------|-----------------------|
| - valence<br>(how pleasant or unpleasant the picture is) | <input type="radio"/> |
| - arousal<br>(how intensely emotional the image evokes)  | <input type="radio"/> |
| - threat<br>(how threatening you find the image)         | <input type="radio"/> |
| - disgust<br>(how disgusting)                            | <input type="radio"/> |

**you find  
the image)**



**Rate the  
picture  
below!**

Please rate the images presented in the questionnaire on a nine-point scale along the following dimensions:

- valence (how pleasant or unpleasant the picture is)
- arousal (how intensely emotional the image evokes)
- threat (how threatening you find the image)
- disgust (how disgusting you find the image)

where:

Valence:

1=disgust/negative

5=neutral

9=pleasant/positive

Arousal:

1=calm/peaceful

5=neutral

9=excited/excited

Threat:

1=unthreatening

9=threatening

Disgust

1 = not disgusting

9 = disgusting

## 95. Picture 14 \*

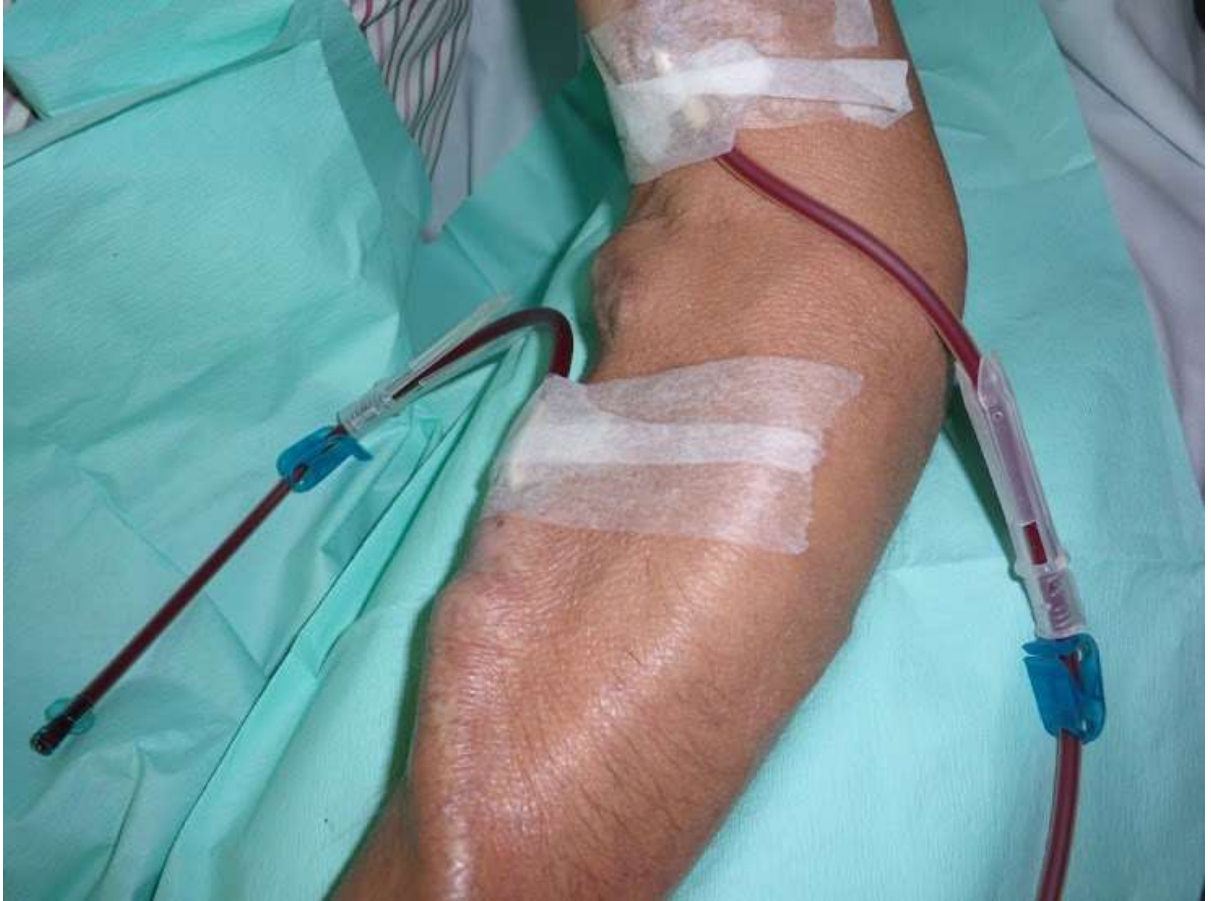

Soronként csak egy oválist jelöljön be.

|                                                          | 1                     | 2                     | 3                     | 4                     | 5                     | 6                     | 7                     | 8                     |
|----------------------------------------------------------|-----------------------|-----------------------|-----------------------|-----------------------|-----------------------|-----------------------|-----------------------|-----------------------|
| - valence<br>(how pleasant or unpleasant the picture is) | <input type="radio"/> |
| - arousal<br>(how intensely emotional the image evokes)  | <input type="radio"/> |
| - threat<br>(how threatening you find the image)         | <input type="radio"/> |
| - disgust<br>(how disgusting)                            | <input type="radio"/> |



**you find  
the image)**



**Rate the  
picture  
below!**

Please rate the images presented in the questionnaire on a nine-point scale along the following dimensions:

- valence (how pleasant or unpleasant the picture is)
- arousal (how intensely emotional the image evokes)
- threat (how threatening you find the image)
- disgust (how disgusting you find the image)

where:

Valence:

1=disgust/negative

5=neutral

9=pleasant/positive

Arousal:

1=calm/peaceful

5=neutral

9=excited/excited

Threat:

1=unthreatening

9=threatening

Disgust

1 = not disgusting

9 = disgusting

## 96. Picture 15 \*

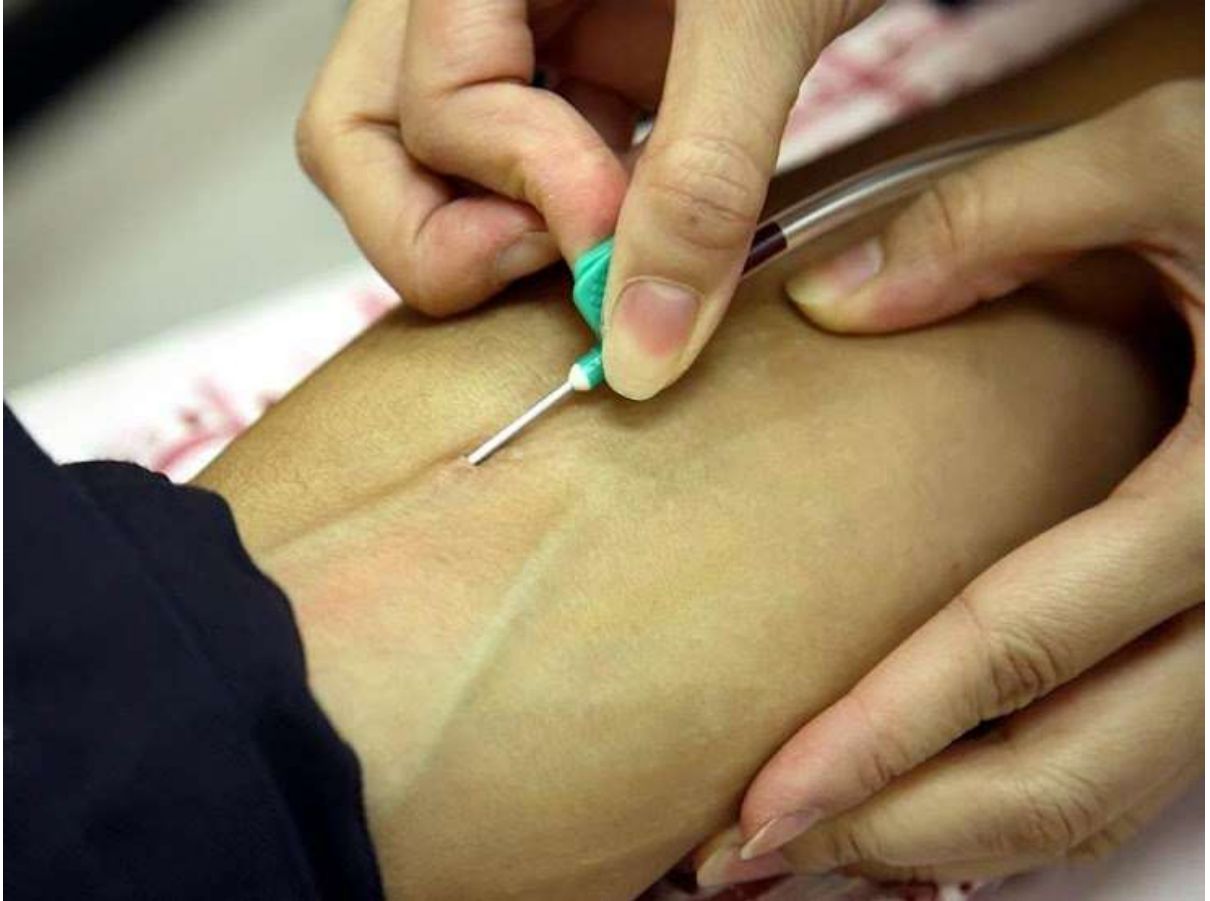

Soronként csak egy oválist jelöljön be.

|                                                          | 1                     | 2                     | 3                     | 4                     | 5                     | 6                     | 7                     | 8                     |
|----------------------------------------------------------|-----------------------|-----------------------|-----------------------|-----------------------|-----------------------|-----------------------|-----------------------|-----------------------|
| - valence<br>(how pleasant or unpleasant the picture is) | <input type="radio"/> |
| - arousal<br>(how intensely emotional the image evokes)  | <input type="radio"/> |
| - threat<br>(how threatening you find the image)         | <input type="radio"/> |
| - disgust<br>(how disgusting)                            | <input type="radio"/> |

**you find  
the image)**



**Rate the  
picture  
below!**

Please rate the images presented in the questionnaire on a nine-point scale along the following dimensions:

- valence (how pleasant or unpleasant the picture is)
- arousal (how intensely emotional the image evokes)
- threat (how threatening you find the image)
- disgust (how disgusting you find the image)

where:

Valence:

1=disgust/negative

5=neutral

9=pleasant/positive

Arousal:

1=calm/peaceful

5=neutral

9=excited/excited

Threat:

1=unthreatening

9=threatening

Disgust

1 = not disgusting

9 = disgusting

## 97. Picture 16 \*

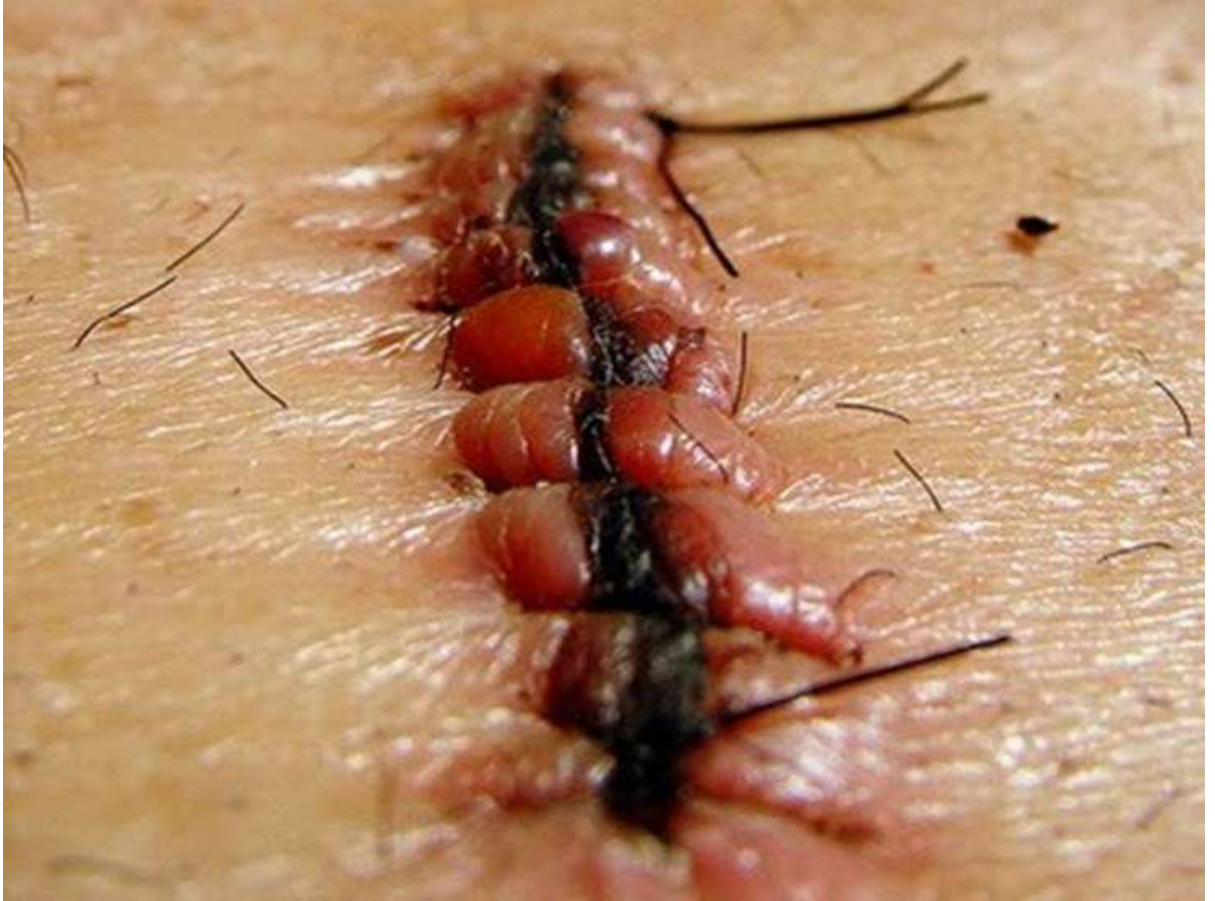

Soronként csak egy oválist jelöljön be.

|                                                          | 1                     | 2                     | 3                     | 4                     | 5                     | 6                     | 7                     | 8                     |
|----------------------------------------------------------|-----------------------|-----------------------|-----------------------|-----------------------|-----------------------|-----------------------|-----------------------|-----------------------|
| - valence<br>(how pleasant or unpleasant the picture is) | <input type="radio"/> |
| - arousal<br>(how intensely emotional the image evokes)  | <input type="radio"/> |
| - threat<br>(how threatening you find the image)         | <input type="radio"/> |
| - disgust<br>(how disgusting)                            | <input type="radio"/> |

**you find  
the image)**



**Rate the  
picture  
below!**

Please rate the images presented in the questionnaire on a nine-point scale along the following dimensions:

- valence (how pleasant or unpleasant the picture is)
- arousal (how intensely emotional the image evokes)
- threat (how threatening you find the image)
- disgust (how disgusting you find the image)

where:

Valence:

1=disgust/negative

5=neutral

9=pleasant/positive

Arousal:

1=calm/peaceful

5=neutral

9=excited/excited

Threat:

1=unthreatening

9=threatening

Disgust

1 = not disgusting

9 = disgusting

## 98. Picture 17 \*

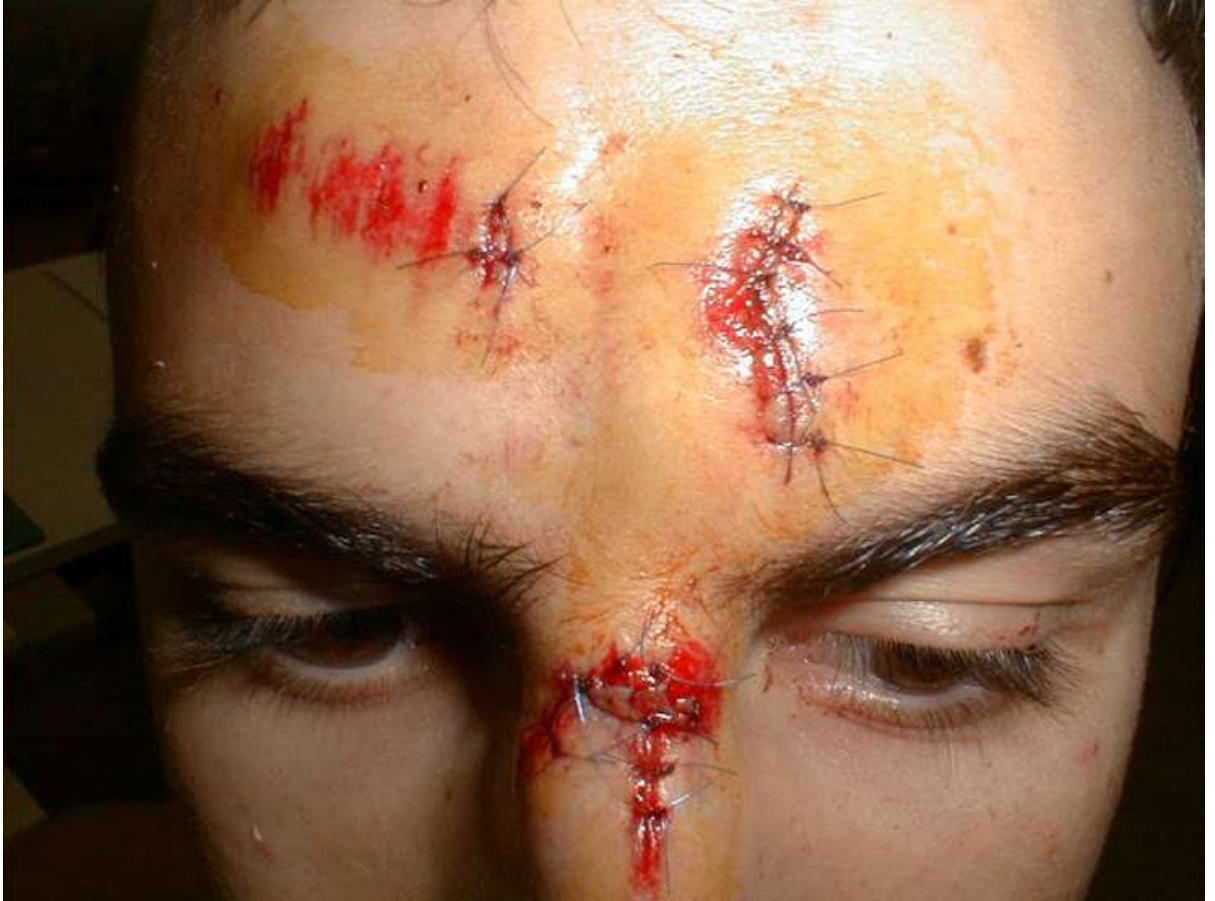

Soronként csak egy oválist jelöljön be.

|                                                          | 1                     | 2                     | 3                     | 4                     | 5                     | 6                     | 7                     | 8                     |
|----------------------------------------------------------|-----------------------|-----------------------|-----------------------|-----------------------|-----------------------|-----------------------|-----------------------|-----------------------|
| - valence<br>(how pleasant or unpleasant the picture is) | <input type="radio"/> |
| - arousal<br>(how intensely emotional the image evokes)  | <input type="radio"/> |
| - threat<br>(how threatening you find the image)         | <input type="radio"/> |
| - disgust<br>(how disgusting)                            | <input type="radio"/> |

**you find  
the image)**



**Rate the  
picture  
below!**

Please rate the images presented in the questionnaire on a nine-point scale along the following dimensions:

- valence (how pleasant or unpleasant the picture is)
- arousal (how intensely emotional the image evokes)
- threat (how threatening you find the image)
- disgust (how disgusting you find the image)

where:

Valence:

1=disgust/negative

5=neutral

9=pleasant/positive

Arousal:

1=calm/peaceful

5=neutral

9=excited/excited

Threat:

1=unthreatening

9=threatening

Disgust

1 = not disgusting

9 = disgusting

## 99. Picture 18 \*

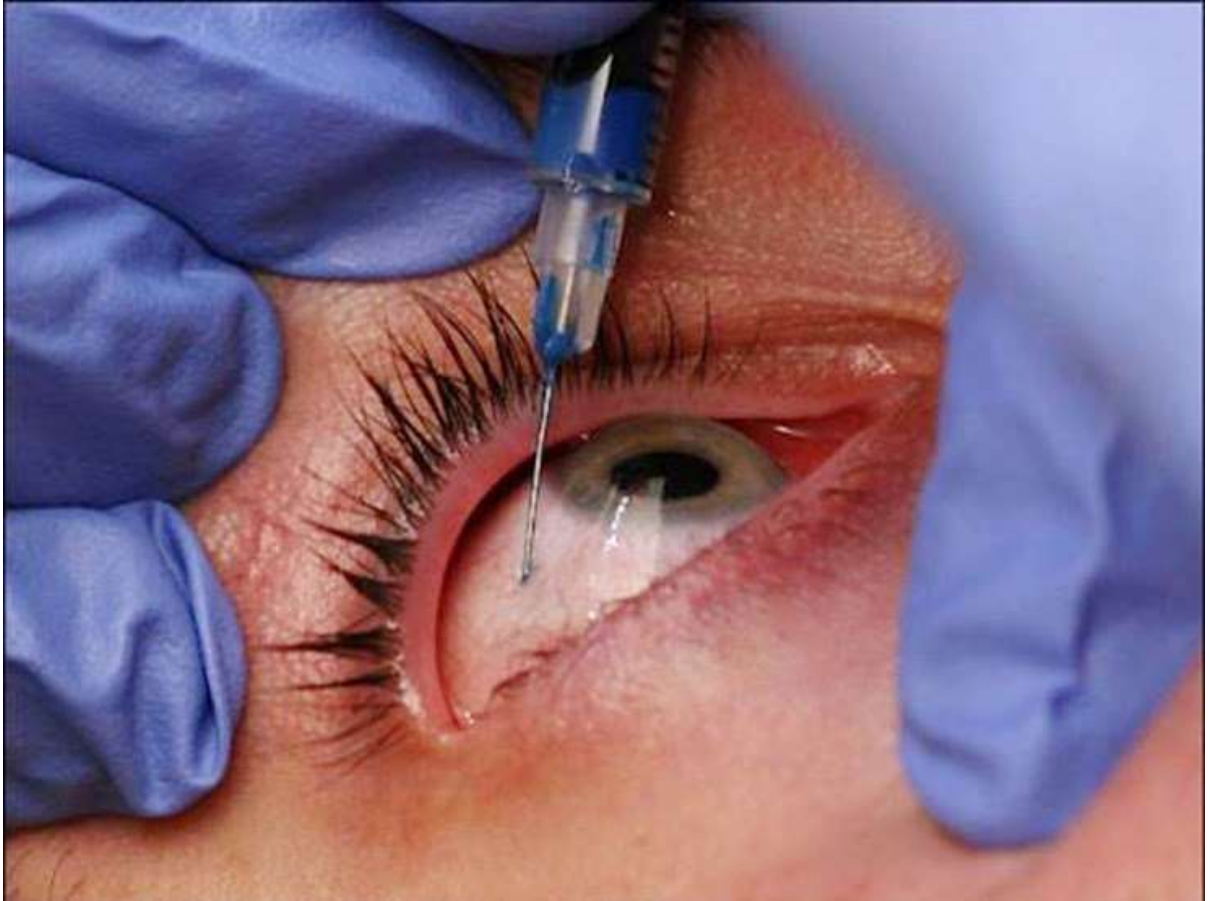

Soronként csak egy oválist jelöljön be.

|                                                          | 1                     | 2                     | 3                     | 4                     | 5                     | 6                     | 7                     | 8                     |
|----------------------------------------------------------|-----------------------|-----------------------|-----------------------|-----------------------|-----------------------|-----------------------|-----------------------|-----------------------|
| - valence<br>(how pleasant or unpleasant the picture is) | <input type="radio"/> |
| - arousal<br>(how intensely emotional the image evokes)  | <input type="radio"/> |
| - threat<br>(how threatening you find the image)         | <input type="radio"/> |
| - disgust<br>(how disgusting)                            | <input type="radio"/> |



**you find  
the image)**



**Rate the  
picture  
below!**

Please rate the images presented in the questionnaire on a nine-point scale along the following dimensions:

- valence (how pleasant or unpleasant the picture is)
- arousal (how intensely emotional the image evokes)
- threat (how threatening you find the image)
- disgust (how disgusting you find the image)

where:

Valence:

1=disgust/negative

5=neutral

9=pleasant/positive

Arousal:

1=calm/peaceful

5=neutral

9=excited/excited

Threat:

1=unthreatening

9=threatening

Disgust

1 = not disgusting

9 = disgusting

100. Picture 19 \*

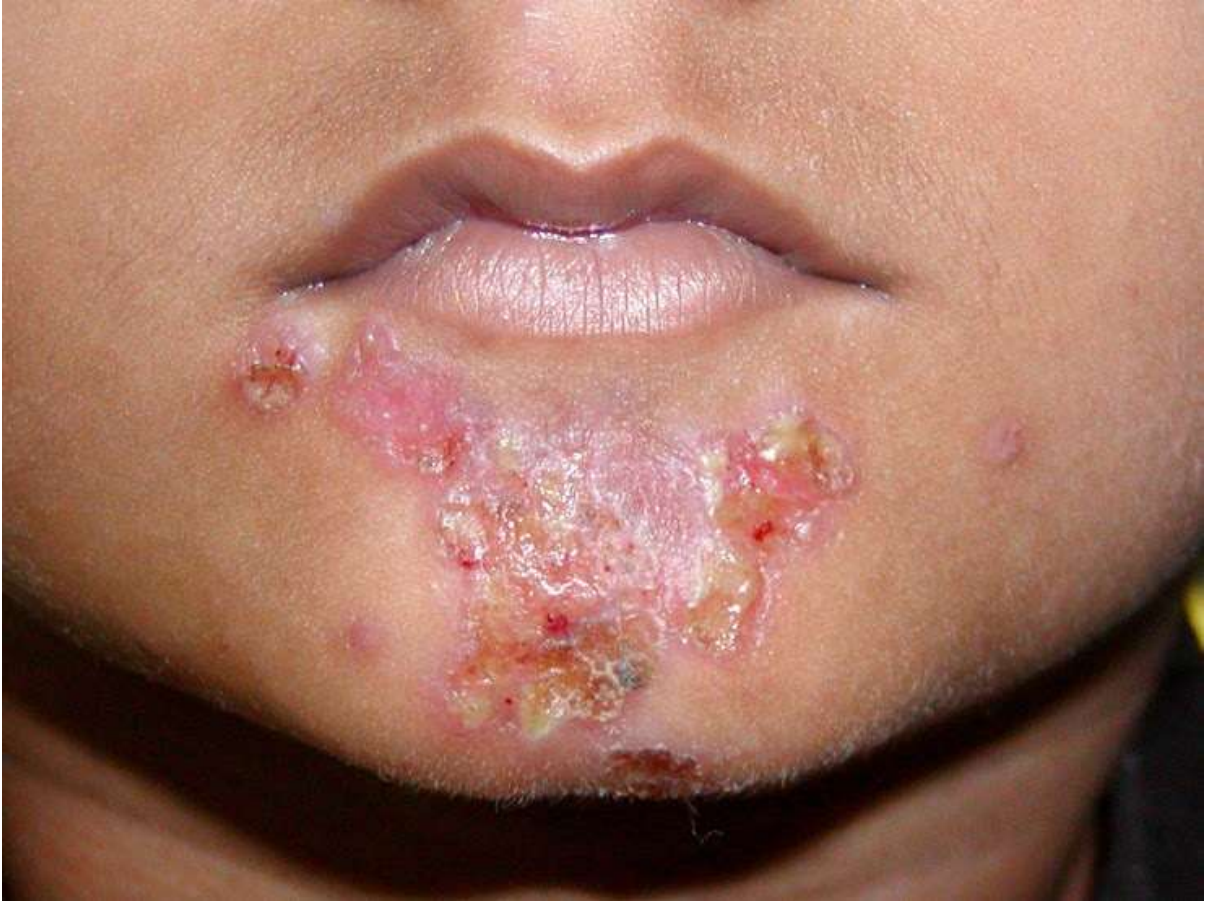

Soronként csak egy oválist jelöljön be.

|                                                          | 1                     | 2                     | 3                     | 4                     | 5                     | 6                     | 7                     | 8                     |
|----------------------------------------------------------|-----------------------|-----------------------|-----------------------|-----------------------|-----------------------|-----------------------|-----------------------|-----------------------|
| - valence<br>(how pleasant or unpleasant the picture is) | <input type="radio"/> |
| - arousal<br>(how intensely emotional the image evokes)  | <input type="radio"/> |
| - threat<br>(how threatening you find the image)         | <input type="radio"/> |
| - disgust<br>(how disgusting)                            | <input type="radio"/> |

**you find  
the image)**

**Rate the  
picture  
below!**

Please rate the images presented in the questionnaire on a nine-point scale along the following dimensions:

- valence (how pleasant or unpleasant the picture is)
- arousal (how intensely emotional the image evokes)
- threat (how threatening you find the image)
- disgust (how disgusting you find the image)

where:

Valence:

1=disgust/negative

5=neutral

9=pleasant/positive

Arousal:

1=calm/peaceful

5=neutral

9=excited/excited

Threat:

1=unthreatening

9=threatening

Disgust

1 = not disgusting

9 = disgusting

## 101. Picture 20 \*

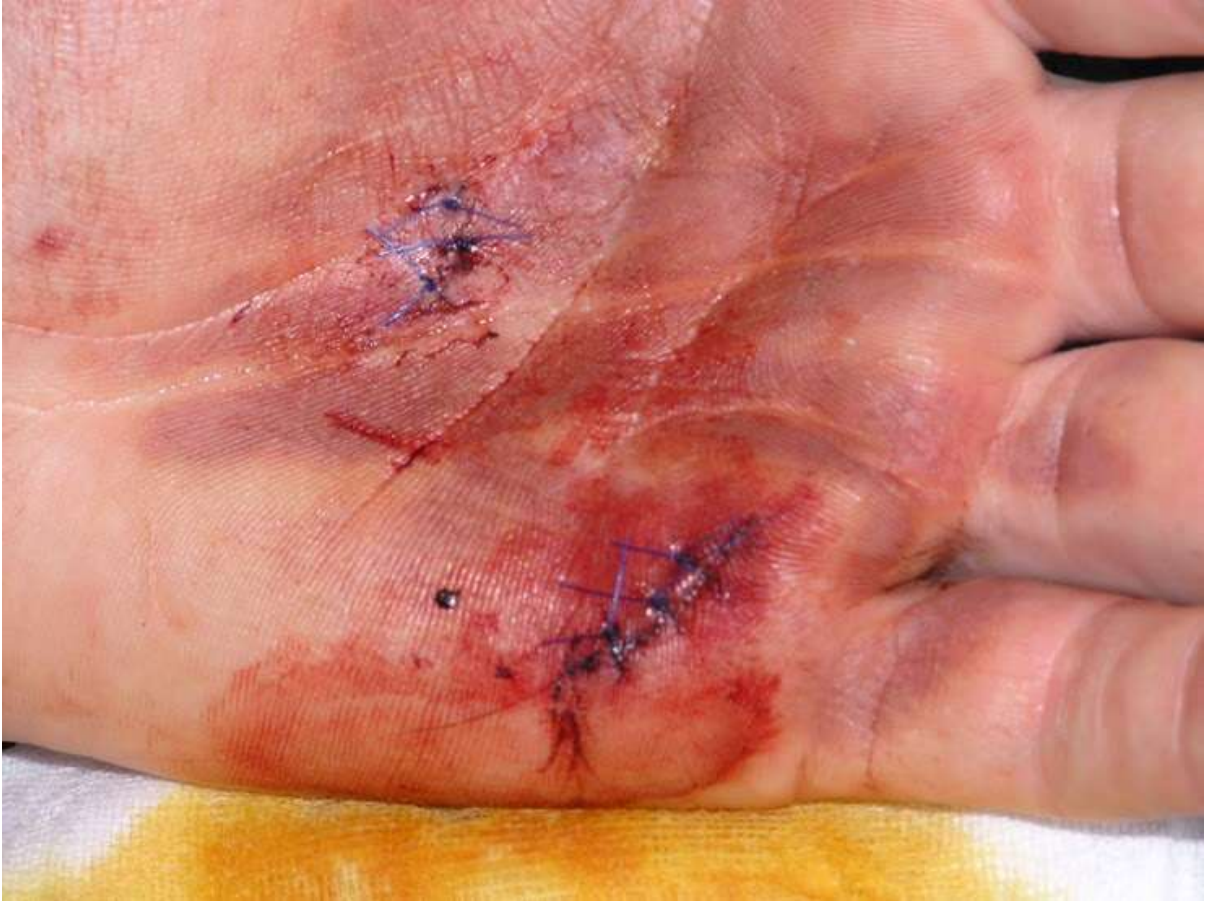

Soronként csak egy oválist jelöljön be.

|                                                          | 1                     | 2                     | 3                     | 4                     | 5                     | 6                     | 7                     | 8                     |
|----------------------------------------------------------|-----------------------|-----------------------|-----------------------|-----------------------|-----------------------|-----------------------|-----------------------|-----------------------|
| - valence<br>(how pleasant or unpleasant the picture is) | <input type="radio"/> |
| - arousal<br>(how intensely emotional the image evokes)  | <input type="radio"/> |
| - threat<br>(how threatening you find the image)         | <input type="radio"/> |
| - disgust<br>(how disgusting)                            | <input type="radio"/> |

**you find  
the image)**

**Rate the  
picture  
below!**

Please rate the images presented in the questionnaire on a nine-point scale along the following dimensions:

- valence (how pleasant or unpleasant the picture is)
- arousal (how intensely emotional the image evokes)
- threat (how threatening you find the image)
- disgust (how disgusting you find the image)

where:

Valence:

1=disgust/negative

5=neutral

9=pleasant/positive

Arousal:

1=calm/peaceful

5=neutral

9=excited/excited

Threat:

1=unthreatening

9=threatening

Disgust

1 = not disgusting

9 = disgusting

## 102. Picture 21 \*

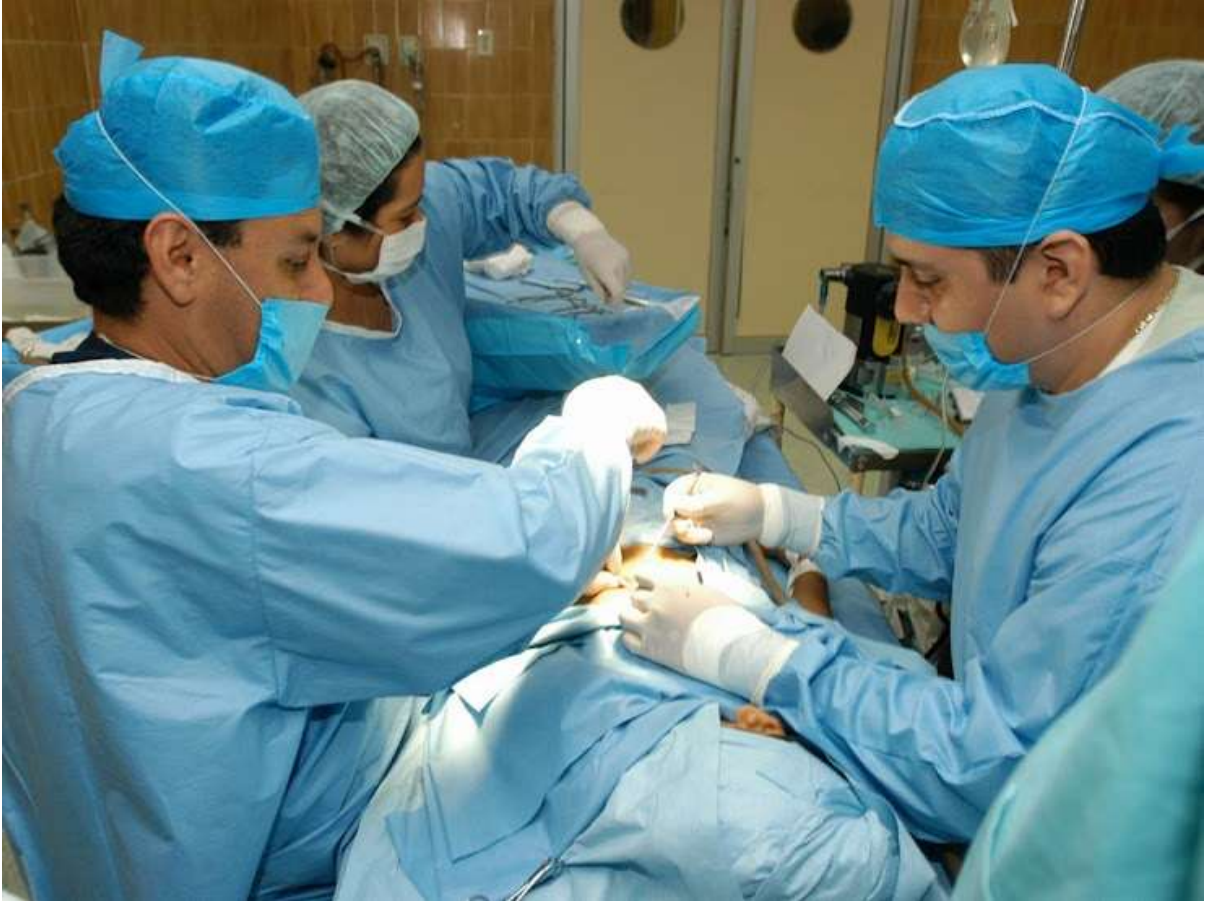

Soronként csak egy oválist jelöljön be.

|                                                          | 1                     | 2                     | 3                     | 4                     | 5                     | 6                     | 7                     | 8                     |
|----------------------------------------------------------|-----------------------|-----------------------|-----------------------|-----------------------|-----------------------|-----------------------|-----------------------|-----------------------|
| - valence<br>(how pleasant or unpleasant the picture is) | <input type="radio"/> |
| - arousal<br>(how intensely emotional the image evokes)  | <input type="radio"/> |
| - threat<br>(how threatening you find the image)         | <input type="radio"/> |
| - disgust<br>(how disgusting)                            | <input type="radio"/> |

**you find  
the image)**

**Rate the  
picture  
below!**

Please rate the images presented in the questionnaire on a nine-point scale along the following dimensions:

- valence (how pleasant or unpleasant the picture is)
- arousal (how intensely emotional the image evokes)
- threat (how threatening you find the image)
- disgust (how disgusting you find the image)

where:

Valence:

1=disgust/negative

5=neutral

9=pleasant/positive

Arousal:

1=calm/peaceful

5=neutral

9=excited/excited

Threat:

1=unthreatening

9=threatening

Disgust

1 = not disgusting

9 = disgusting

## 103. Picture 22 \*

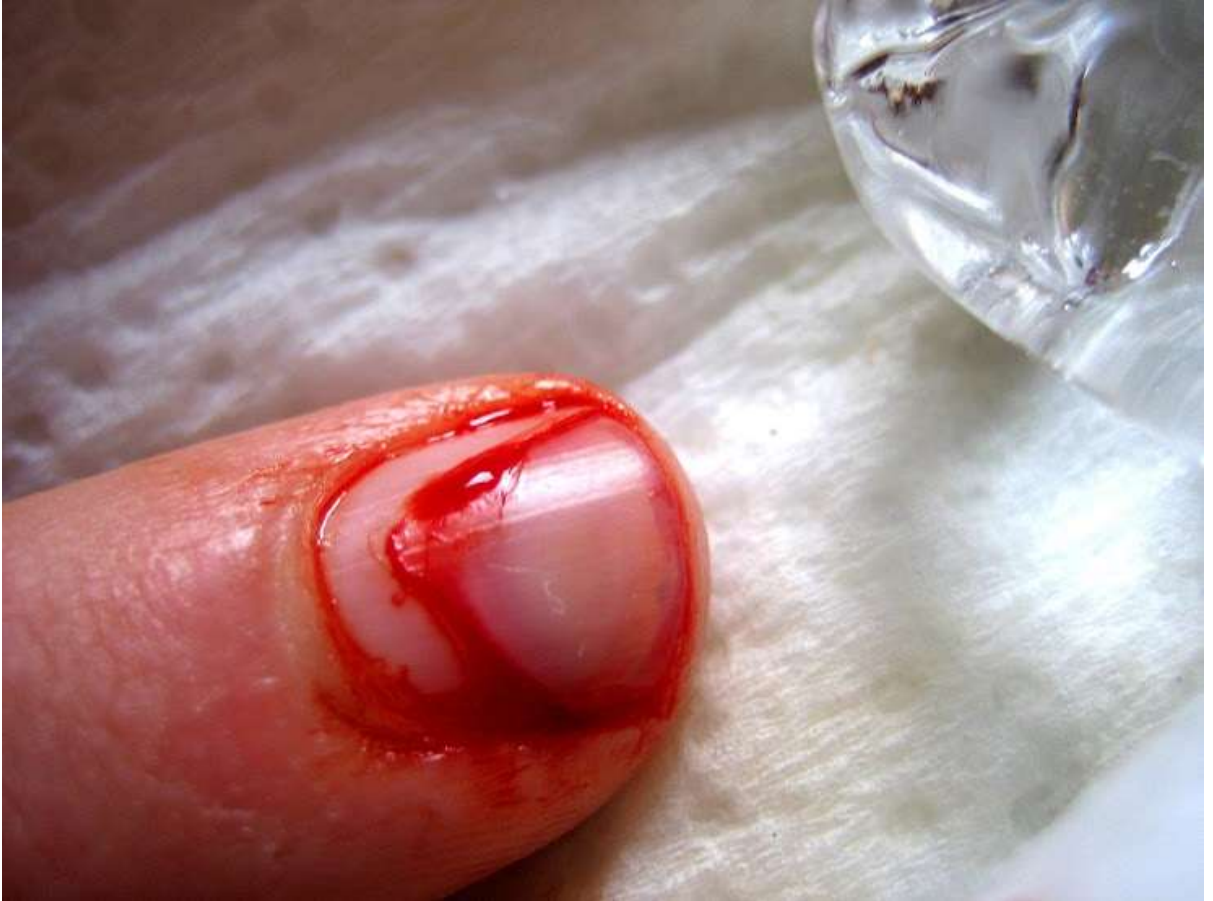

Soronként csak egy oválist jelöljön be.

|                                                          | 1                     | 2                     | 3                     | 4                     | 5                     | 6                     | 7                     | 8                     |
|----------------------------------------------------------|-----------------------|-----------------------|-----------------------|-----------------------|-----------------------|-----------------------|-----------------------|-----------------------|
| - valence<br>(how pleasant or unpleasant the picture is) | <input type="radio"/> |
| - arousal<br>(how intensely emotional the image evokes)  | <input type="radio"/> |
| - threat<br>(how threatening you find the image)         | <input type="radio"/> |
| - disgust<br>(how disgusting)                            | <input type="radio"/> |



**you find  
the image)**

**Rate the  
picture  
below!**

Please rate the images presented in the questionnaire on a nine-point scale along the following dimensions:

- valence (how pleasant or unpleasant the picture is)
- arousal (how intensely emotional the image evokes)
- threat (how threatening you find the image)
- disgust (how disgusting you find the image)

where:

Valence:

1=disgust/negative

5=neutral

9=pleasant/positive

Arousal:

1=calm/peaceful

5=neutral

9=excited/excited

Threat:

1=unthreatening

9=threatening

Disgust

1 = not disgusting

9 = disgusting

## 104. Picture 23 \*

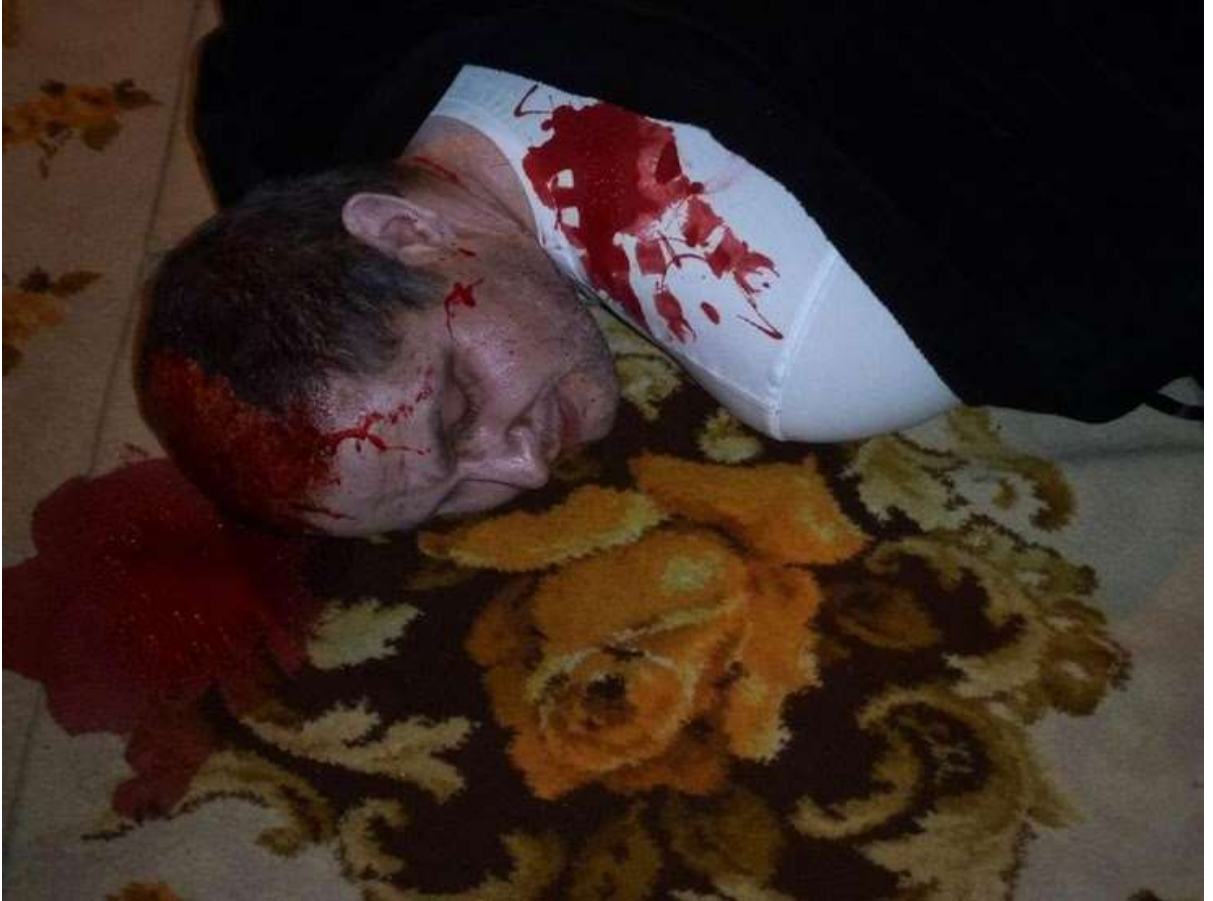

Soronként csak egy oválist jelöljön be.

|                                                          | 1                     | 2                     | 3                     | 4                     | 5                     | 6                     | 7                     | 8                     |
|----------------------------------------------------------|-----------------------|-----------------------|-----------------------|-----------------------|-----------------------|-----------------------|-----------------------|-----------------------|
| - valence<br>(how pleasant or unpleasant the picture is) | <input type="radio"/> |
| - arousal<br>(how intensely emotional the image evokes)  | <input type="radio"/> |
| - threat<br>(how threatening you find the image)         | <input type="radio"/> |
| - disgust<br>(how disgusting)                            | <input type="radio"/> |

**you find  
the image)**

**Rate the  
picture  
below!**

Please rate the images presented in the questionnaire on a nine-point scale along the following dimensions:

- valence (how pleasant or unpleasant the picture is)
- arousal (how intensely emotional the image evokes)
- threat (how threatening you find the image)
- disgust (how disgusting you find the image)

where:

Valence:

1=disgust/negative

5=neutral

9=pleasant/positive

Arousal:

1=calm/peaceful

5=neutral

9=excited/excited

Threat:

1=unthreatening

9=threatening

Disgust

1 = not disgusting

9 = disgusting

## 105. Picture 24 \*

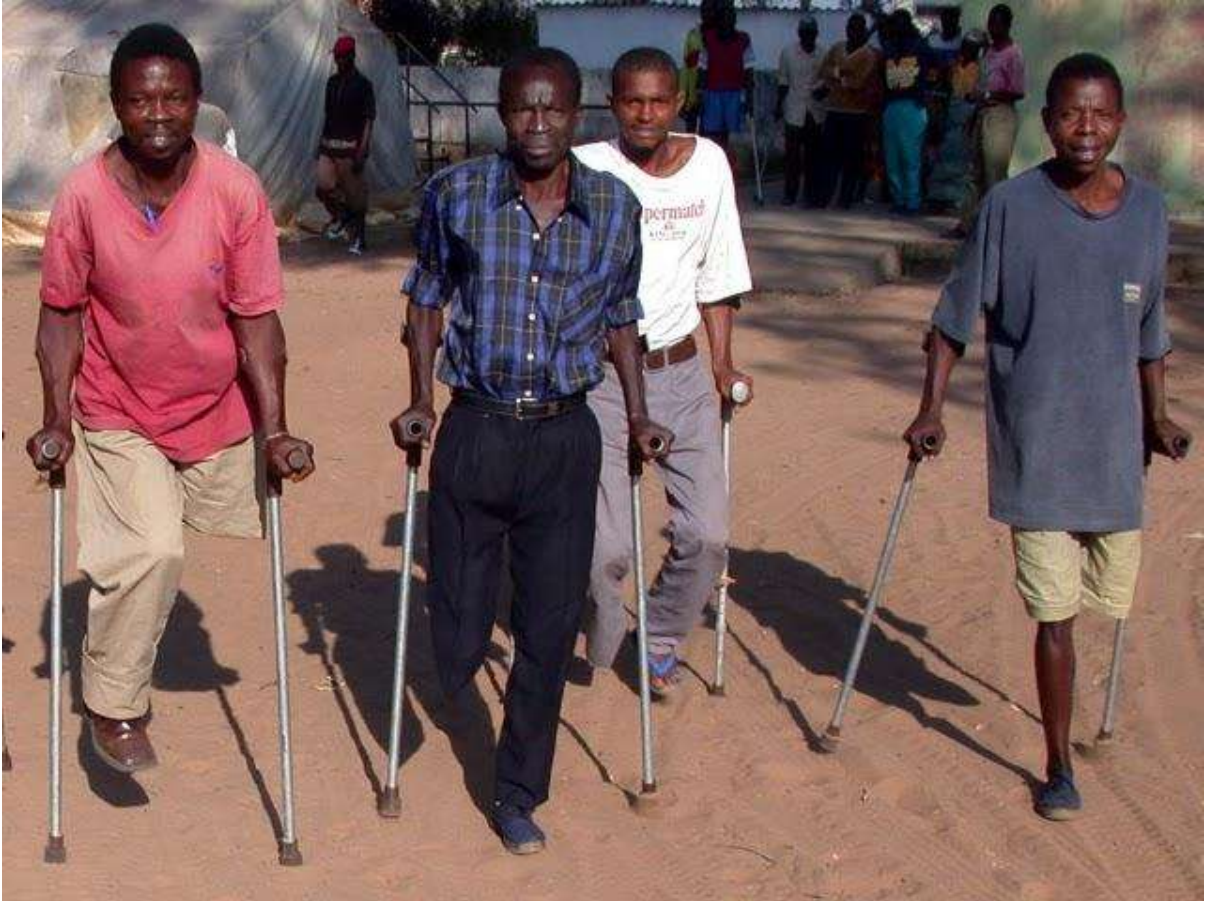

Soronként csak egy oválist jelöljön be.

|                                                          | 1                     | 2                     | 3                     | 4                     | 5                     | 6                     | 7                     | 8                     |
|----------------------------------------------------------|-----------------------|-----------------------|-----------------------|-----------------------|-----------------------|-----------------------|-----------------------|-----------------------|
| - valence<br>(how pleasant or unpleasant the picture is) | <input type="radio"/> |
| - arousal<br>(how intensely emotional the image evokes)  | <input type="radio"/> |
| - threat<br>(how threatening you find the image)         | <input type="radio"/> |
| - disgust<br>(how disgusting)                            | <input type="radio"/> |

**you find  
the image)**

**Rate the  
picture  
below!**

Please rate the images presented in the questionnaire on a nine-point scale along the following dimensions:

- valence (how pleasant or unpleasant the picture is)
- arousal (how intensely emotional the image evokes)
- threat (how threatening you find the image)
- disgust (how disgusting you find the image)

where:

Valence:

1=disgust/negative

5=neutral

9=pleasant/positive

Arousal:

1=calm/peaceful

5=neutral

9=excited/excited

Threat:

1=unthreatening

9=threatening

Disgust

1 = not disgusting

9 = disgusting

106. Picture 25 \*

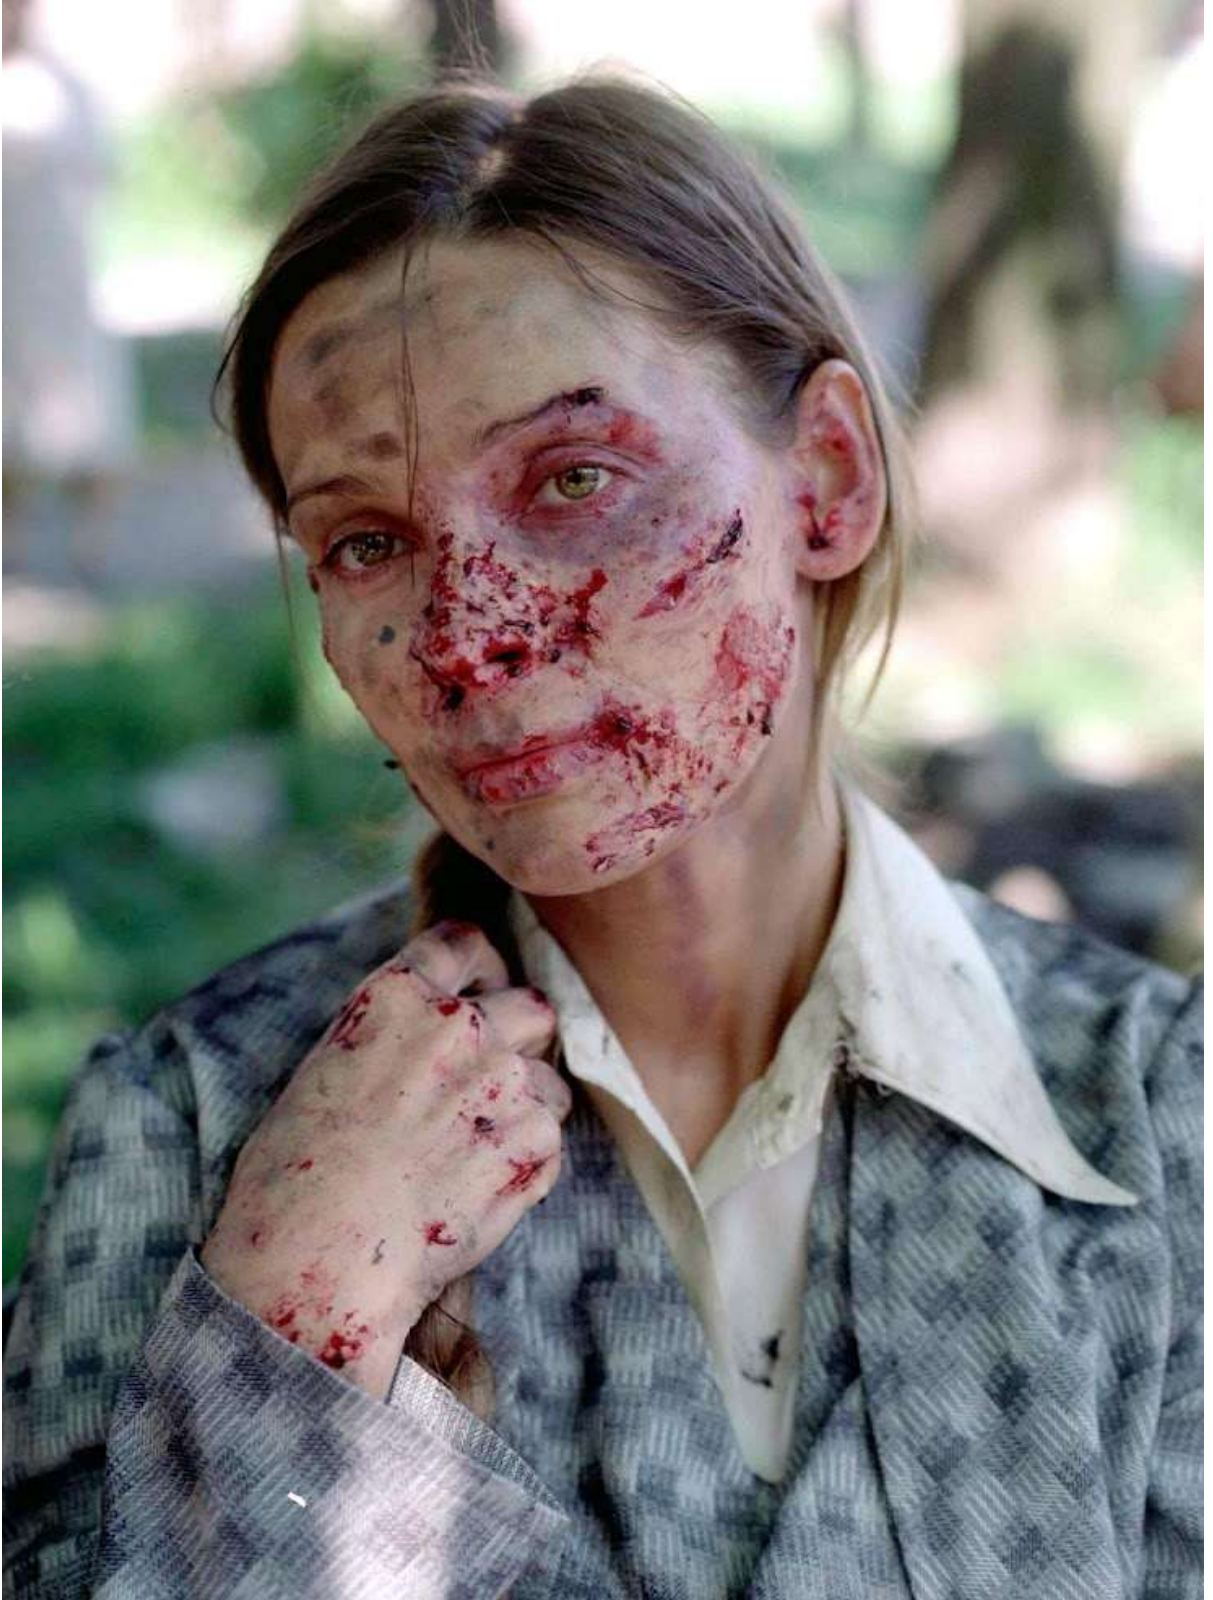

Soronként csak egy oválist jelöljön be.

1 2 3 4 5 6 7 8

- valence  
(how  
pleasant or  
unpleasant  
the picture  
is)

**- arousal  
(how  
intensely  
emotional  
the image  
evokes)**

       

**- threat  
(how  
threatening  
you find  
the image)**

       

**- disgust  
(how  
disgusting  
you find  
the image)**

       

Rate the  
picture  
below!

Please rate the images presented in the questionnaire on a nine-point scale along the following dimensions:

- valence (how pleasant or unpleasant the picture is)
  - arousal (how intensely emotional the image evokes)
  - threat (how threatening you find the image)
  - disgust (how disgusting you find the image)
- where:

Valence:

- 1=disgust/negative
- 5=neutral
- 9=pleasant/positive

Arousal:

- 1=calm/peaceful
- 5=neutral
- 9=excited/excited

Threat:

- 1=unthreatening
- 9=threatening

Disgust

- 1 = not disgusting
- 9 = disgusting

107. Picture 26 \*

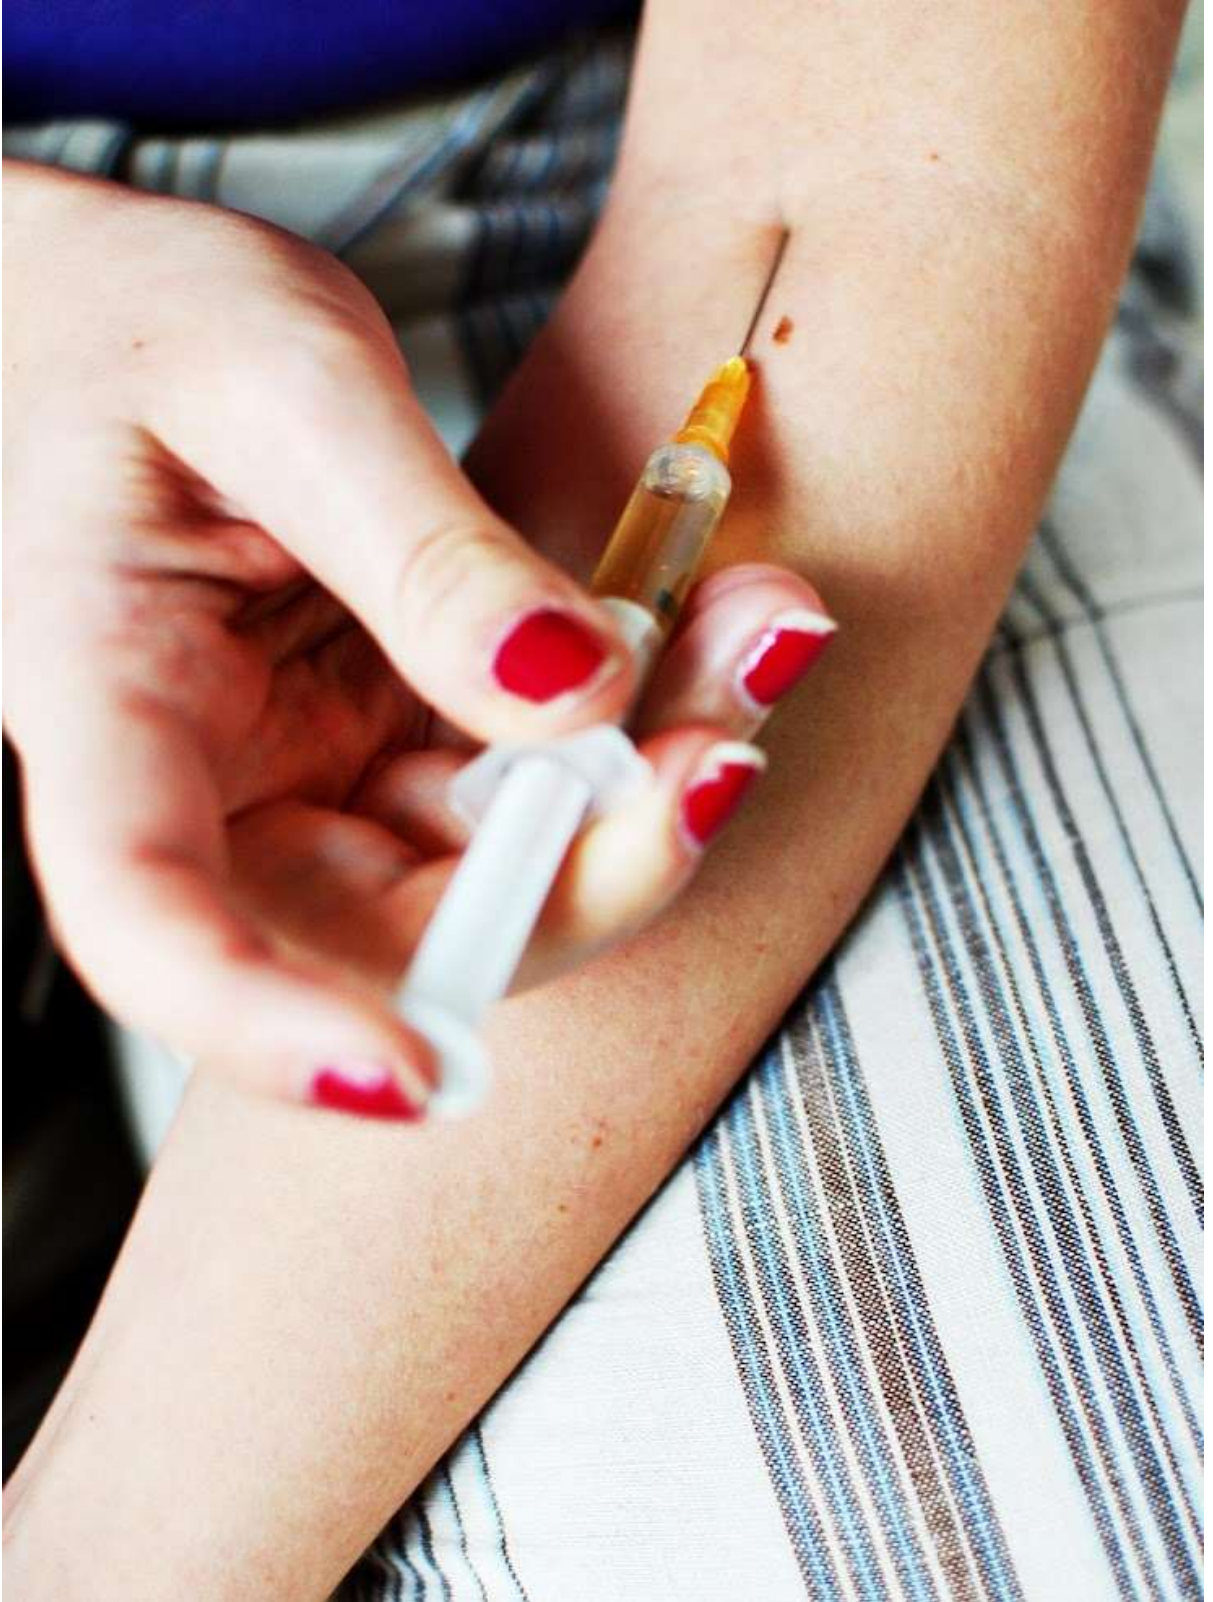

Soronként csak egy oválist jelöljön be.

1 2 3 4 5 6 7 8

- valence  
(how  
pleasant or  
unpleasant  
the picture  
is)



**- arousal  
(how  
intensely  
emotional  
the image  
evokes)**

       

**- threat  
(how  
threatening  
you find  
the image)**

       

**- disgust  
(how  
disgusting  
you find  
the image)**

       

Rate the  
picture  
below!

Please rate the images presented in the questionnaire on a nine-point scale along the following dimensions:

- valence (how pleasant or unpleasant the picture is)
  - arousal (how intensely emotional the image evokes)
  - threat (how threatening you find the image)
  - disgust (how disgusting you find the image)
- where:

Valence:

- 1=disgust/negative
- 5=neutral
- 9=pleasant/positive

Arousal:

- 1=calm/peaceful
- 5=neutral
- 9=excited/excited

Threat:

- 1=unthreatening
- 9=threatening

Disgust

- 1 = not disgusting
- 9 = disgusting

## 108. Picture 27 \*

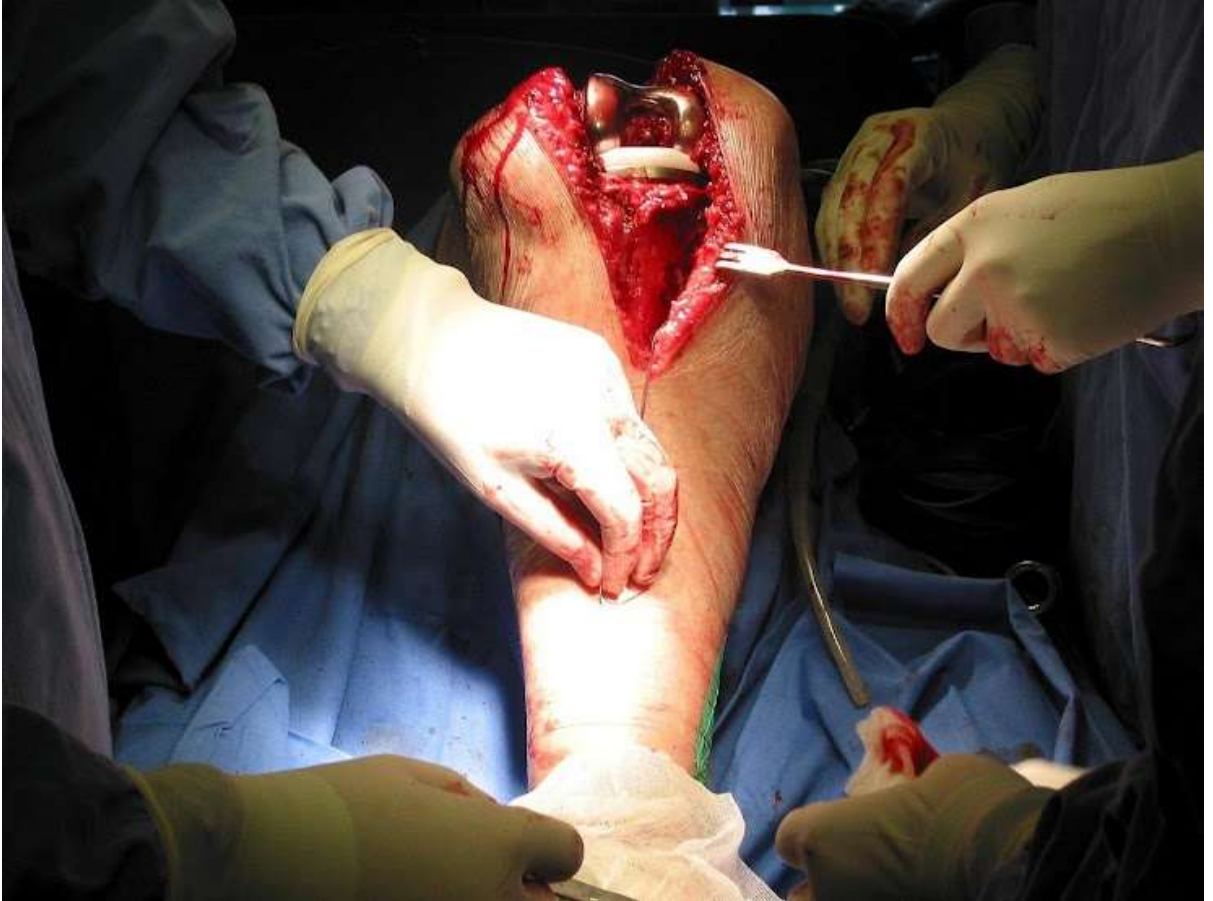

Soronként csak egy oválist jelöljön be.

|                                                          | 1                     | 2                     | 3                     | 4                     | 5                     | 6                     | 7                     | 8                     |
|----------------------------------------------------------|-----------------------|-----------------------|-----------------------|-----------------------|-----------------------|-----------------------|-----------------------|-----------------------|
| - valence<br>(how pleasant or unpleasant the picture is) | <input type="radio"/> |
| - arousal<br>(how intensely emotional the image evokes)  | <input type="radio"/> |
| - threat<br>(how threatening you find the image)         | <input type="radio"/> |
| - disgust<br>(how disgusting)                            | <input type="radio"/> |

**you find  
the image)**

**Rate the  
picture  
below!**

Please rate the images presented in the questionnaire on a nine-point scale along the following dimensions:

- valence (how pleasant or unpleasant the picture is)
- arousal (how intensely emotional the image evokes)
- threat (how threatening you find the image)
- disgust (how disgusting you find the image)

where:

Valence:

1=disgust/negative

5=neutral

9=pleasant/positive

Arousal:

1=calm/peaceful

5=neutral

9=excited/excited

Threat:

1=unthreatening

9=threatening

Disgust

1 = not disgusting

9 = disgusting

109. Picture 28 \*

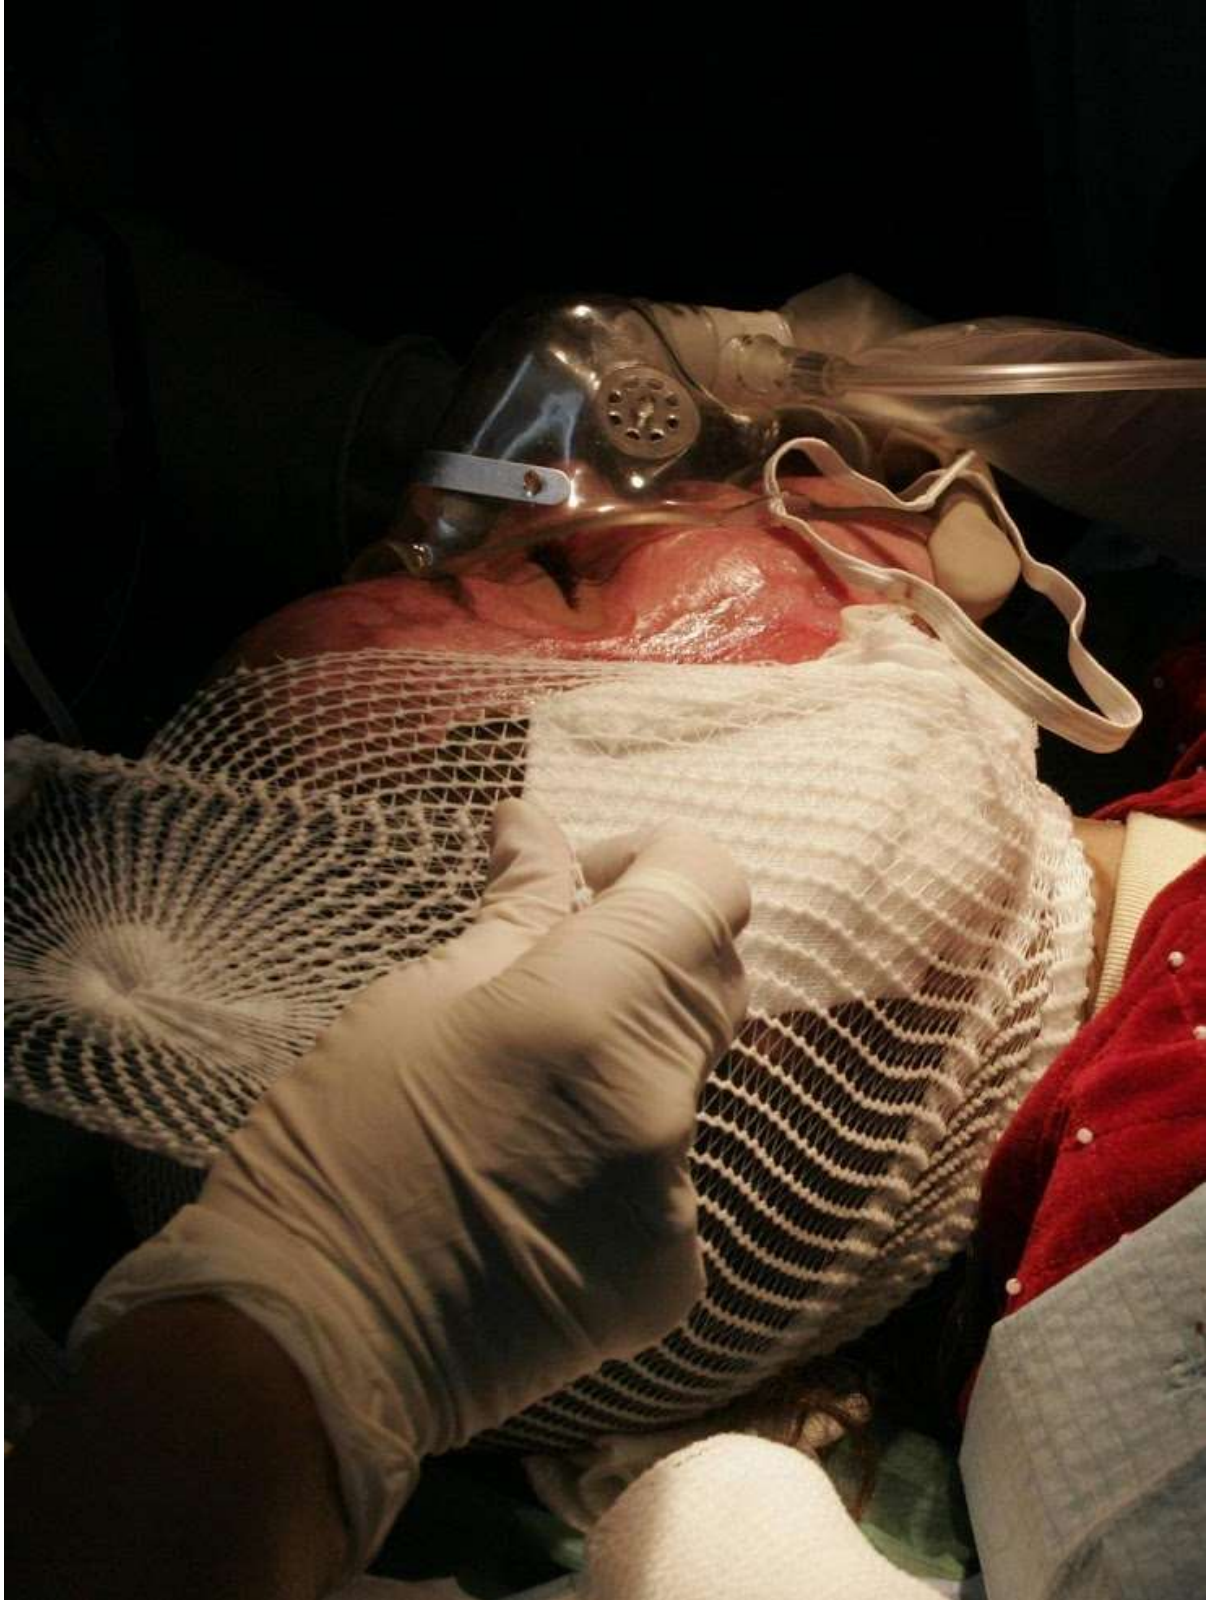

Soronként csak egy oválist jelöljön be.

1 2 3 4 5 6 7 8

- valence  
(how  
pleasant or  
unpleasant  
the picture  
is)

**- arousal  
(how  
intensely  
emotional  
the image  
evokes)**

       

**- threat  
(how  
threatening  
you find  
the image)**

       

**- disgust  
(how  
disgusting  
you find  
the image)**

       

Rate the  
picture  
below!

Please rate the images presented in the questionnaire on a nine-point scale along the following dimensions:

- valence (how pleasant or unpleasant the picture is)
  - arousal (how intensely emotional the image evokes)
  - threat (how threatening you find the image)
  - disgust (how disgusting you find the image)
- where:

Valence:

- 1=disgust/negative
- 5=neutral
- 9=pleasant/positive

Arousal:

- 1=calm/peaceful
- 5=neutral
- 9=excited/excited

Threat:

- 1=unthreatening
- 9=threatening

Disgust

- 1 = not disgusting
- 9 = disgusting

## 110. Picture 29 \*

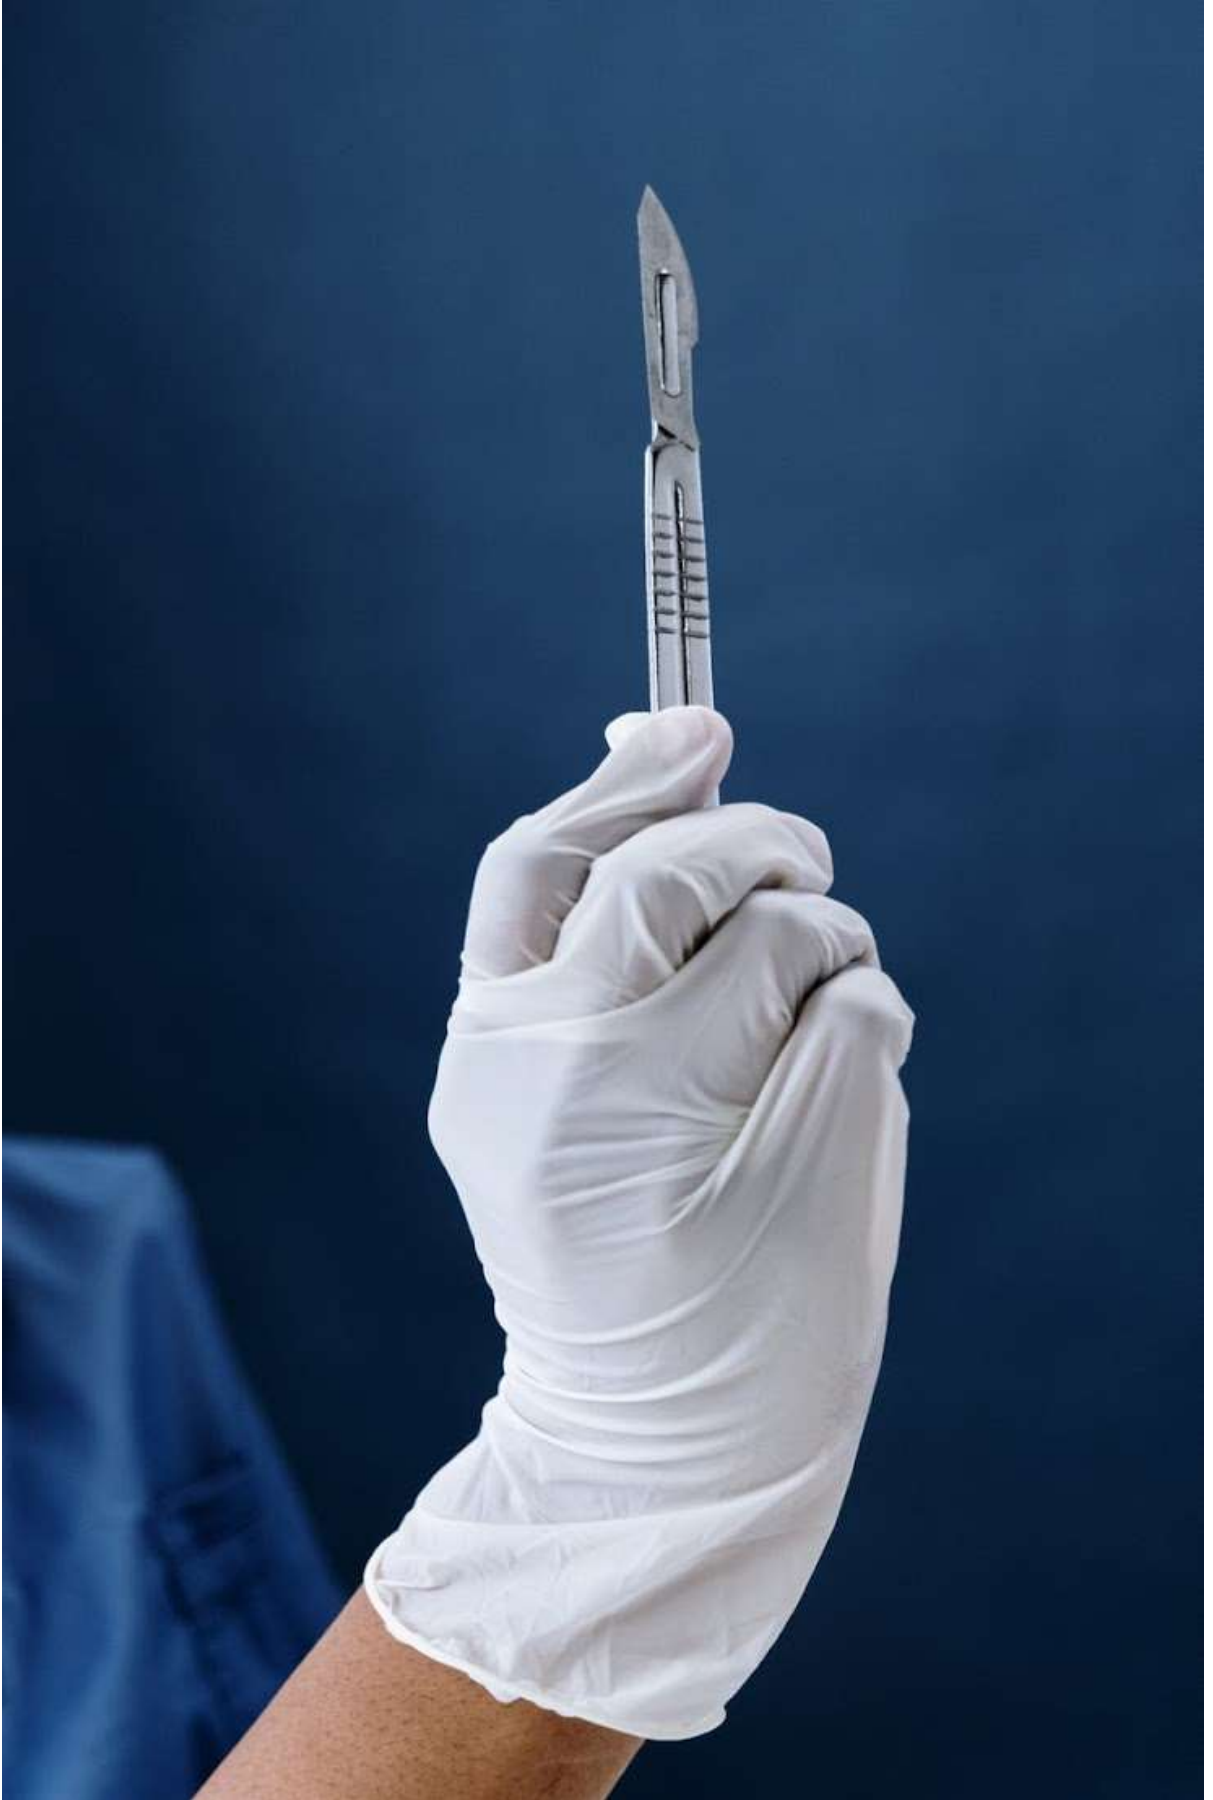

Soronként csak egy oválist jelöljön be.

|                  | 1                     | 2                     | 3                     | 4                     | 5                     | 6                     | 7                     | 8                     |
|------------------|-----------------------|-----------------------|-----------------------|-----------------------|-----------------------|-----------------------|-----------------------|-----------------------|
| <b>- valence</b> | <input type="radio"/> |

**(how pleasant or unpleasant the picture is)**

**- arousal (how intensely emotional the image evokes)**

**- threat (how threatening you find the image)**

**- disgust (how disgusting you find the image)**

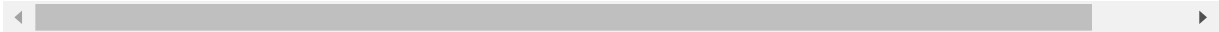

**Rate the picture below!**

Please rate the images presented in the questionnaire on a nine-point scale along the following dimensions:

- valence (how pleasant or unpleasant the picture is)
- arousal (how intensely emotional the image evokes)
- threat (how threatening you find the image)
- disgust (how disgusting you find the image)

where:

Valence:

- 1=disgust/negative
- 5=neutral
- 9=pleasant/positive

Arousal:

- 1=calm/peaceful
- 5=neutral
- 9=excited/excited

Threat:

- 1=unthreatening
- 9=threatening

Disgust

- 1 = not disgusting
- 9 = disgusting

111. Picture 30 \*

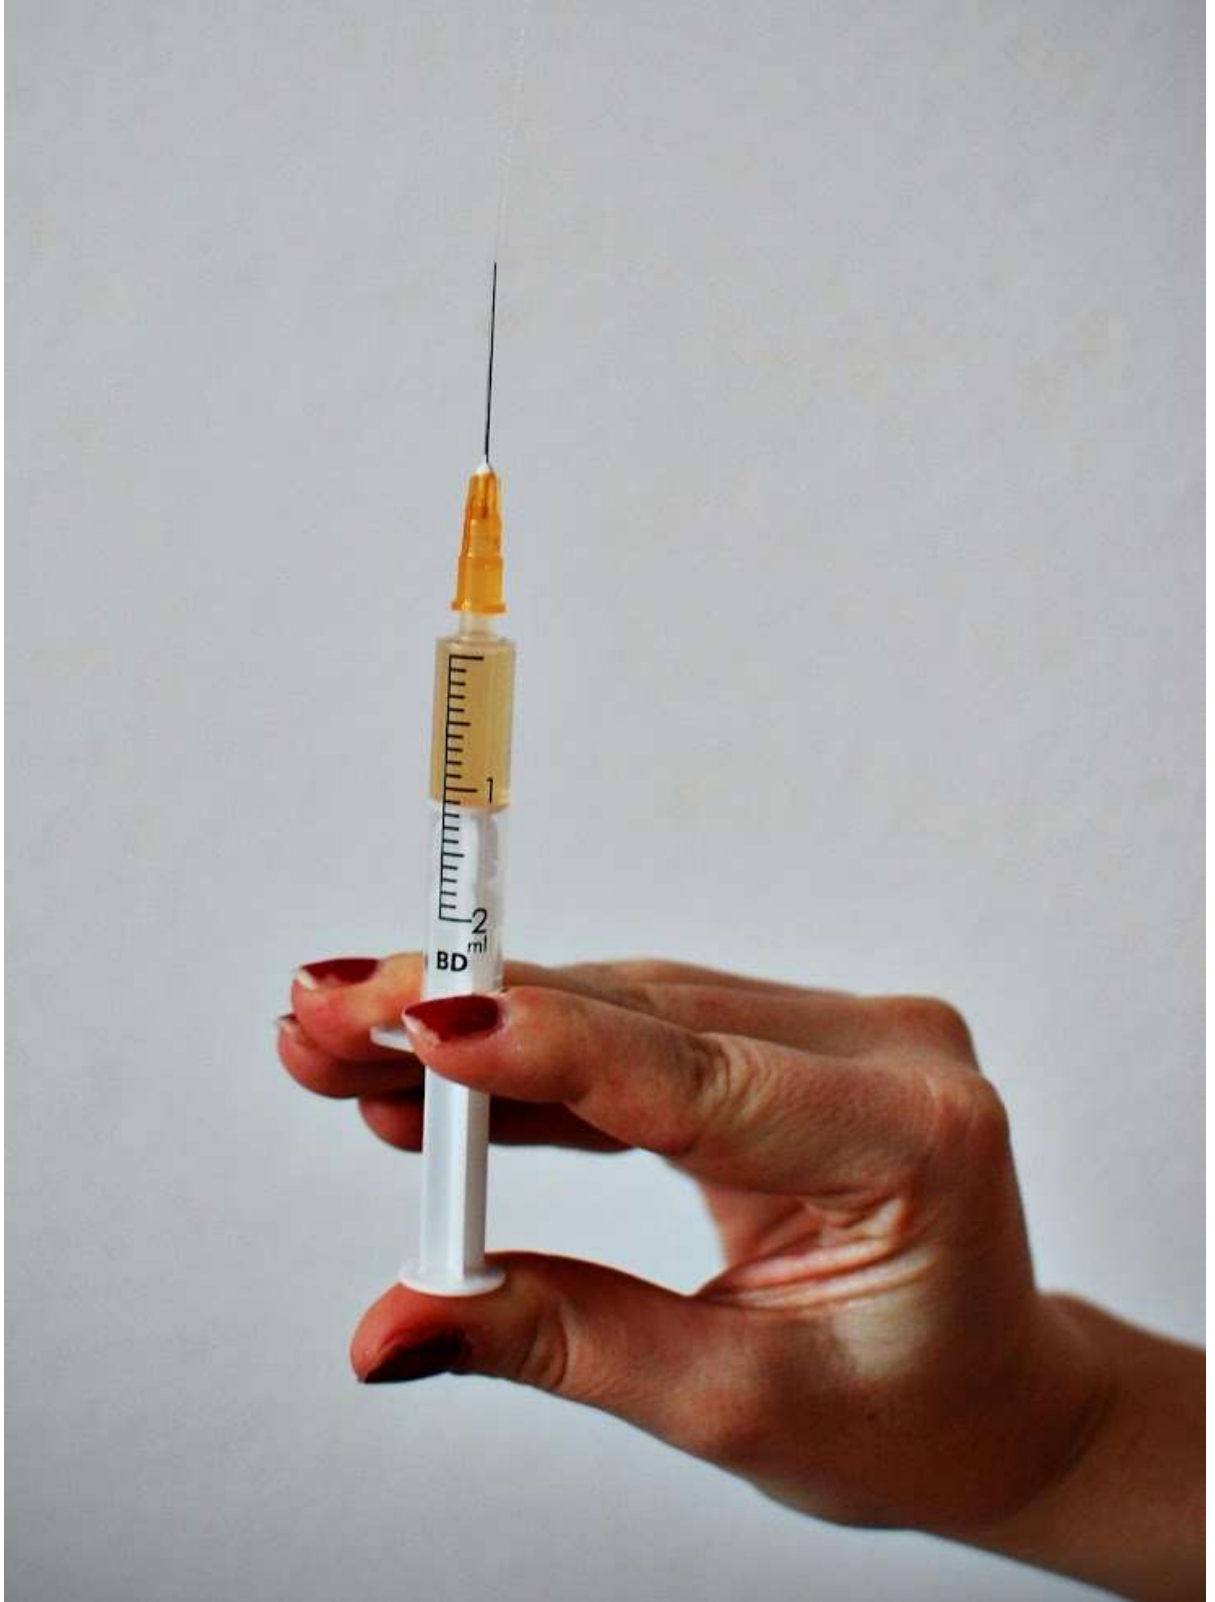

Soronként csak egy oválist jelöljön be.

1 2 3 4 5 6 7 8

- valence  
(how  
pleasant or  
unpleasant  
the picture  
is)



**- arousal  
(how  
intensely  
emotional  
the image  
evokes)**

       

**- threat  
(how  
threatening  
you find  
the image)**

       

**- disgust  
(how  
disgusting  
you find  
the image)**

       
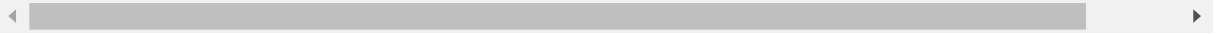

Rate the  
picture  
below!

Please rate the images presented in the questionnaire on a nine-point scale along the following dimensions:

- valence (how pleasant or unpleasant the picture is)
  - arousal (how intensely emotional the image evokes)
  - threat (how threatening you find the image)
  - disgust (how disgusting you find the image)
- where:

Valence:

- 1=disgust/negative
- 5=neutral
- 9=pleasant/positive

Arousal:

- 1=calm/peaceful
- 5=neutral
- 9=excited/excited

Threat:

- 1=unthreatening
- 9=threatening

Disgust

- 1 = not disgusting
- 9 = disgusting

## 112. Picture 31 \*

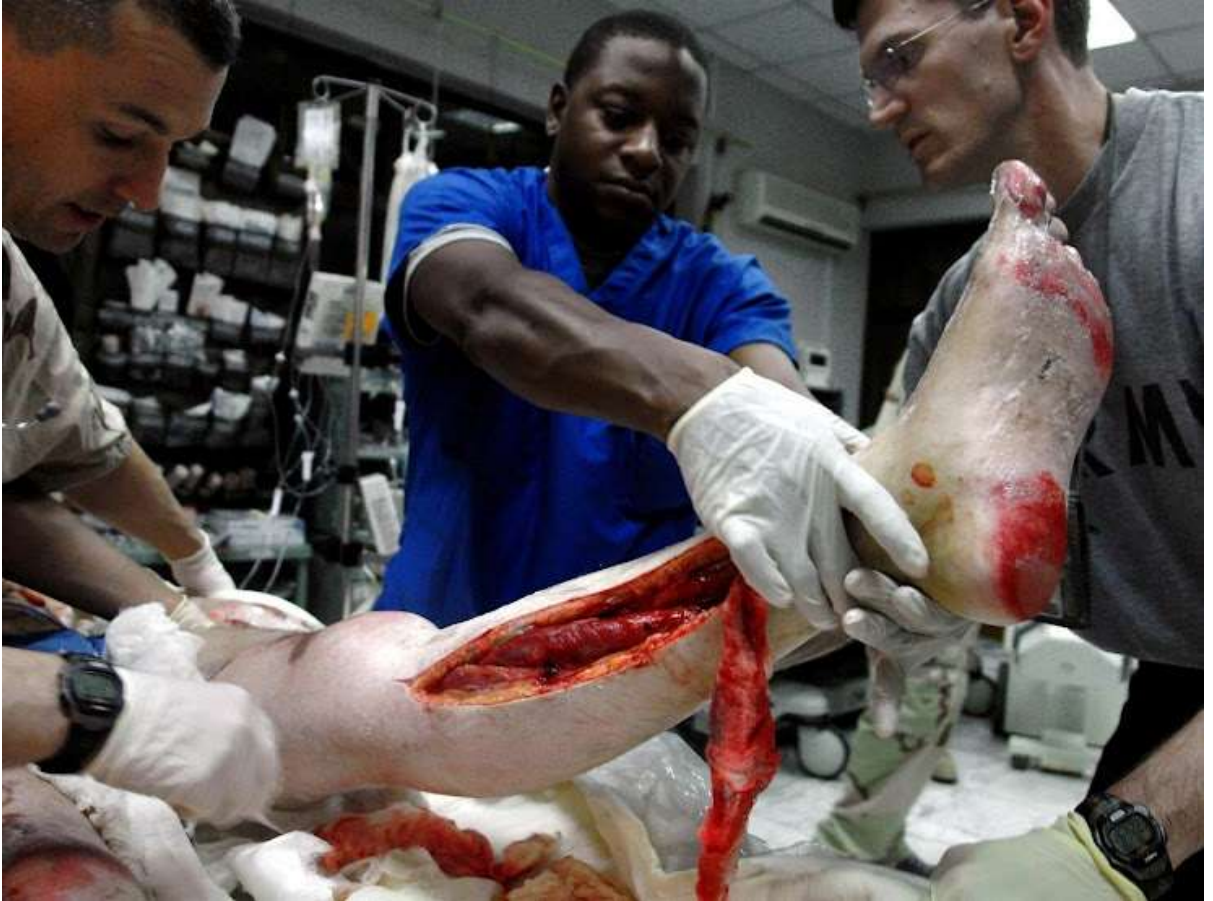

Soronként csak egy oválist jelöljön be.

|                                                          | 1                     | 2                     | 3                     | 4                     | 5                     | 6                     | 7                     | 8                     |
|----------------------------------------------------------|-----------------------|-----------------------|-----------------------|-----------------------|-----------------------|-----------------------|-----------------------|-----------------------|
| - valence<br>(how pleasant or unpleasant the picture is) | <input type="radio"/> |
| - arousal<br>(how intensely emotional the image evokes)  | <input type="radio"/> |
| - threat<br>(how threatening you find the image)         | <input type="radio"/> |
| - disgust<br>(how disgusting)                            | <input type="radio"/> |

**you find  
the image)**

**Rate the  
picture  
below!**

Please rate the images presented in the questionnaire on a nine-point scale along the following dimensions:

- valence (how pleasant or unpleasant the picture is)
- arousal (how intensely emotional the image evokes)
- threat (how threatening you find the image)
- disgust (how disgusting you find the image)

where:

Valence:

1=disgust/negative

5=neutral

9=pleasant/positive

Arousal:

1=calm/peaceful

5=neutral

9=excited/excited

Threat:

1=unthreatening

9=threatening

Disgust

1 = not disgusting

9 = disgusting

## 113. Picture 32 \*

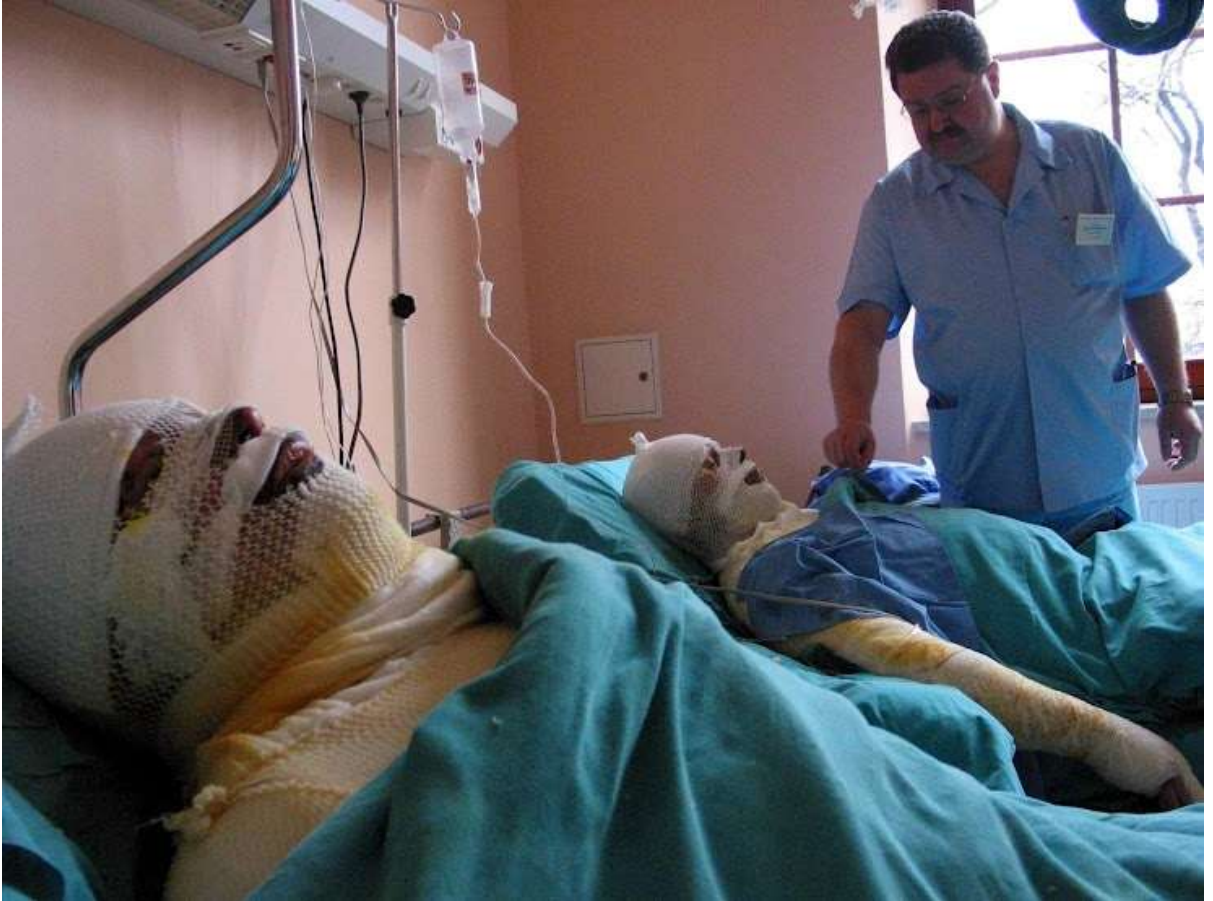

Soronként csak egy oválist jelöljön be.

|                                                          | 1                     | 2                     | 3                     | 4                     | 5                     | 6                     | 7                     | 8                     |
|----------------------------------------------------------|-----------------------|-----------------------|-----------------------|-----------------------|-----------------------|-----------------------|-----------------------|-----------------------|
| - valence<br>(how pleasant or unpleasant the picture is) | <input type="radio"/> |
| - arousal<br>(how intensely emotional the image evokes)  | <input type="radio"/> |
| - threat<br>(how threatening you find the image)         | <input type="radio"/> |
| - disgust<br>(how disgusting)                            | <input type="radio"/> |

**you find  
the image)**

**Rate the  
picture  
below!**

Please rate the images presented in the questionnaire on a nine-point scale along the following dimensions:

- valence (how pleasant or unpleasant the picture is)
- arousal (how intensely emotional the image evokes)
- threat (how threatening you find the image)
- disgust (how disgusting you find the image)

where:

Valence:

1=disgust/negative

5=neutral

9=pleasant/positive

Arousal:

1=calm/peaceful

5=neutral

9=excited/excited

Threat:

1=unthreatening

9=threatening

Disgust

1 = not disgusting

9 = disgusting

## 114. Picture 33 \*

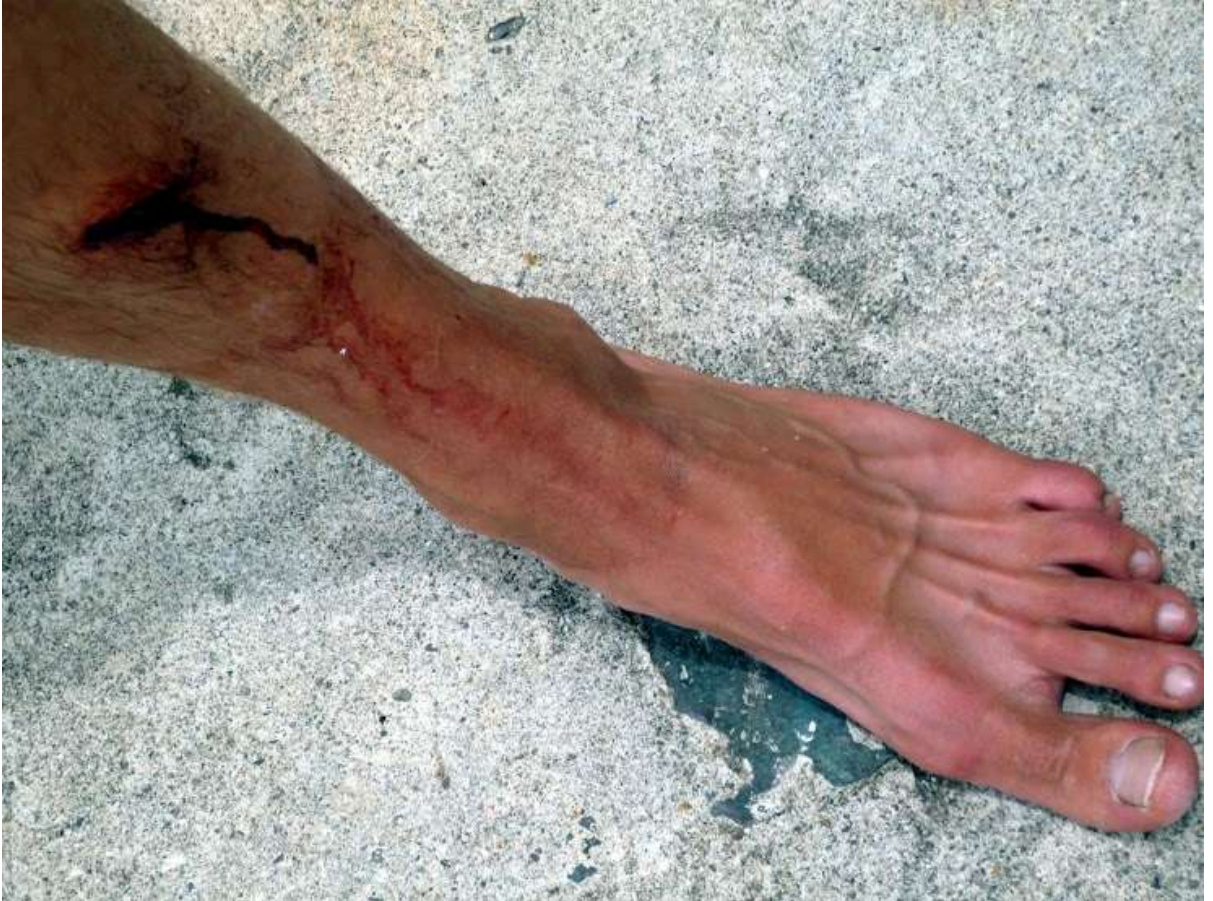

Soronként csak egy oválist jelöljön be.

|                                                          | 1                     | 2                     | 3                     | 4                     | 5                     | 6                     | 7                     | 8                     |
|----------------------------------------------------------|-----------------------|-----------------------|-----------------------|-----------------------|-----------------------|-----------------------|-----------------------|-----------------------|
| - valence<br>(how pleasant or unpleasant the picture is) | <input type="radio"/> |
| - arousal<br>(how intensely emotional the image evokes)  | <input type="radio"/> |
| - threat<br>(how threatening you find the image)         | <input type="radio"/> |
| - disgust<br>(how disgusting)                            | <input type="radio"/> |

**you find  
the image)**

**Rate the  
picture  
below!**

Please rate the images presented in the questionnaire on a nine-point scale along the following dimensions:

- valence (how pleasant or unpleasant the picture is)
- arousal (how intensely emotional the image evokes)
- threat (how threatening you find the image)
- disgust (how disgusting you find the image)

where:

Valence:

1=disgust/negative

5=neutral

9=pleasant/positive

Arousal:

1=calm/peaceful

5=neutral

9=excited/excited

Threat:

1=unthreatening

9=threatening

Disgust

1 = not disgusting

9 = disgusting

115. Picture 34 \*

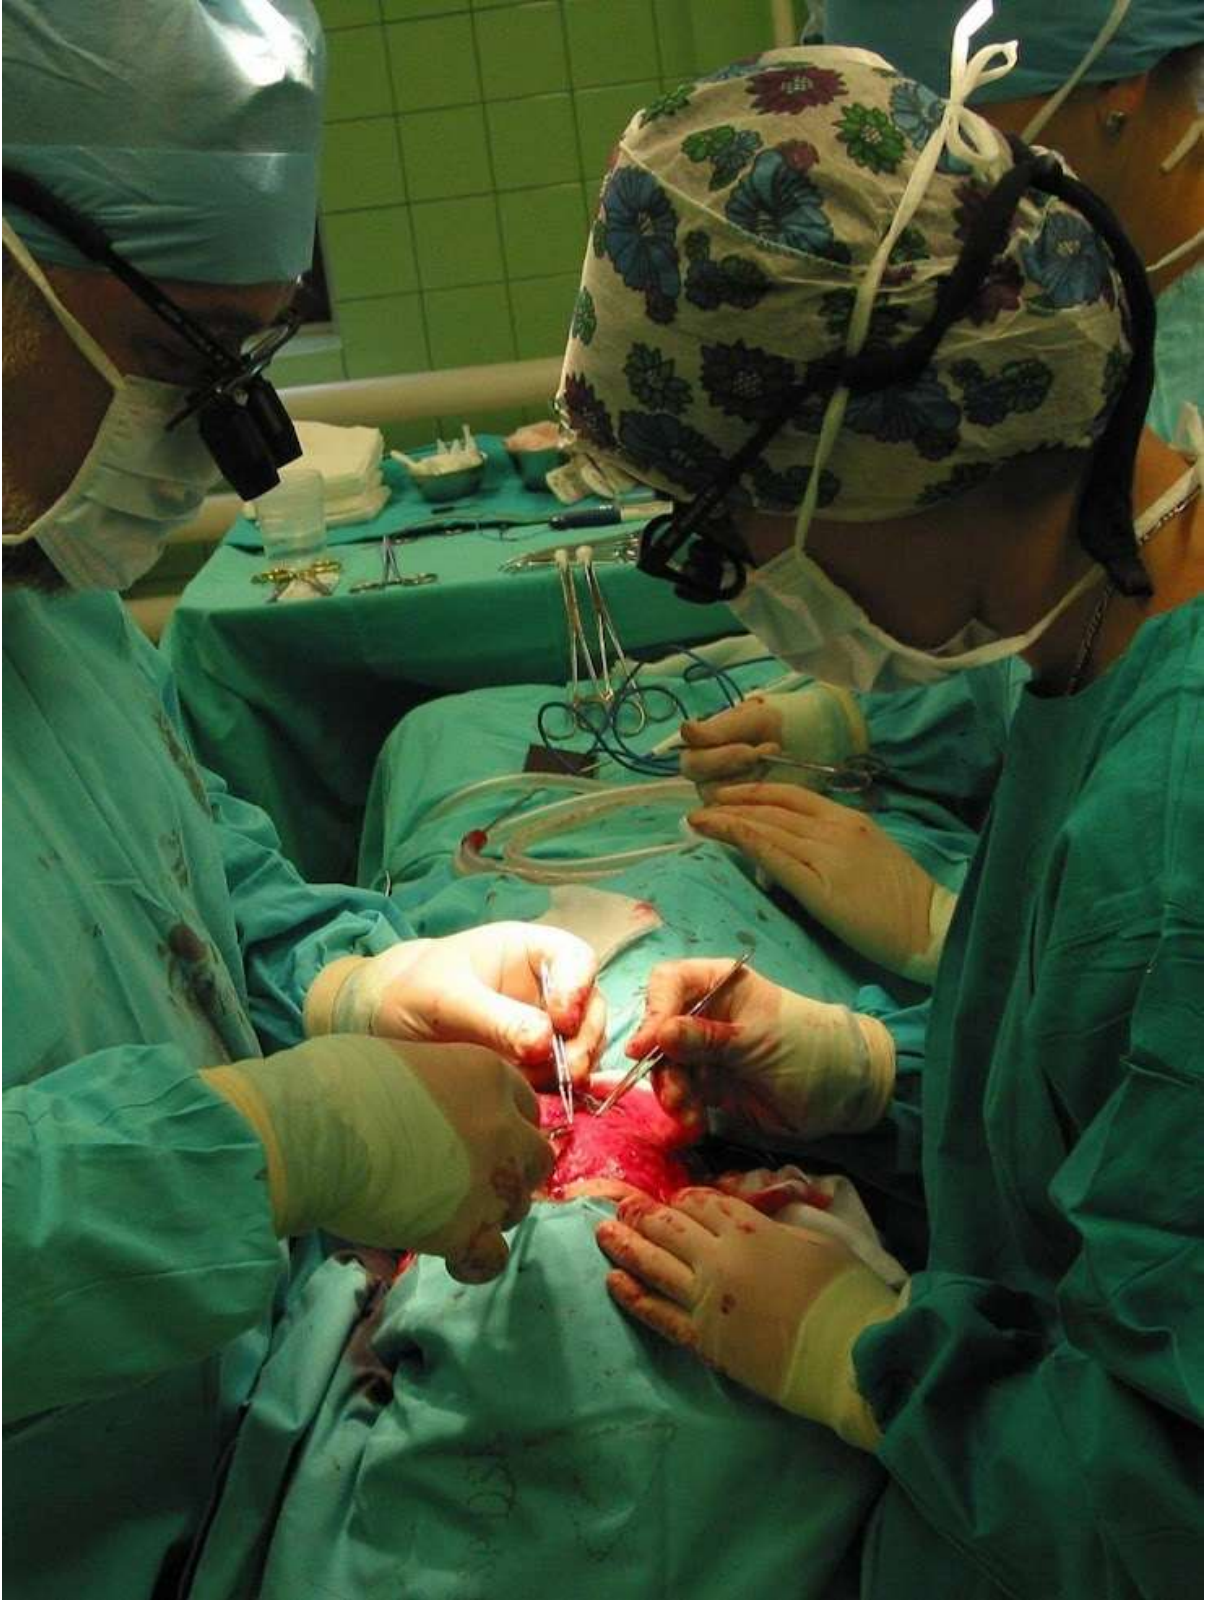

Soronként csak egy oválist jelöljön be.

1 2 3 4 5 6 7 8

- valence  
(how  
pleasant or  
unpleasant  
the picture  
is)



**- arousal  
(how  
intensely  
emotional  
the image  
evokes)**

       

**- threat  
(how  
threatening  
you find  
the image)**

       

**- disgust  
(how  
disgusting  
you find  
the image)**

       

Rate the  
picture  
below!

Please rate the images presented in the questionnaire on a nine-point scale along the following dimensions:

- valence (how pleasant or unpleasant the picture is)
  - arousal (how intensely emotional the image evokes)
  - threat (how threatening you find the image)
  - disgust (how disgusting you find the image)
- where:

Valence:

- 1=disgust/negative
- 5=neutral
- 9=pleasant/positive

Arousal:

- 1=calm/peaceful
- 5=neutral
- 9=excited/excited

Threat:

- 1=unthreatening
- 9=threatening

Disgust

- 1 = not disgusting
- 9 = disgusting

## 116. Picture 35 \*

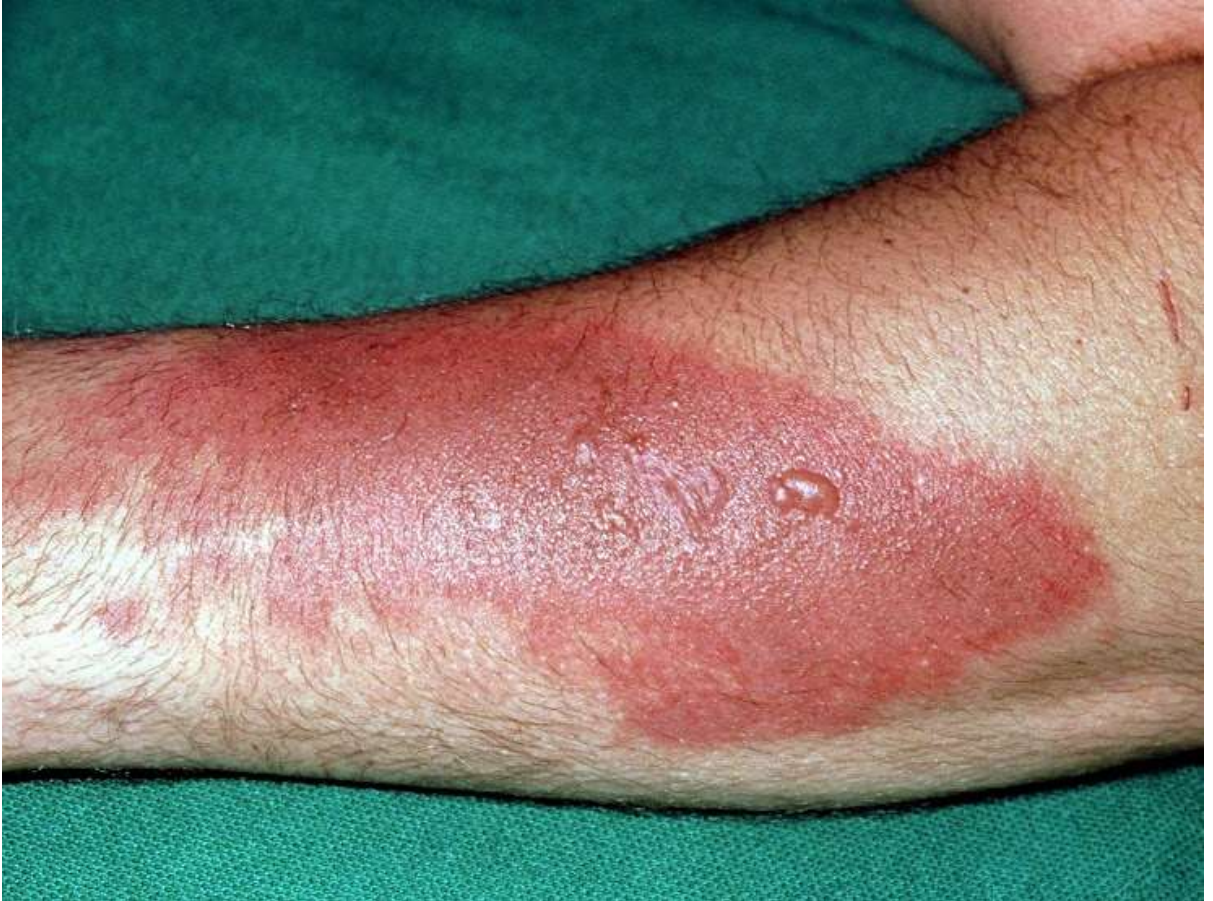

Soronként csak egy oválist jelöljön be.

|                                                          | 1                     | 2                     | 3                     | 4                     | 5                     | 6                     | 7                     | 8                     |
|----------------------------------------------------------|-----------------------|-----------------------|-----------------------|-----------------------|-----------------------|-----------------------|-----------------------|-----------------------|
| - valence<br>(how pleasant or unpleasant the picture is) | <input type="radio"/> |
| - arousal<br>(how intensely emotional the image evokes)  | <input type="radio"/> |
| - threat<br>(how threatening you find the image)         | <input type="radio"/> |
| - disgust<br>(how disgusting)                            | <input type="radio"/> |

**you find  
the image)**

**Rate the  
picture  
below!**

Please rate the images presented in the questionnaire on a nine-point scale along the following dimensions:

- valence (how pleasant or unpleasant the picture is)
- arousal (how intensely emotional the image evokes)
- threat (how threatening you find the image)
- disgust (how disgusting you find the image)

where:

Valence:

1=disgust/negative

5=neutral

9=pleasant/positive

Arousal:

1=calm/peaceful

5=neutral

9=excited/excited

Threat:

1=unthreatening

9=threatening

Disgust

1 = not disgusting

9 = disgusting

## 117. Picture 36 \*

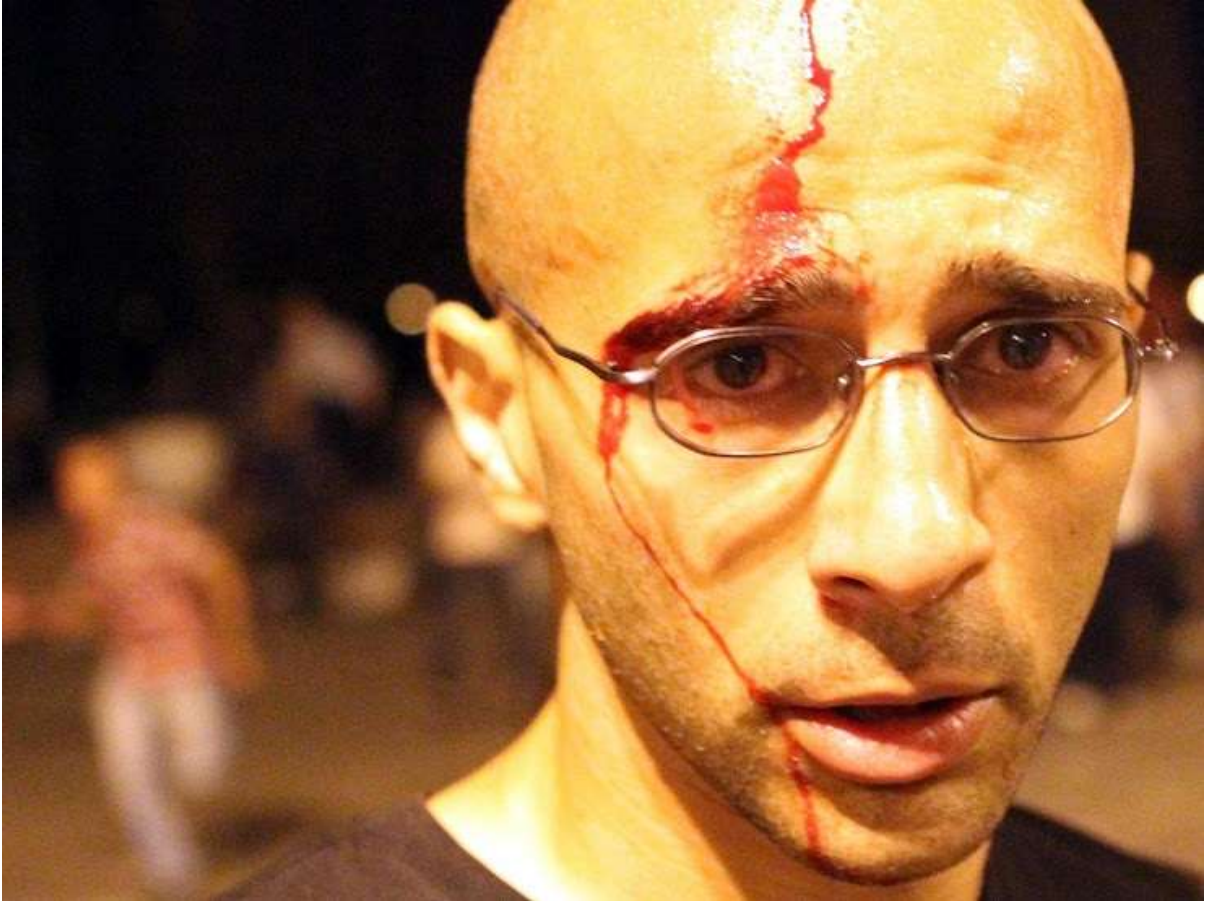

Soronként csak egy oválist jelöljön be.

|                                                          | 1                     | 2                     | 3                     | 4                     | 5                     | 6                     | 7                     | 8                     |
|----------------------------------------------------------|-----------------------|-----------------------|-----------------------|-----------------------|-----------------------|-----------------------|-----------------------|-----------------------|
| - valence<br>(how pleasant or unpleasant the picture is) | <input type="radio"/> |
| - arousal<br>(how intensely emotional the image evokes)  | <input type="radio"/> |
| - threat<br>(how threatening you find the image)         | <input type="radio"/> |
| - disgust<br>(how disgusting)                            | <input type="radio"/> |

**you find  
the image)**

**Rate the  
picture  
below!**

Please rate the images presented in the questionnaire on a nine-point scale along the following dimensions:

- valence (how pleasant or unpleasant the picture is)
- arousal (how intensely emotional the image evokes)
- threat (how threatening you find the image)
- disgust (how disgusting you find the image)

where:

Valence:

1=disgust/negative

5=neutral

9=pleasant/positive

Arousal:

1=calm/peaceful

5=neutral

9=excited/excited

Threat:

1=unthreatening

9=threatening

Disgust

1 = not disgusting

9 = disgusting

## 118. Picture 37 \*

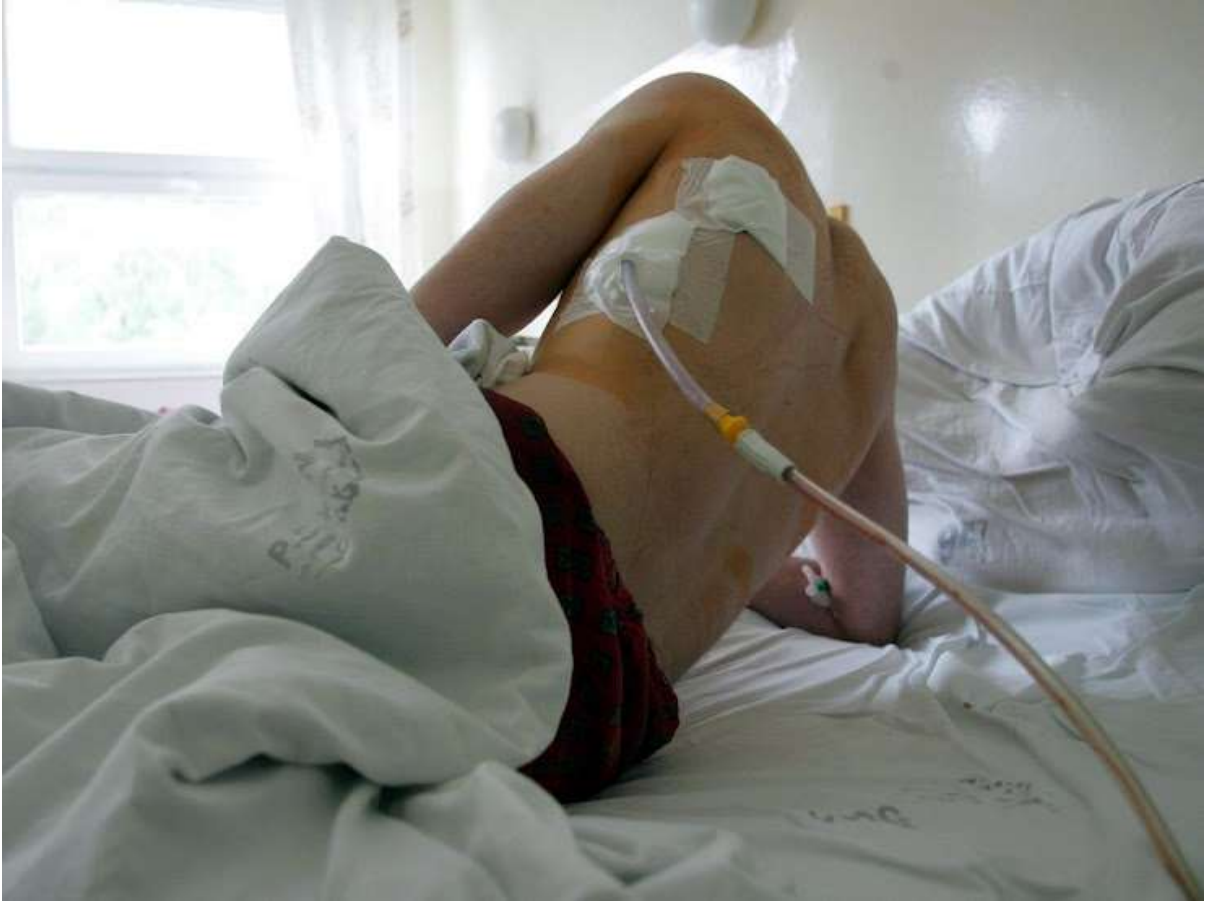

Soronként csak egy oválist jelöljön be.

|                                                          | 1                     | 2                     | 3                     | 4                     | 5                     | 6                     | 7                     | 8                     |
|----------------------------------------------------------|-----------------------|-----------------------|-----------------------|-----------------------|-----------------------|-----------------------|-----------------------|-----------------------|
| - valence<br>(how pleasant or unpleasant the picture is) | <input type="radio"/> |
| - arousal<br>(how intensely emotional the image evokes)  | <input type="radio"/> |
| - threat<br>(how threatening you find the image)         | <input type="radio"/> |
| - disgust<br>(how disgusting)                            | <input type="radio"/> |

**you find  
the image)**

**Rate the  
picture  
below!**

Please rate the images presented in the questionnaire on a nine-point scale along the following dimensions:

- valence (how pleasant or unpleasant the picture is)
- arousal (how intensely emotional the image evokes)
- threat (how threatening you find the image)
- disgust (how disgusting you find the image)

where:

Valence:

1=disgust/negative

5=neutral

9=pleasant/positive

Arousal:

1=calm/peaceful

5=neutral

9=excited/excited

Threat:

1=unthreatening

9=threatening

Disgust

1 = not disgusting

9 = disgusting

119. Picture 38 \*

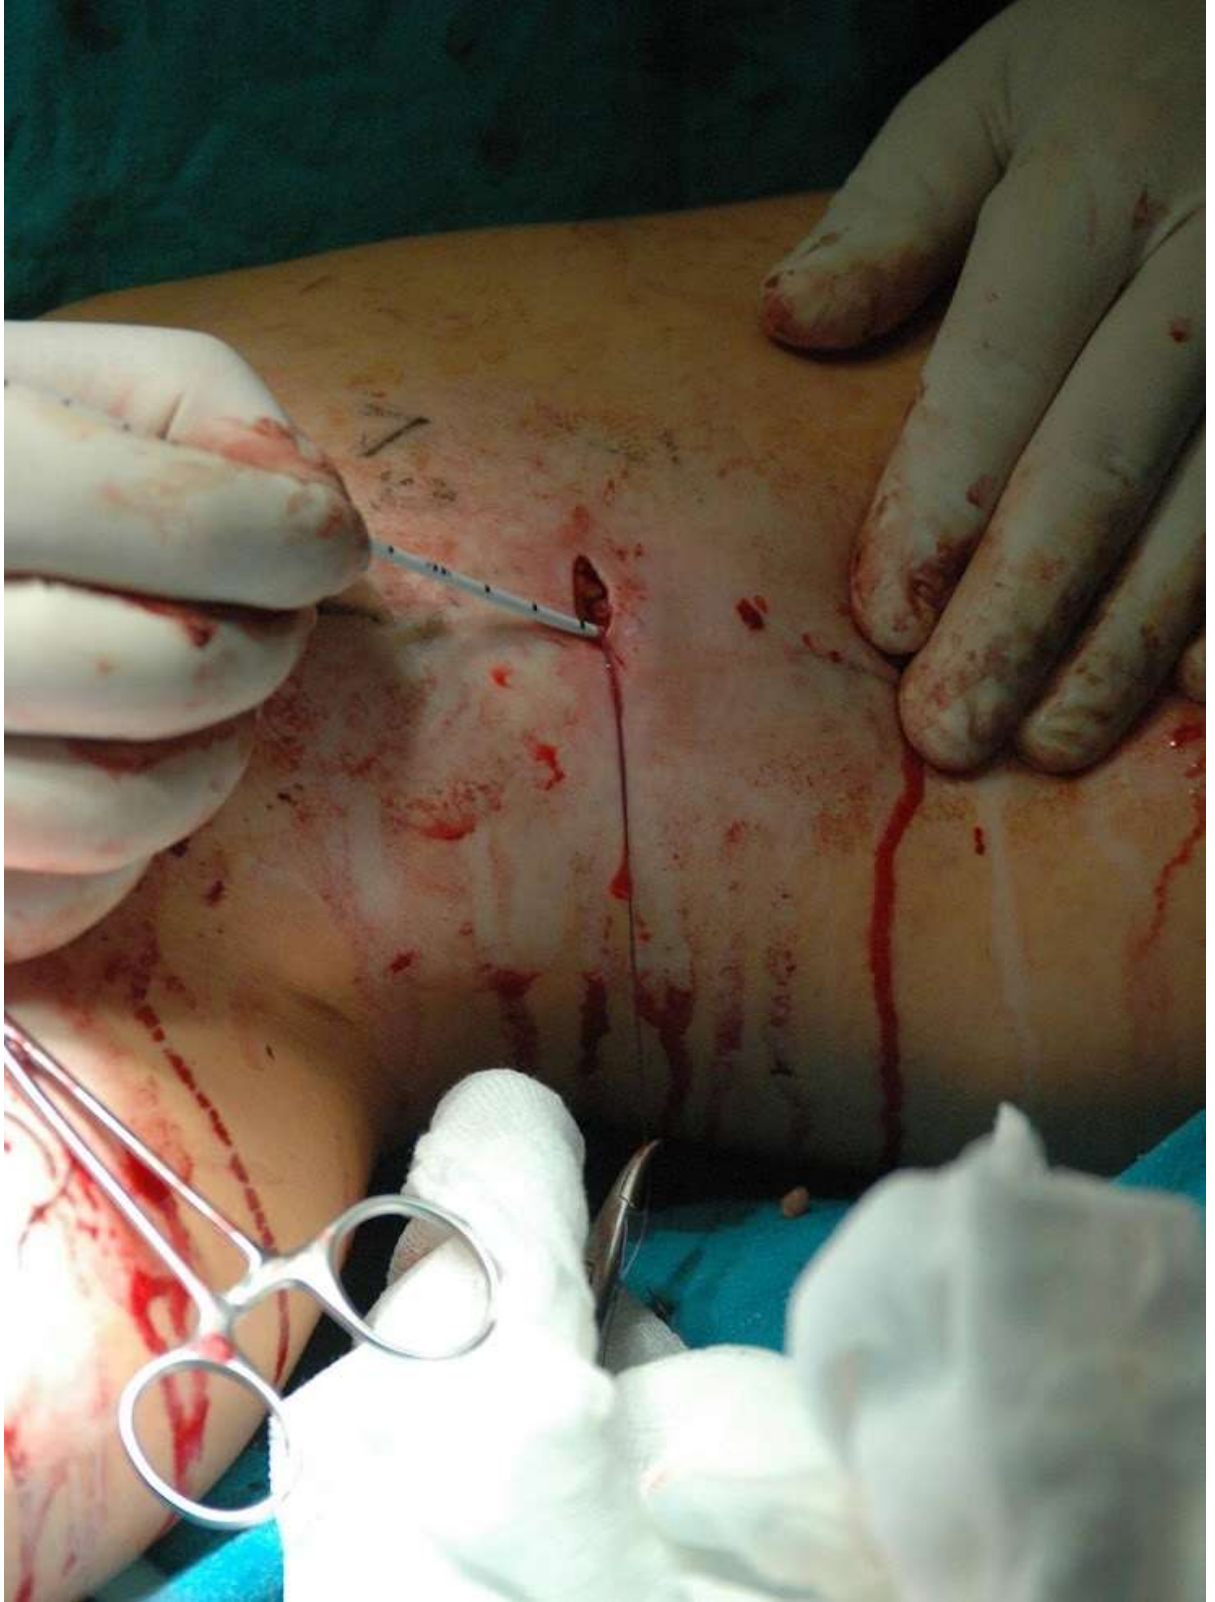

Soronként csak egy oválist jelöljön be.

1 2 3 4 5 6 7 8

- valence  
(how  
pleasant or  
unpleasant  
the picture  
is)



**- arousal  
(how  
intensely  
emotional  
the image  
evokes)**

       

**- threat  
(how  
threatening  
you find  
the image)**

       

**- disgust  
(how  
disgusting  
you find  
the image)**

       

Rate the  
picture  
below!

Please rate the images presented in the questionnaire on a nine-point scale along the following dimensions:

- valence (how pleasant or unpleasant the picture is)
  - arousal (how intensely emotional the image evokes)
  - threat (how threatening you find the image)
  - disgust (how disgusting you find the image)
- where:

Valence:

- 1=disgust/negative
- 5=neutral
- 9=pleasant/positive

Arousal:

- 1=calm/peaceful
- 5=neutral
- 9=excited/excited

Threat:

- 1=unthreatening
- 9=threatening

Disgust

- 1 = not disgusting
- 9 = disgusting

## 120. Picture 39 \*

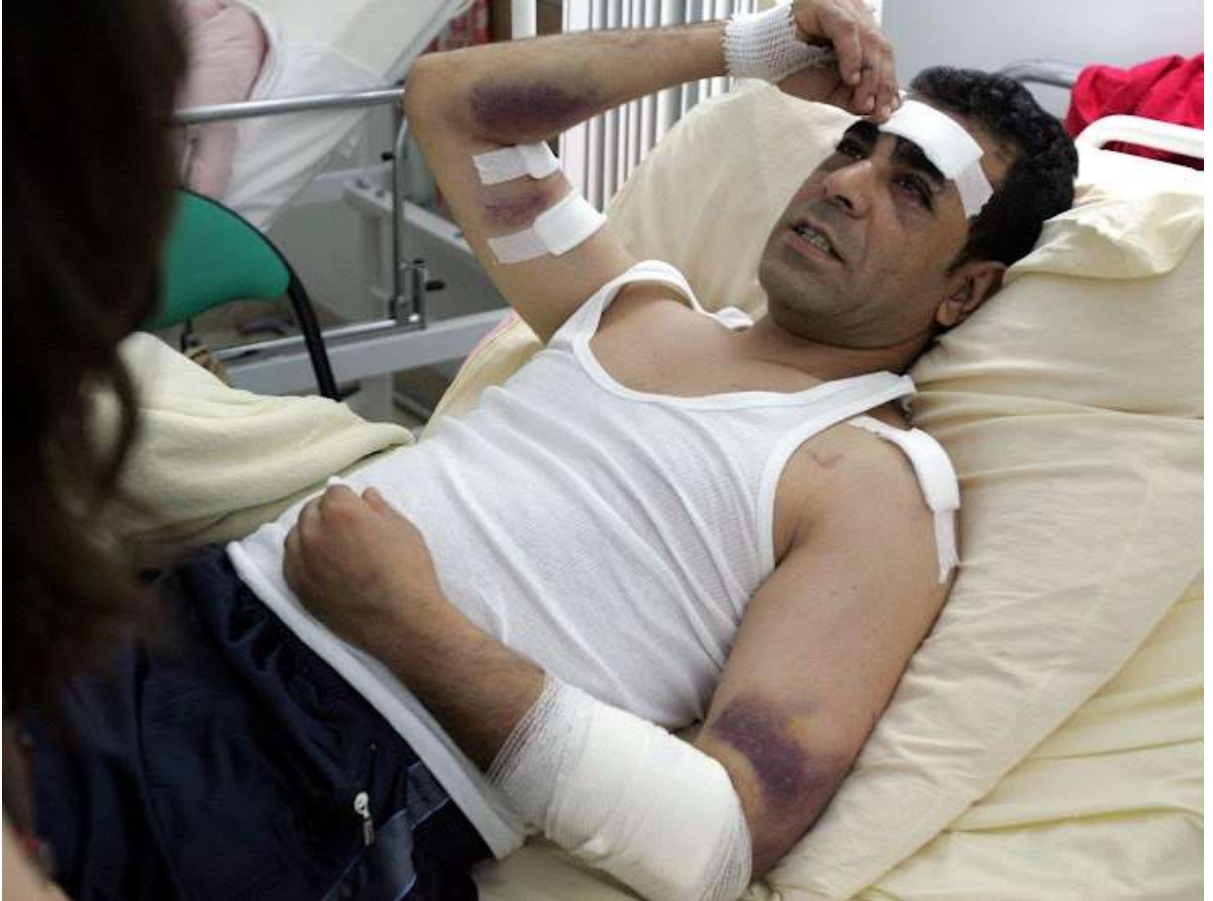

Soronként csak egy oválist jelöljön be.

|                                                          | 1                     | 2                     | 3                     | 4                     | 5                     | 6                     | 7                     | 8                     |
|----------------------------------------------------------|-----------------------|-----------------------|-----------------------|-----------------------|-----------------------|-----------------------|-----------------------|-----------------------|
| - valence<br>(how pleasant or unpleasant the picture is) | <input type="radio"/> |
| - arousal<br>(how intensely emotional the image evokes)  | <input type="radio"/> |
| - threat<br>(how threatening you find the image)         | <input type="radio"/> |
| - disgust<br>(how disgusting)                            | <input type="radio"/> |

**you find  
the image)**

**Rate the  
picture  
below!**

Please rate the images presented in the questionnaire on a nine-point scale along the following dimensions:

- valence (how pleasant or unpleasant the picture is)
- arousal (how intensely emotional the image evokes)
- threat (how threatening you find the image)
- disgust (how disgusting you find the image)

where:

Valence:

1=disgust/negative

5=neutral

9=pleasant/positive

Arousal:

1=calm/peaceful

5=neutral

9=excited/excited

Threat:

1=unthreatening

9=threatening

Disgust

1 = not disgusting

9 = disgusting

## 121. Picture 40 \*

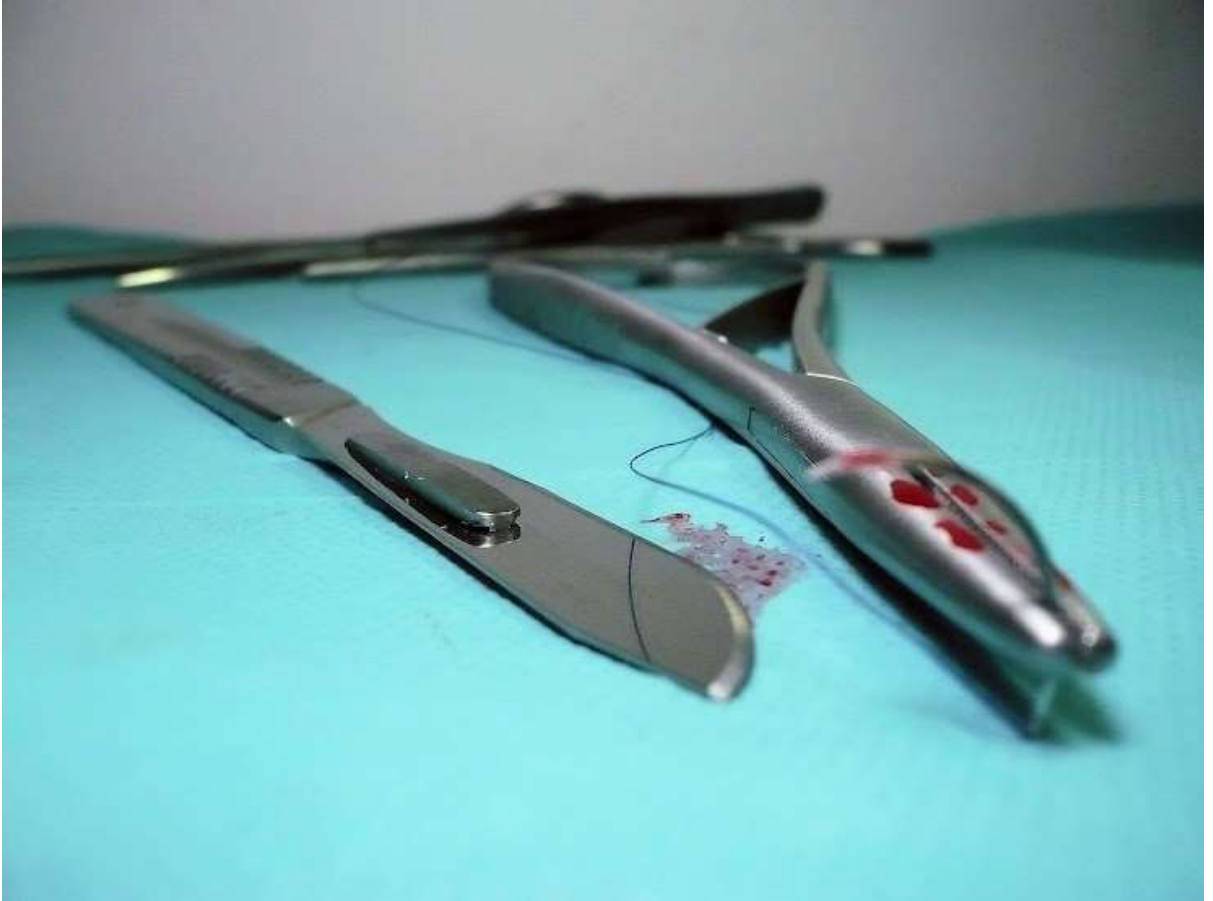

Soronként csak egy oválist jelöljön be.

|                                                          | 1                     | 2                     | 3                     | 4                     | 5                     | 6                     | 7                     | 8                     |
|----------------------------------------------------------|-----------------------|-----------------------|-----------------------|-----------------------|-----------------------|-----------------------|-----------------------|-----------------------|
| - valence<br>(how pleasant or unpleasant the picture is) | <input type="radio"/> |
| - arousal<br>(how intensely emotional the image evokes)  | <input type="radio"/> |
| - threat<br>(how threatening you find the image)         | <input type="radio"/> |
| - disgust<br>(how disgusting)                            | <input type="radio"/> |

**you find  
the image)**

**Rate the  
picture  
below!**

Please rate the images presented in the questionnaire on a nine-point scale along the following dimensions:

- valence (how pleasant or unpleasant the picture is)
- arousal (how intensely emotional the image evokes)
- threat (how threatening you find the image)
- disgust (how disgusting you find the image)

where:

Valence:

1=disgust/negative

5=neutral

9=pleasant/positive

Arousal:

1=calm/peaceful

5=neutral

9=excited/excited

Threat:

1=unthreatening

9=threatening

Disgust

1 = not disgusting

9 = disgusting

## 122. Picture 41 \*

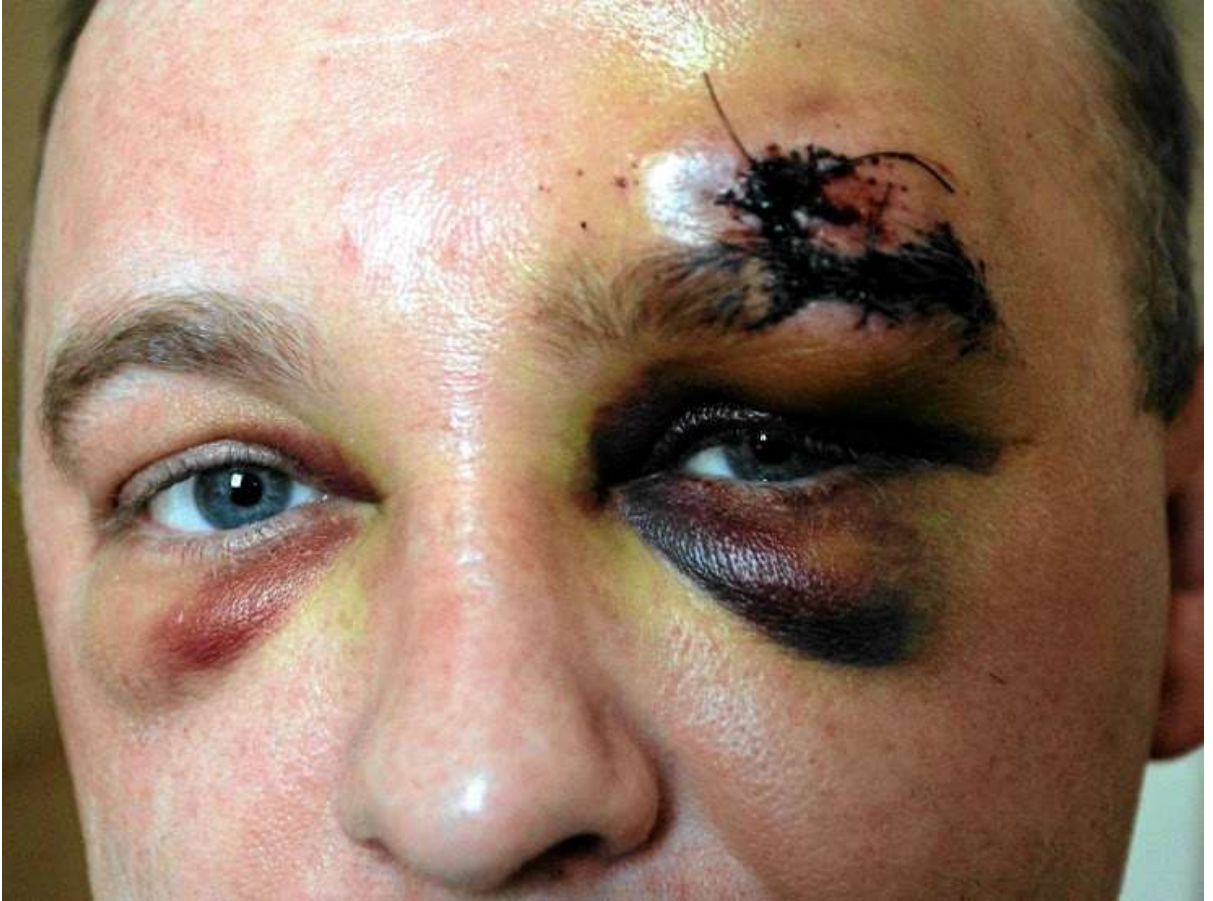

Soronként csak egy oválist jelöljön be.

|                                                          | 1                     | 2                     | 3                     | 4                     | 5                     | 6                     | 7                     | 8                     |
|----------------------------------------------------------|-----------------------|-----------------------|-----------------------|-----------------------|-----------------------|-----------------------|-----------------------|-----------------------|
| - valence<br>(how pleasant or unpleasant the picture is) | <input type="radio"/> |
| - arousal<br>(how intensely emotional the image evokes)  | <input type="radio"/> |
| - threat<br>(how threatening you find the image)         | <input type="radio"/> |
| - disgust<br>(how disgusting)                            | <input type="radio"/> |

**you find  
the image)**

**Rate the  
picture  
below!**

Please rate the images presented in the questionnaire on a nine-point scale along the following dimensions:

- valence (how pleasant or unpleasant the picture is)
- arousal (how intensely emotional the image evokes)
- threat (how threatening you find the image)
- disgust (how disgusting you find the image)

where:

Valence:

1=disgust/negative

5=neutral

9=pleasant/positive

Arousal:

1=calm/peaceful

5=neutral

9=excited/excited

Threat:

1=unthreatening

9=threatening

Disgust

1 = not disgusting

9 = disgusting

## 123. Picture 42 \*

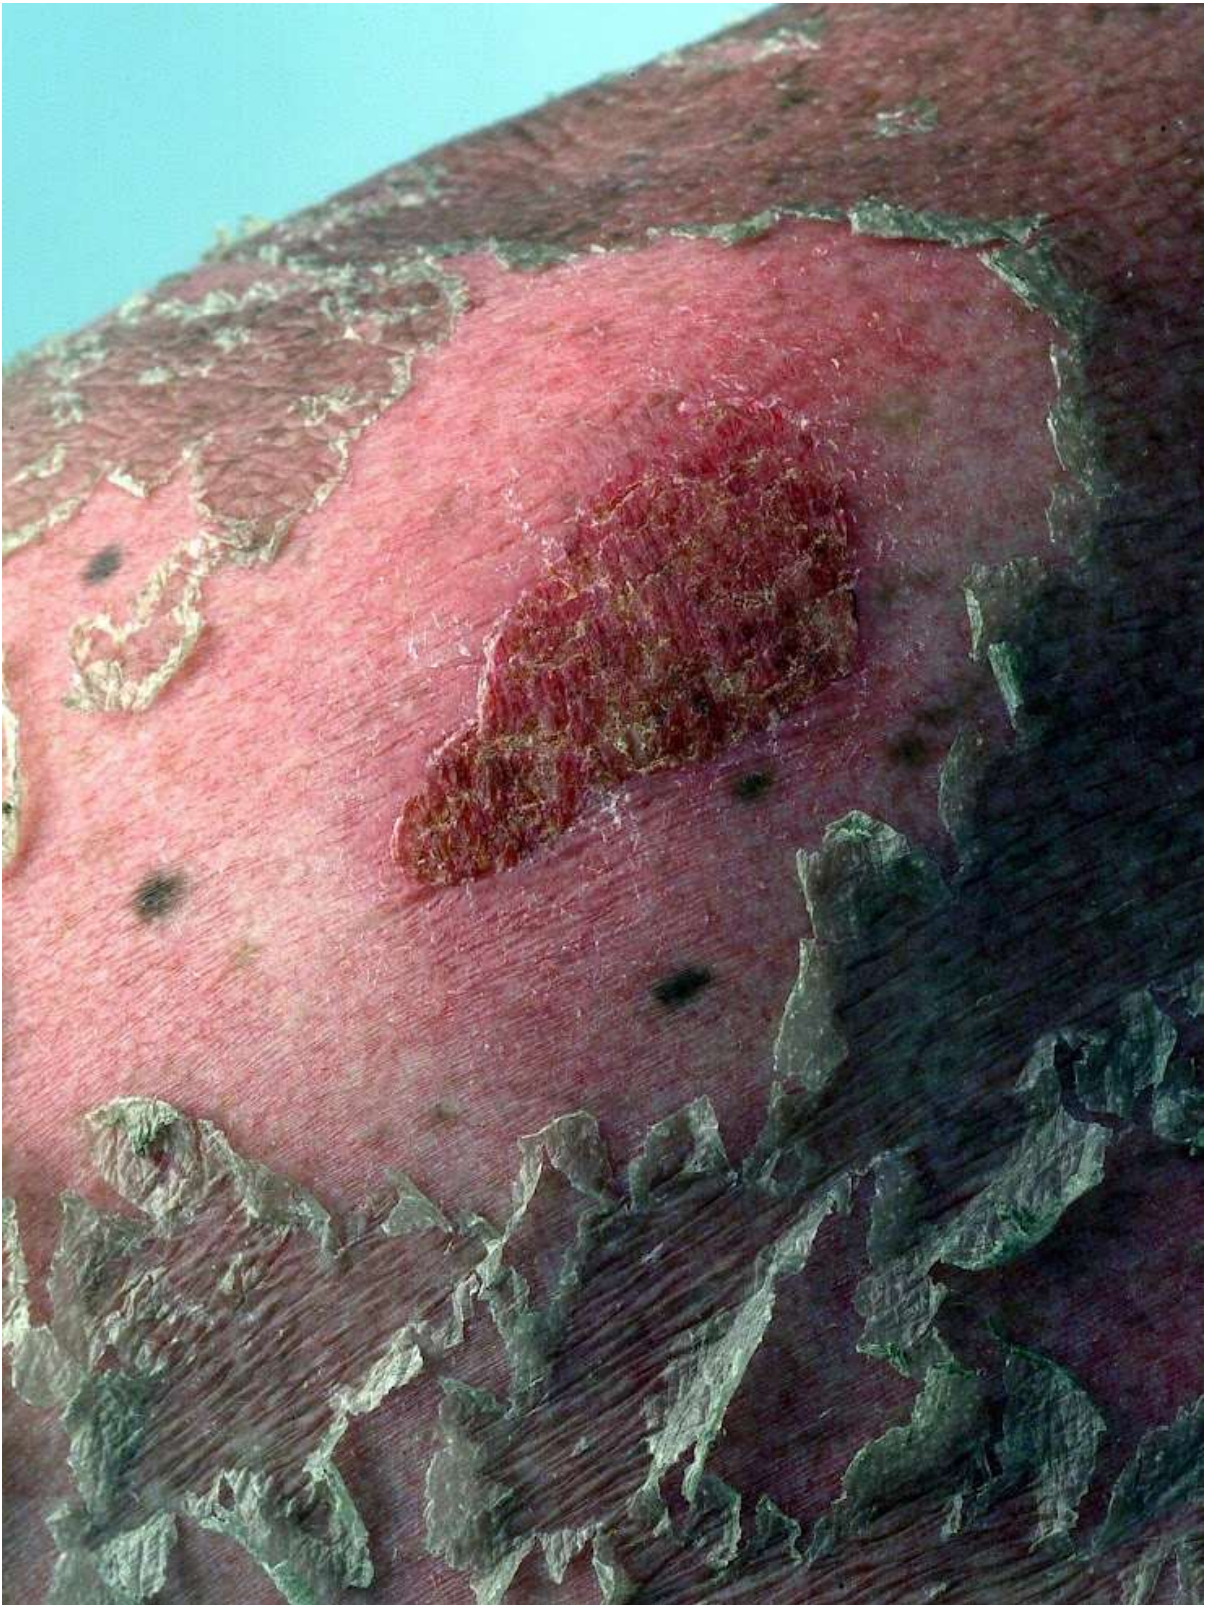

Soronként csak egy oválist jelöljön be.

1

2

3

4

5

6

7

8

- valence  
(how  
pleasant or  
unpleasant  
the picture  
is)



**- arousal  
(how  
intensely  
emotional  
the image  
evokes)**

       

**- threat  
(how  
threatening  
you find  
the image)**

       

**- disgust  
(how  
disgusting  
you find  
the image)**

       

Rate the  
picture  
below!

Please rate the images presented in the questionnaire on a nine-point scale along the following dimensions:

- valence (how pleasant or unpleasant the picture is)
  - arousal (how intensely emotional the image evokes)
  - threat (how threatening you find the image)
  - disgust (how disgusting you find the image)
- where:

Valence:

- 1=disgust/negative
- 5=neutral
- 9=pleasant/positive

Arousal:

- 1=calm/peaceful
- 5=neutral
- 9=excited/excited

Threat:

- 1=unthreatening
- 9=threatening

Disgust

- 1 = not disgusting
- 9 = disgusting

## 124. Picture 43 \*

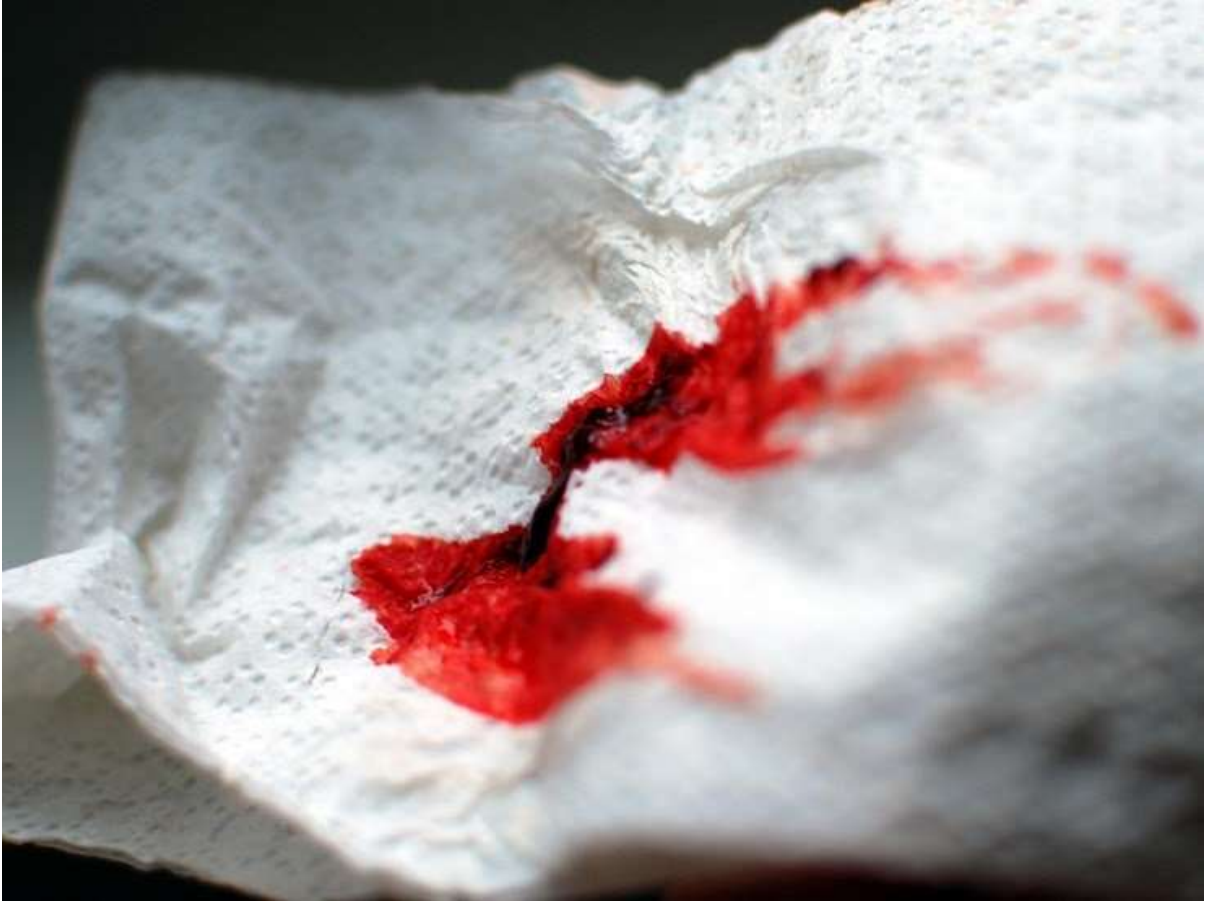

Soronként csak egy oválist jelöljön be.

|                                                          | 1                     | 2                     | 3                     | 4                     | 5                     | 6                     | 7                     | 8                     |
|----------------------------------------------------------|-----------------------|-----------------------|-----------------------|-----------------------|-----------------------|-----------------------|-----------------------|-----------------------|
| - valence<br>(how pleasant or unpleasant the picture is) | <input type="radio"/> |
| - arousal<br>(how intensely emotional the image evokes)  | <input type="radio"/> |
| - threat<br>(how threatening you find the image)         | <input type="radio"/> |
| - disgust<br>(how disgusting)                            | <input type="radio"/> |

**you find  
the image)**

**Rate the  
picture  
below!**

Please rate the images presented in the questionnaire on a nine-point scale along the following dimensions:

- valence (how pleasant or unpleasant the picture is)
- arousal (how intensely emotional the image evokes)
- threat (how threatening you find the image)
- disgust (how disgusting you find the image)

where:

Valence:

1=disgust/negative

5=neutral

9=pleasant/positive

Arousal:

1=calm/peaceful

5=neutral

9=excited/excited

Threat:

1=unthreatening

9=threatening

Disgust

1 = not disgusting

9 = disgusting

## 125. Picture 44 \*

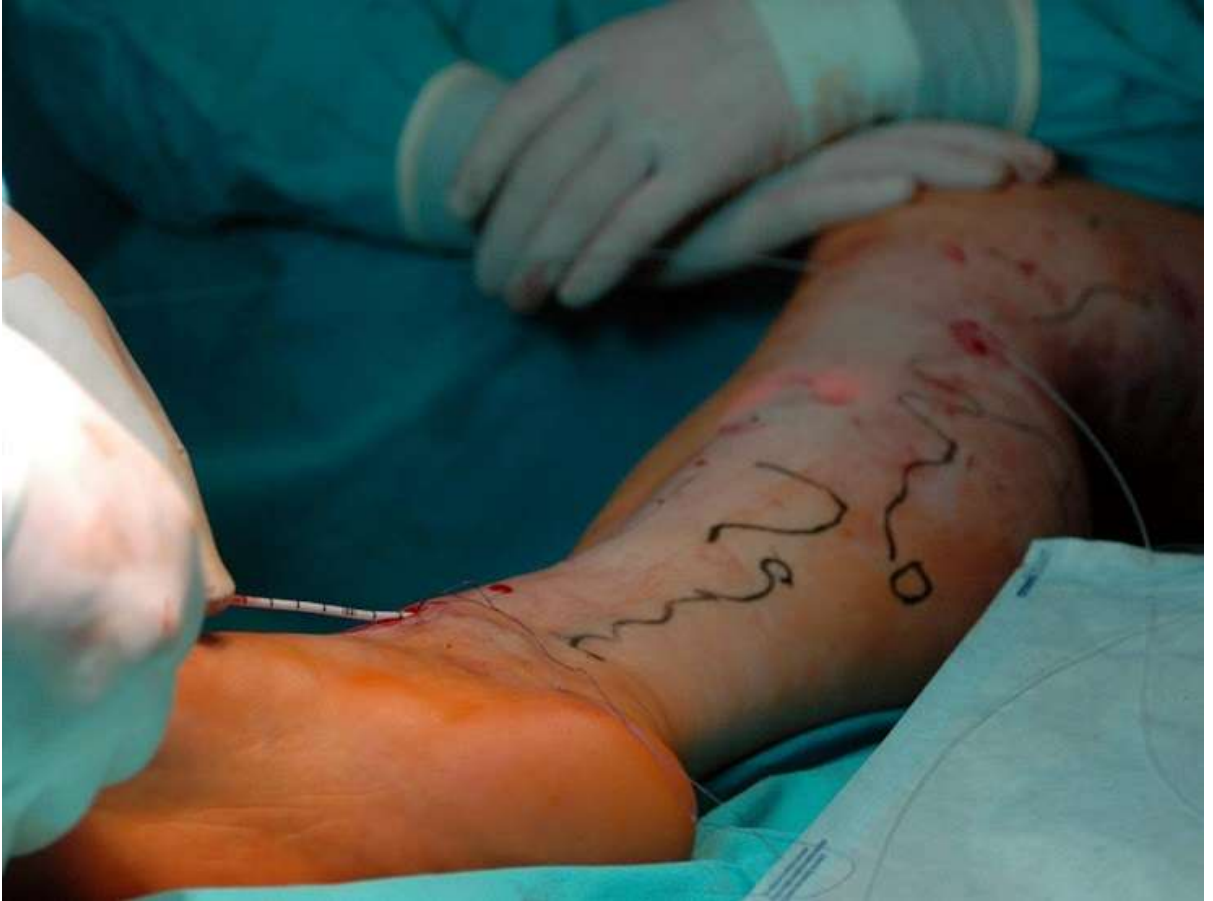

Soronként csak egy oválist jelöljön be.

|                                                          | 1                     | 2                     | 3                     | 4                     | 5                     | 6                     | 7                     | 8                     |
|----------------------------------------------------------|-----------------------|-----------------------|-----------------------|-----------------------|-----------------------|-----------------------|-----------------------|-----------------------|
| - valence<br>(how pleasant or unpleasant the picture is) | <input type="radio"/> |
| - arousal<br>(how intensely emotional the image evokes)  | <input type="radio"/> |
| - threat<br>(how threatening you find the image)         | <input type="radio"/> |
| - disgust<br>(how disgusting)                            | <input type="radio"/> |

**you find  
the image)**

**Rate the  
picture  
below!**

Please rate the images presented in the questionnaire on a nine-point scale along the following dimensions:

- valence (how pleasant or unpleasant the picture is)
- arousal (how intensely emotional the image evokes)
- threat (how threatening you find the image)
- disgust (how disgusting you find the image)

where:

Valence:

1=disgust/negative

5=neutral

9=pleasant/positive

Arousal:

1=calm/peaceful

5=neutral

9=excited/excited

Threat:

1=unthreatening

9=threatening

Disgust

1 = not disgusting

9 = disgusting

126. Picture 45 \*

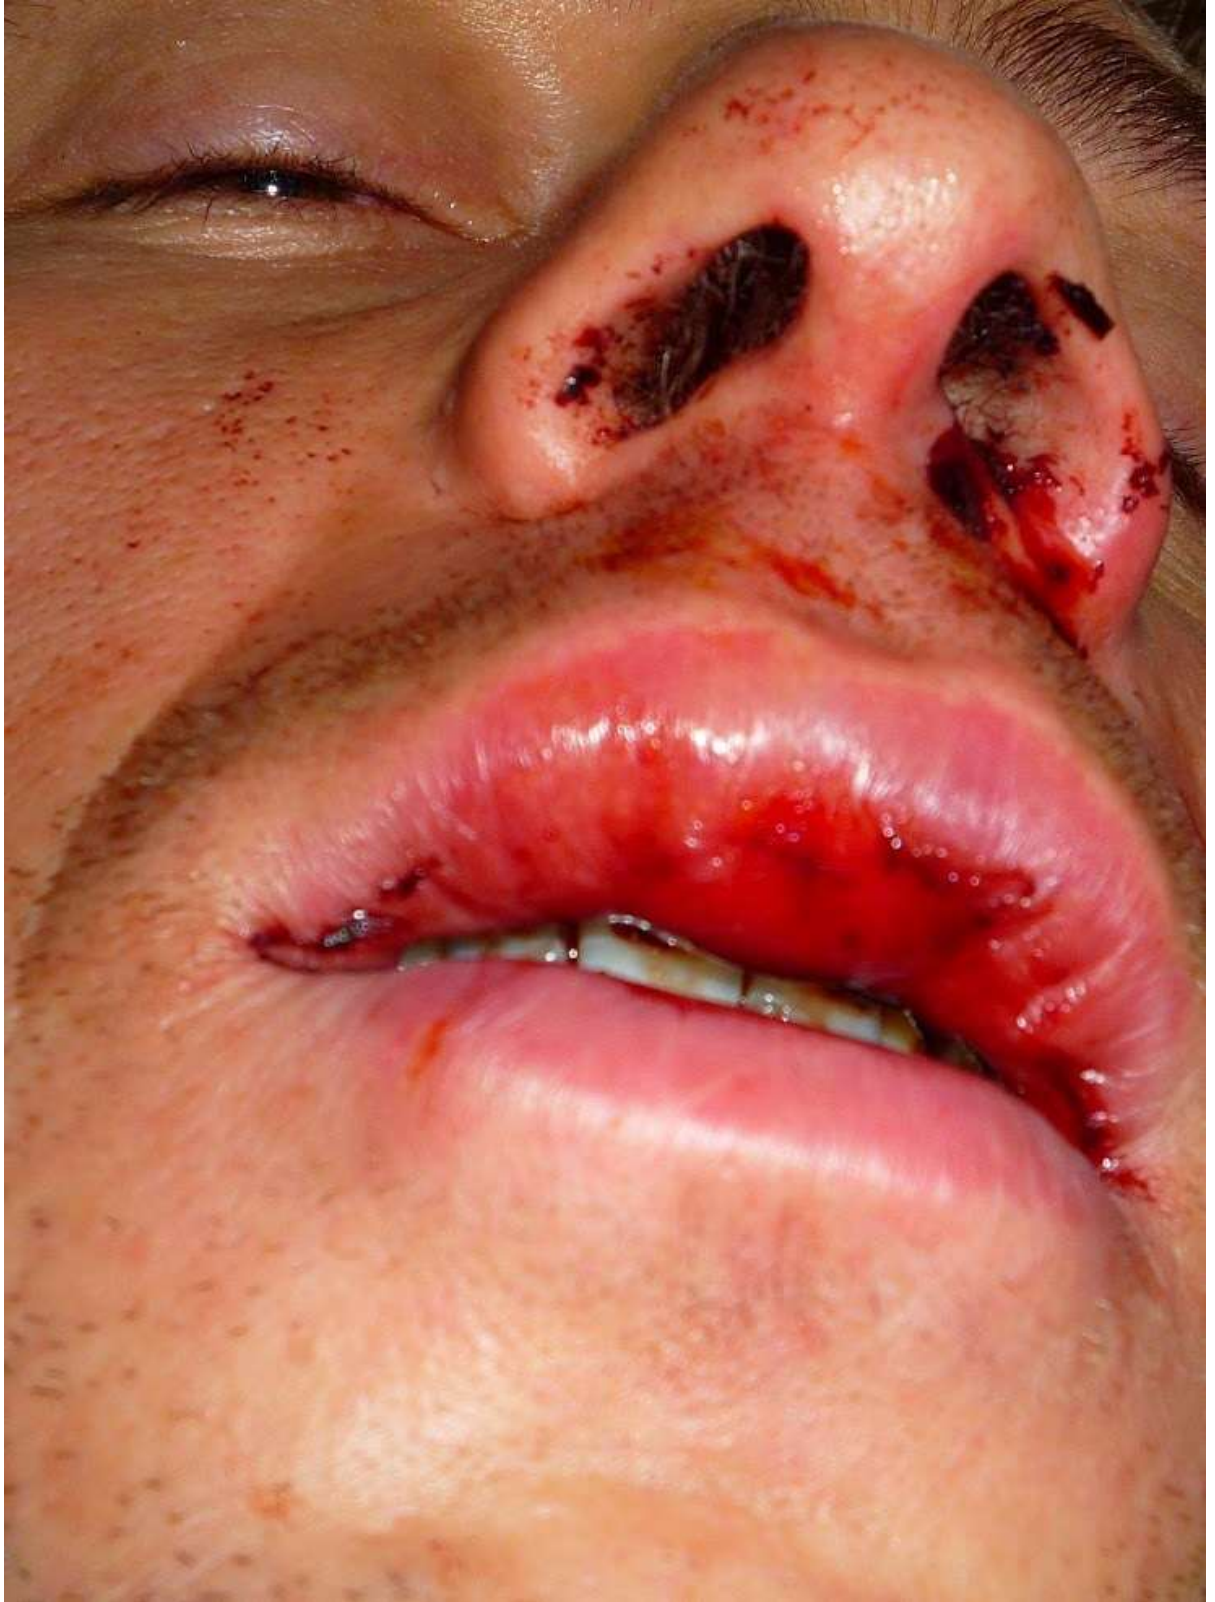

Soronként csak egy oválist jelöljön be.

1 2 3 4 5 6 7 8

- valence  
(how  
pleasant or  
unpleasant  
the picture  
is)

**- arousal  
(how  
intensely  
emotional  
the image  
evokes)**

**- threat  
(how  
threatening  
you find  
the image)**

**- disgust  
(how  
disgusting  
you find  
the image)**

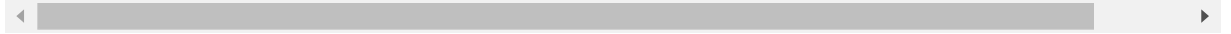

End of the questionnaire

Thank you for helping us by filling in the form!

Ezt a tartalmat nem a Google hozta létre, és nem is hagyta azt jóvá.

Google Űrlapok
